# Supplementary material for: Combined C–H functionalization/O–H insertion reaction to form tertiary β-alkoxy substituted β-aminophosphonates catalyzed by [Cu(MeCN)4]PF6
Source: Royal Society of Chemistry journal article supplement (doi:10.1039/c3ob40941d), 2013-01-01
Supplement: c3ob40941d.pdf [file c3ob40941d.pdf]

# **Combined C-H Functionalization/O-H Insertion Reaction to Form Tertiary $\beta$ -Alkoxy Substituted $\beta$ -Aminophosphonates Catalyzed by $[\text{Cu}(\text{MeCN})_4]\text{PF}_6$**

Yan Cai,<sup>a</sup> Yuchen Lu,<sup>a</sup> Chengbin Yu,<sup>a</sup> Hairong Lv,<sup>a</sup> and Zhiwei Miao<sup>a,b\*</sup>

<sup>a</sup> *State Key Laboratory and Institute of Elemento-Organic Chemistry, Nankai University, Tianjin 300071, China Fax:*

*(+86)-22-2350-2351; e-mail: miaozhiwei@nankai.edu.cn*

<sup>b</sup> *Key Laboratory of Bioorganic Phosphorus Chemistry & Chemical Biology (Ministry of Education), Tsinghua University,*

*Beijing 100084, China*

## Supporting Information

### List of contents (pages)

|                                                                                     |     |
|-------------------------------------------------------------------------------------|-----|
| 1. General comments.....                                                            | S1  |
| 2. General procedure for the synthesis of $\alpha$ -diazophosphonate <b>6</b> ..... | S1  |
| 3. General procedure for the preparation of <b>8</b> .....                          | S12 |
| 4. The $^1\text{H}$ and $^{13}\text{C}$ NMR of <b>9a</b> .....                      | S48 |
| 5. X-ray crystal structure of <b>9a</b> .....                                       | S51 |

#### General Comments.

All reactions and manipulations were performed using standard Schlenk techniques. All solvents were purified and dried according to standard procedures before use. Unless otherwise indicated, all materials were obtained from commercial sources, and used as purchased without dehydration. Flash column chromatography was performed on silica gel (particle size 10-40  $\mu\text{m}$ , Ocean Chemical Factory of Qingdao, China). Nitrogen gas (99.999%) was purchased from Boc Gas Inc. Preparative high performance liquid chromatography (HPLC) for separations were performed using Agilent 1260 Infinity machines.  $^1\text{H}$  NMR,  $^{13}\text{C}$  NMR and  $^{31}\text{P}$  NMR spectra were recorded on Bruker-400 (400 MHz for  $^1\text{H}$ , 101MHz for  $^{13}\text{C}$ ) spectrometers. Chemical shifts were reported in ppm downfield from internal  $\text{Si}(\text{CH}_3)_4$ .  $\text{H}_3\text{PO}_4$  served as internal standard ( $\delta = 0$  ppm) for  $^{31}\text{P}$  NMR. The crystal structure was determined on a Bruker SMART 1000 CCD diffractometer. Mass spectra were recorded on a LCQ advantage spectrometer with ESI resource. HR-MS were recorded on APEXII and ZAB-HS spectrometer. Melting points were determined on a T-4 melting point apparatus (uncorrected). Optical rotations were recorded on a Perkin Elemer 241 Polarimeter.

## General procedure for the synthesis of $\alpha$ -diazophosphonate **6a**

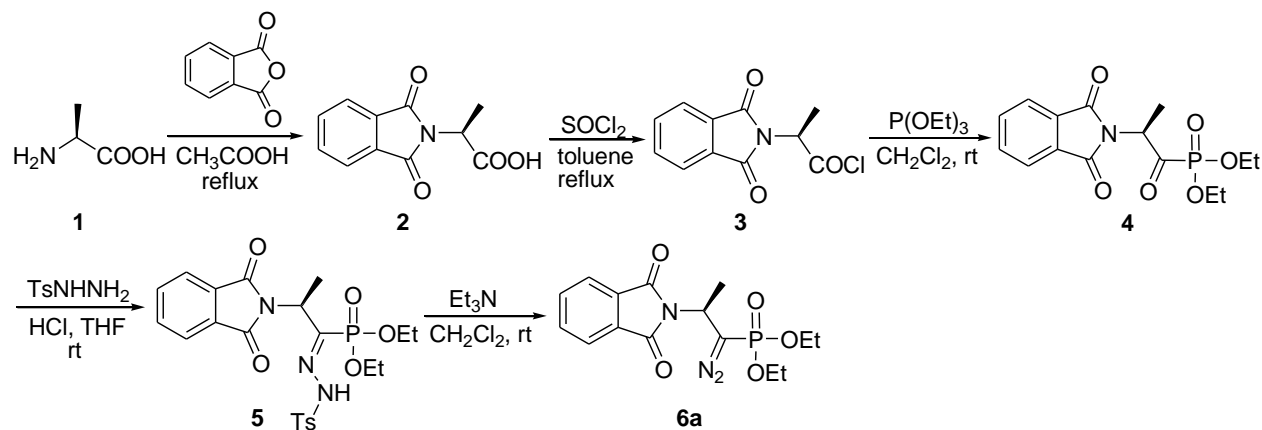

A solution of L- $\alpha$ -alanine **1** (5 g, 0.056 mol) and phthalic acid anhydride (7.4 g, 0.05 mol) in 10 mL acetic acid was stirred at room temperature for several minutes, then the solution was heated to reflux for 2h. The mixture was cooled to room temperature, after evaporation acetic acid with rotate evaporator, (*S*)-2-(1,3-dioxoisindolin-2-yl)propanoic acid **2** was obtained as a white solid. The product **2** was directly used for next reactions without further purification.

A solution of **2** (8.4 g, 0.038 mol) in 50 mL toluene was stirred at room temperature for several minutes, then thionyl chloride (4.2 mL, 0.057 mol) was added dropwise. The solution was heated to reflux for 2h and then the mixture was cooled to room temperature. The solvent and excess thionyl chloride were removed with rotate evaporator, a brownish yellow oil which contained (*S*)-2-(1,3-dioxoisindolin-2-yl)propanoyl chloride **3** was obtained.

After dissolved the brownish oil in 10 mL of  $\text{CH}_2\text{Cl}_2$ , triethyl phosphate (6.6 mL, 0.038 mol) was introduced, and the mixture was stirred at room temperature for 4h. After evaporated the solvent under reduced pressure, a light brownish yellow oil which contained (*S*)-diethyl (2-(1,3-dioxoisindolin-2-yl)propanoyl)phosphonate **4** was obtained.

The light brownish yellow oil was dissolved in 50 mL of THF, followed by addition of 4-methylbenzenesulfonylhydrazide (7 g, 0.038 mol) and 50  $\mu\text{L}$  concentrated HCl aq. The mixture was stirred at room temperature for 10h. After remove the solvent under reduced pressure, a light yellow oil which contained (*S*)-diethyl (2-(1,3-dioxoisindolin-2-yl)-1-(2-tosylhydrazono)propyl)phosphonate **5** was obtained. Then added 20 mL  $\text{CH}_2\text{Cl}_2$  to dissolve the light yellow oil, triethylamine (12 mL, 0.086

mol) was added to the solution. The mixture was stirred at room temperature for 16h. After the solvent and excess triethylamine were removed under reduced pressure, the residue was purified by column chromatograph on silica gel with the eluent (CH<sub>2</sub>Cl<sub>2</sub>/AcOEt: 10/1) to give the yellow solid (S)-diethyl(1-diazo-2-(1,3-dioxoisindolin-2-yl)prop-yl)phosphonate **6a**. The overall yield upon to 42% for this five-step sequence reaction.

**(S)-Diethyl (1-diazo-2-(1,3-dioxoisindolin-2-yl)propyl)phosphonate (6a):**

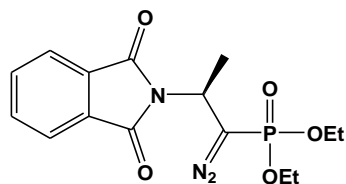

Yellow solid; 42% overall yield; mp 59-61°C; [ $\alpha$ ]<sub>D</sub><sup>25</sup> -204 (c 0.02, CH<sub>2</sub>Cl<sub>2</sub>);

<sup>1</sup>H NMR (400 MHz, CDCl<sub>3</sub>):  $\delta$  7.85-7.88 (m, 2H, Ph), 7.74-7.76 (m, 2H, Ph), 5.03-5.10 (m, 1H, CH), 3.87-4.15 (m, 4H, 2OCH<sub>2</sub>), 1.69 (d,  $J$  = 7.2

Hz, 3H, CH<sub>3</sub>), 1.33 (t,  $J$  = 7.1 Hz, 3H, CH<sub>3</sub>), 1.04 (t,  $J$  = 7.1 Hz, 3H, CH<sub>3</sub>); <sup>13</sup>C NMR (101 MHz, CDCl<sub>3</sub>):  $\delta$  167.63 (C=O), 134.16, 131.98, 123.34 (Ph), 62.76 (d,  $J$  = 5.6 Hz, OCH<sub>2</sub>), 62.55 (d,  $J$  = 5.6 Hz, OCH<sub>2</sub>), 45.83 (d,  $J$  = 235.3 Hz, C-P), 42.35 (CH), 17.15 (CH<sub>3</sub>), 16.16 (d,  $J$  = 6.9 Hz, CH<sub>3</sub>), 15.85 (d,  $J$  = 6.9 Hz, CH<sub>3</sub>); <sup>31</sup>P NMR (162 MHz, CDCl<sub>3</sub>):  $\delta$  18.53 (s). ESI-HRMS calcd for C<sub>15</sub>H<sub>18</sub>N<sub>3</sub>O<sub>5</sub>P: 352.1057 (M+1)<sup>+</sup>; Found: 352.1055.

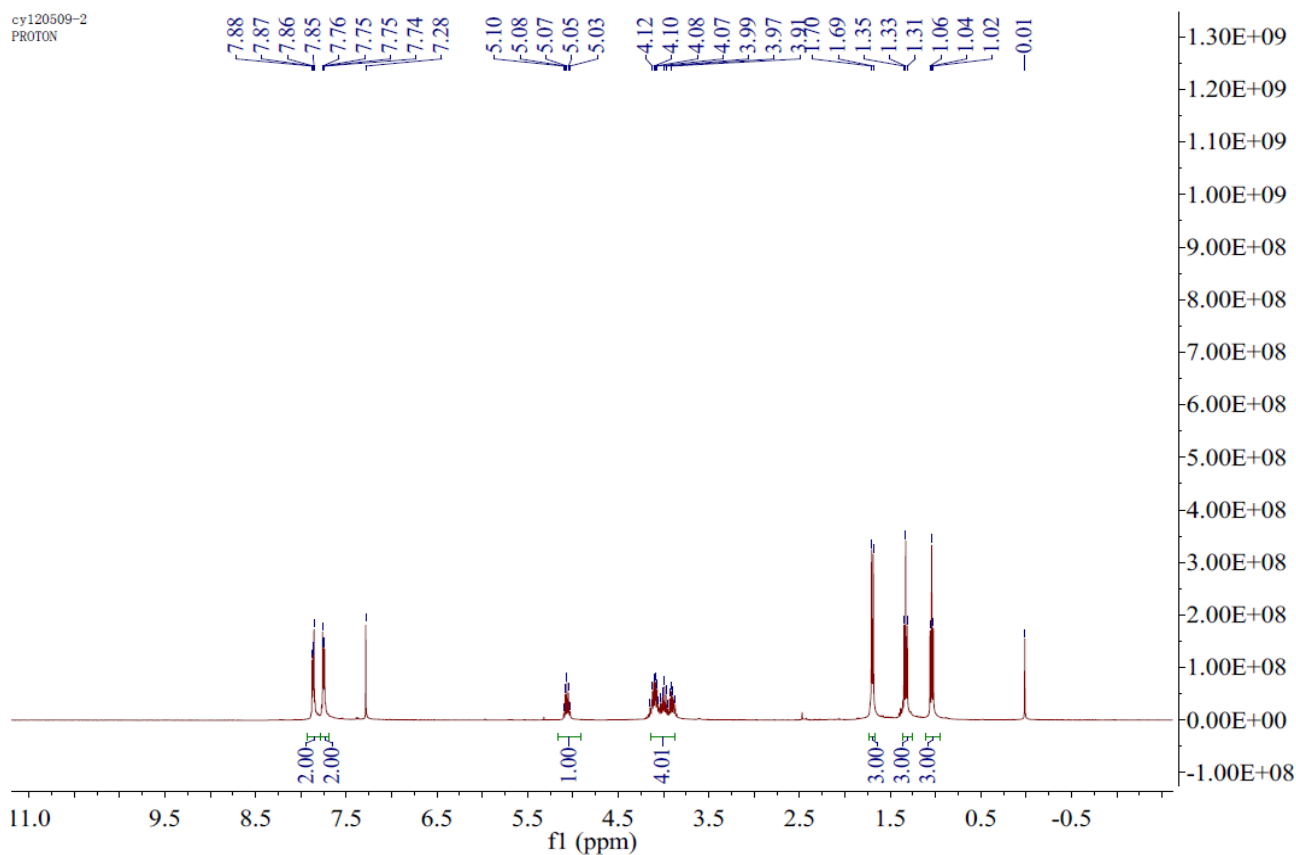

cy-2012-06-23-2  
C13CPD

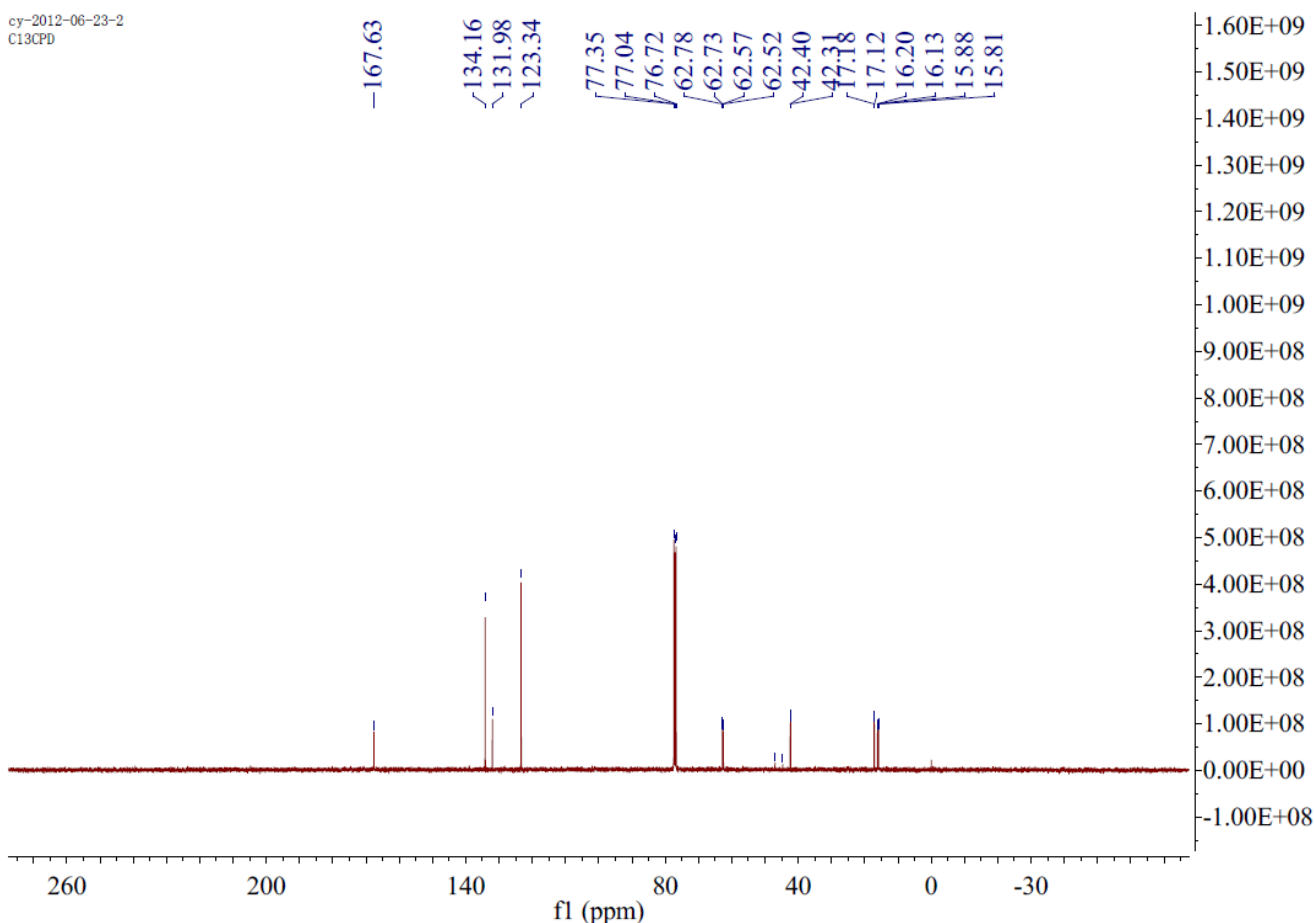

**(S)-Dimethyl (1-diazo-2-(1,3-dioxoisindolin-2-yl)propyl)phosphonate (6b):**

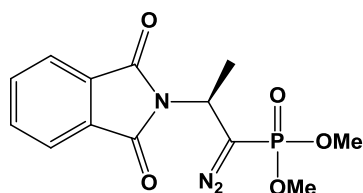

Yellow solid; 15% overall yield; mp 98-101°C;  $[\alpha]_D^{25}$  -213.3 (c 0.02, CH<sub>2</sub>Cl<sub>2</sub>); <sup>1</sup>H NMR (400 MHz, CDCl<sub>3</sub>): δ 7.83-7.88 (m, 2H, Ph), 7.71-7.78 (m, 2H, Ph), 5.00-5.07 (m, 1H, CH), 3.74 (d, *J* = 11.6 Hz, 3H, OCH<sub>3</sub>), 3.56 (d, *J* = 11.6 Hz, 3H, OCH<sub>3</sub>), 1.69 (d, *J* = 7.1 Hz, 3H, CH<sub>3</sub>); <sup>13</sup>C NMR (101 MHz, CDCl<sub>3</sub>): δ 167.58 (C=O), 134.22, 131.83, 123.39 (Ph), 53.13 (d, *J* = 5.6 Hz, OCH<sub>3</sub>), 52.95 (d, *J* = 5.6 Hz, OCH<sub>3</sub>), 45.07 (d, *J* = 236.5 Hz, C-P), 42.30 (d, *J* = 9.1 Hz, CH), 17.15 (d, *J* = 6.2 Hz, CH<sub>3</sub>); <sup>31</sup>P NMR (162 MHz, CDCl<sub>3</sub>): δ 21.64 (s). ESI-HRMS calcd for C<sub>13</sub>H<sub>14</sub>N<sub>3</sub>O<sub>5</sub>P: 341.1009 (M+NH<sub>4</sub>)<sup>+</sup>; Found: 341.1004.

cy-2012-04-27-3  
PROTON

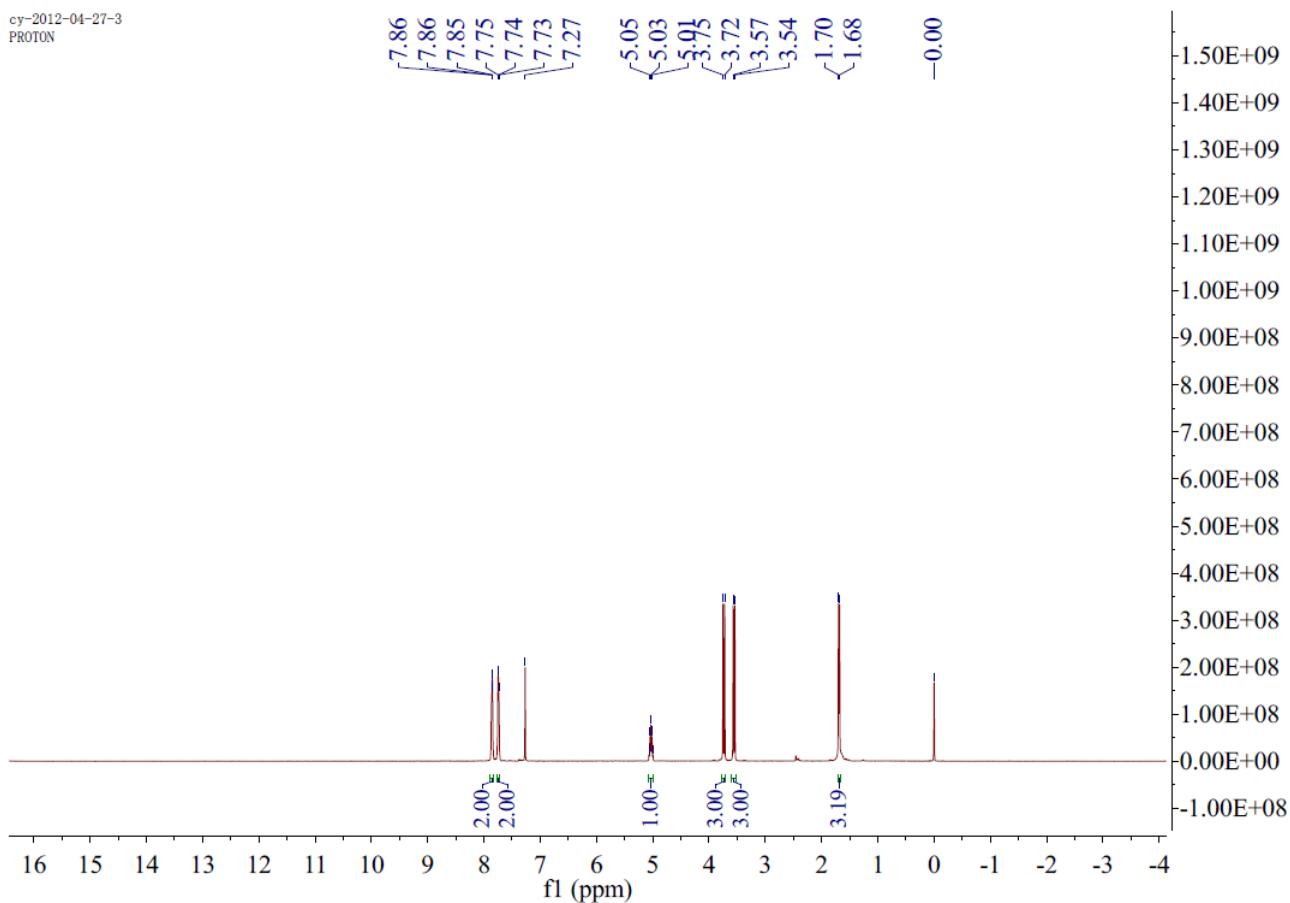

cy-2012-06-24-5-3  
C13CPD

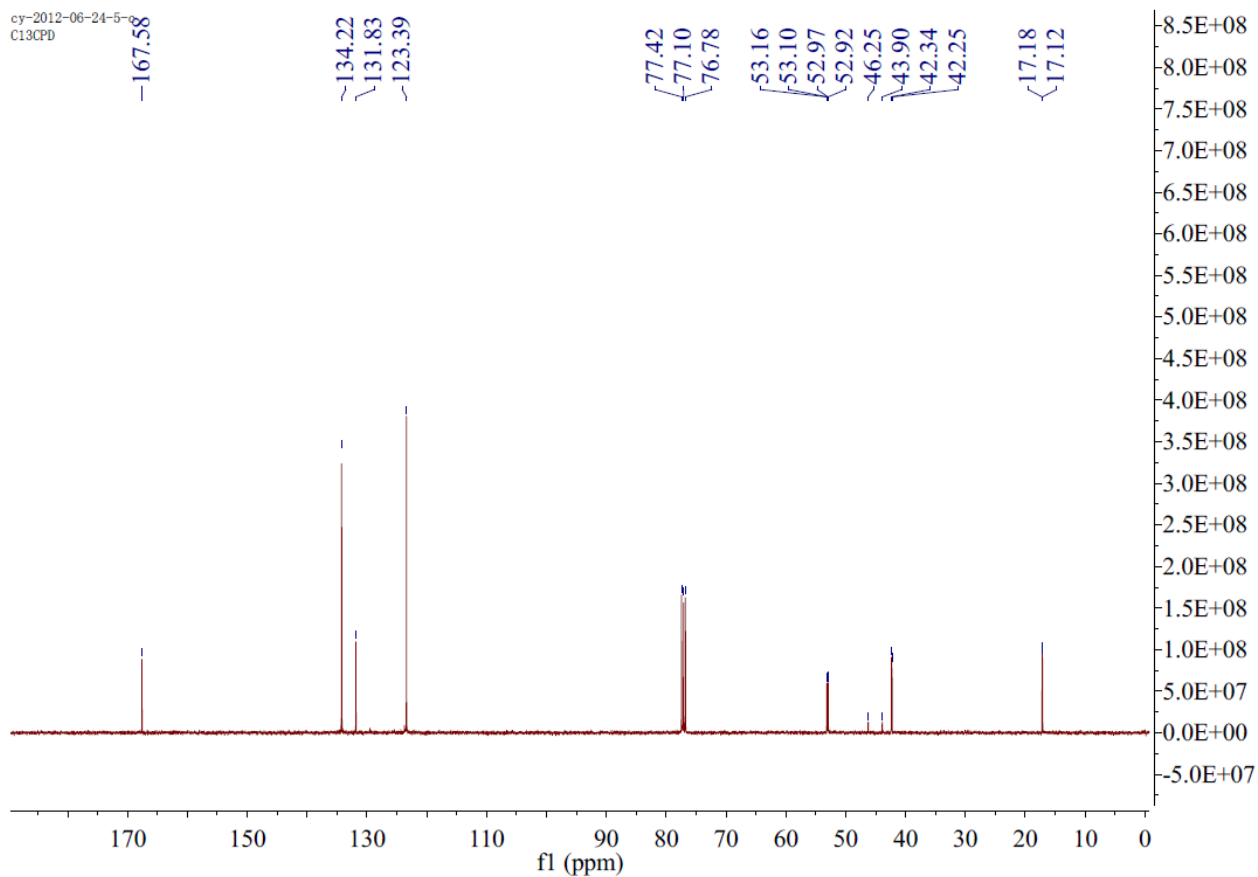

**(S)-Diethyl (1-diazo-2-(1,3-dioxoisindolin-2-yl)-3-phenylpropyl)phosphonate (6c):**

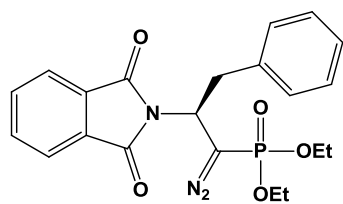

Yellow oil; 47% overall yield;  $[\alpha]_D^{25}$  -182.5 (c 0.22,  $\text{CH}_2\text{Cl}_2$ );  $^1\text{H}$  NMR (400 MHz,  $\text{CDCl}_3$ ):  $\delta$  7.81-7.84 (m, 2H, Ph), 7.70-7.74 (m, 2H, Ph), 7.22-7.30 (m, 5H, Ph), 5.04 (dd,  $J = 16.2, 7.8$  Hz, 1H, CH), 3.84-3.96 (m, 2H,  $\text{OCH}_2$ ), 3.64-3.81 (m, 2H,  $\text{OCH}_2$ ), 3.38 (dd,  $J = 13.7, 8.4$  Hz, 1H,  $\text{CH}_2$ ), 3.28 (dd,  $J = 13.7, 8.4$  Hz, 1H,  $\text{CH}_2$ ), 1.18 (t,  $J = 7.1$  Hz, 3H,  $\text{CH}_3$ ), 1.00 (t,  $J = 7.1$  Hz, 3H,  $\text{CH}_3$ );  $^{13}\text{C}$  NMR (101 MHz,  $\text{CDCl}_3$ ):  $\delta$  167.64 (C=O), 136.09, 134.20, 131.75, 128.86, 128.79, 127.29, 123.39 (Ph), 62.48 (d,  $J = 5.4$  Hz,  $\text{OCH}_2$ ), 48.29 (d,  $J = 8.9$  Hz, CH), 44.81 (d,  $J = 234.5$  Hz, C-P), 37.03 (d,  $J = 5.9$  Hz,  $\text{CH}_2$ ), 16.06 (d,  $J = 7.1$  Hz,  $\text{CH}_3$ ), 15.83 (d,  $J = 7.1$  Hz,  $\text{CH}_3$ );  $^{31}\text{P}$  NMR (162 MHz,  $\text{CDCl}_3$ ):  $\delta$  18.36 (s). ESI-HRMS calcd for  $\text{C}_{21}\text{H}_{22}\text{N}_3\text{O}_5\text{P}$ : 450.1189 ( $\text{M}+\text{Na}$ ) $^+$ ; Found: 450.1182.

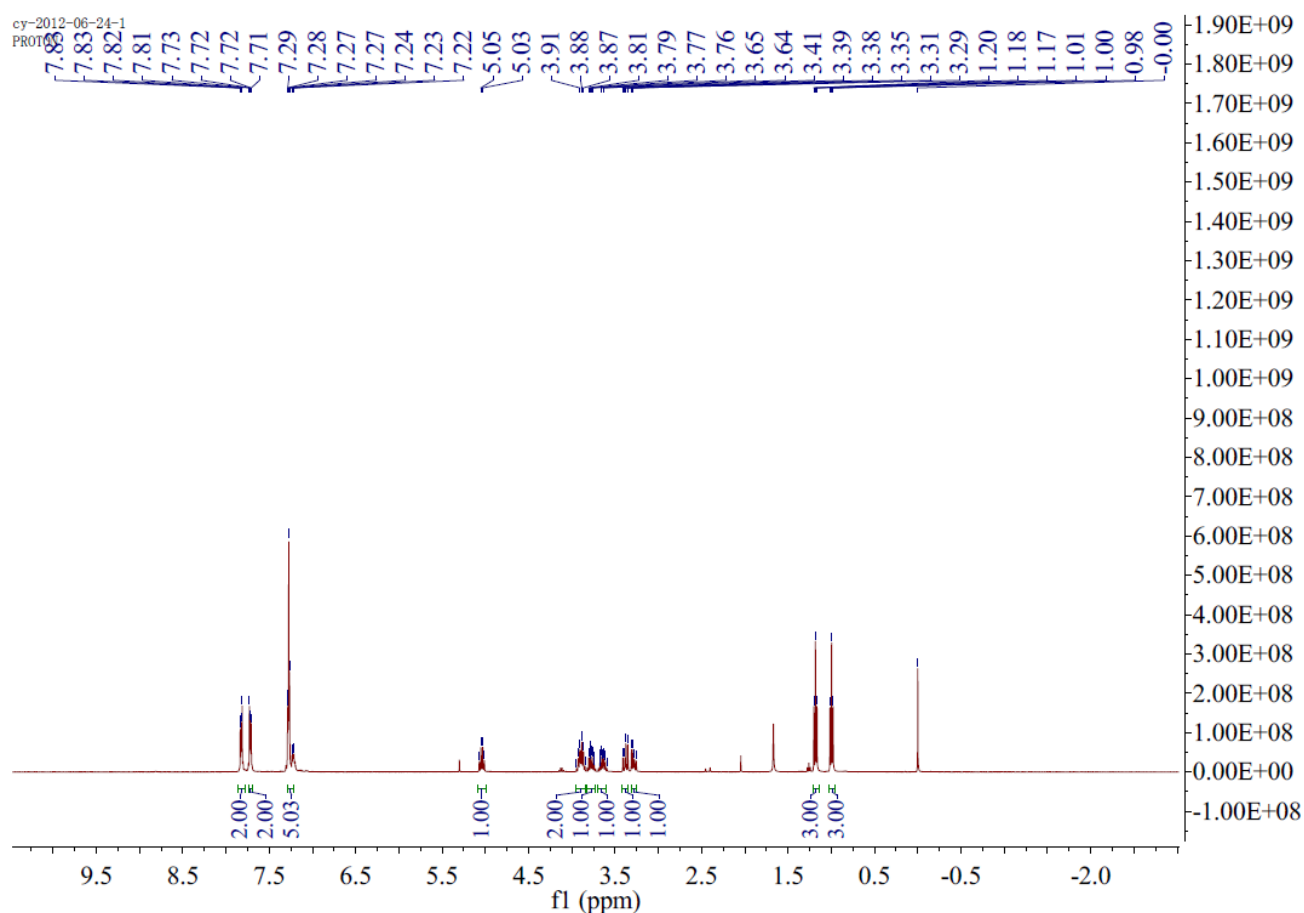

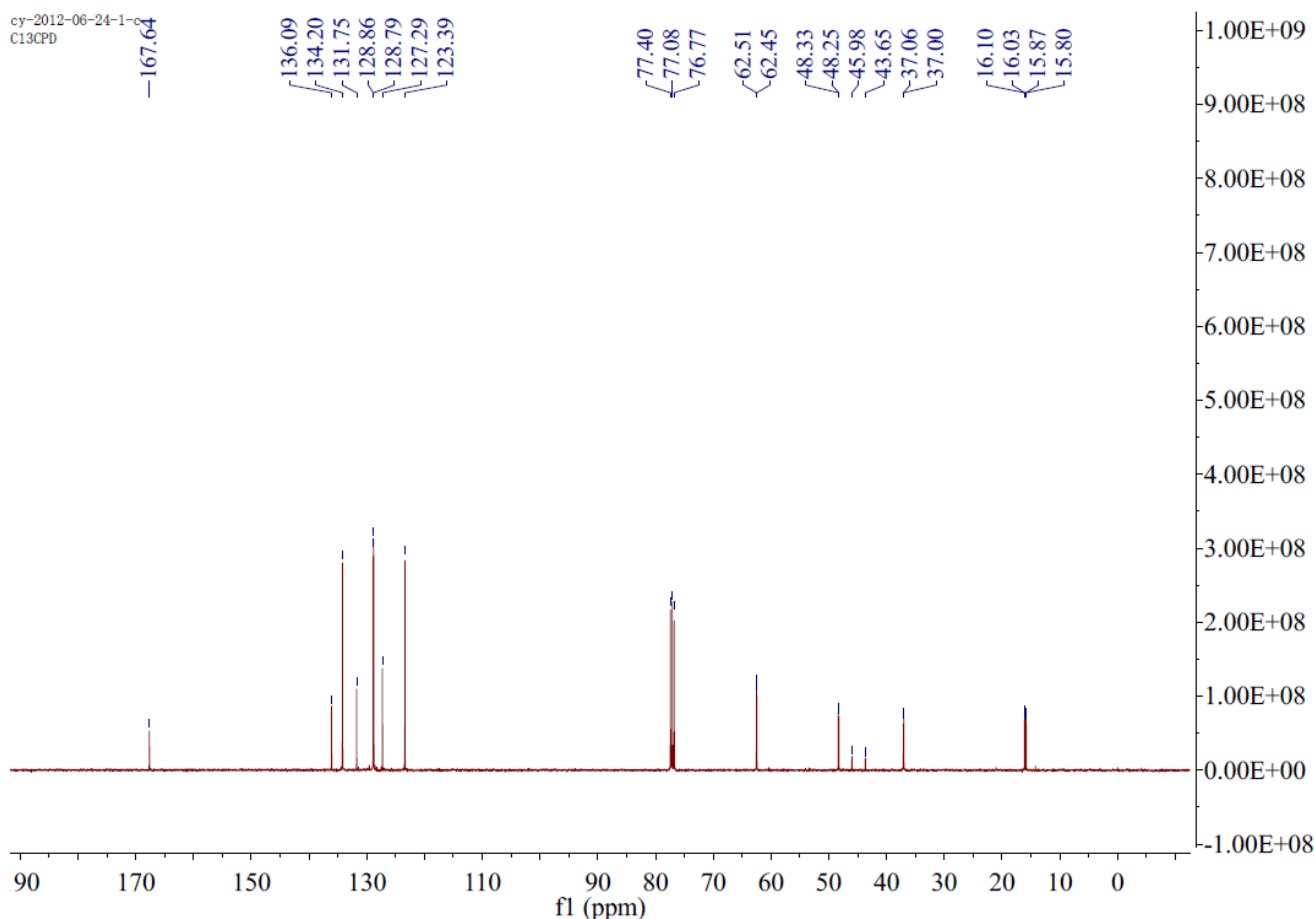

**(S)-Diethyl (1-diazo-2-(1,3-dioxoisindolin-2-yl)-3-methylbutyl)phosphonate (6d):**

Yellow solid; 52% overall yield; mp 67-69 °C;  $[\alpha]_D^{25}$  -142 (c 0.22, CH<sub>2</sub>Cl<sub>2</sub>); <sup>1</sup>H NMR (400 MHz, CDCl<sub>3</sub>): δ 7.84-7.87 (m, 2H, Ph), 7.72-7.76 (m, 2H, Ph), 4.35 (dd, *J* = 11.4, 7.4 Hz, 1H, CH), 4.03-4.16 (m, 2H, OCH<sub>2</sub>), 3.82-4.01 (m, 2H, OCH<sub>2</sub>), 2.46-2.56 (m, 1H, CH), 1.33 (t, *J* = 7.1 Hz, 3H, CH<sub>3</sub>), 1.16 (d, *J* = 6.6 Hz, 3H, CH<sub>3</sub>), 1.01 (t, *J* = 7.1 Hz, 3H, CH<sub>3</sub>), 0.92 (d, *J* = 6.6 Hz, 3H, CH<sub>3</sub>); <sup>13</sup>C NMR (101 MHz, CDCl<sub>3</sub>): δ 167.95 (C=O), 134.19, 131.81, 123.41 (Ph), 62.70 (d, *J* = 5.8 Hz, OCH<sub>2</sub>), 62.48 (d, *J* = 5.8 Hz, OCH<sub>2</sub>), 53.55 (d, *J* = 8.0 Hz, CH), 44.59 (d, *J* = 235.9 Hz, C-P), 28.49 (d, *J* = 5.8 Hz, CH), 20.03 (CH<sub>3</sub>), 19.50 (CH<sub>3</sub>), 16.22 (d, *J* = 7.0 Hz, CH<sub>3</sub>), 15.85 (d, *J* = 7.0 Hz, CH<sub>3</sub>); <sup>31</sup>P NMR (162 MHz, CDCl<sub>3</sub>): δ 19.4 (s). ESI-HRMS calcd for C<sub>17</sub>H<sub>22</sub>N<sub>3</sub>O<sub>5</sub>P: 402.1189 (M+Na)<sup>+</sup>; Found: 402.1182.



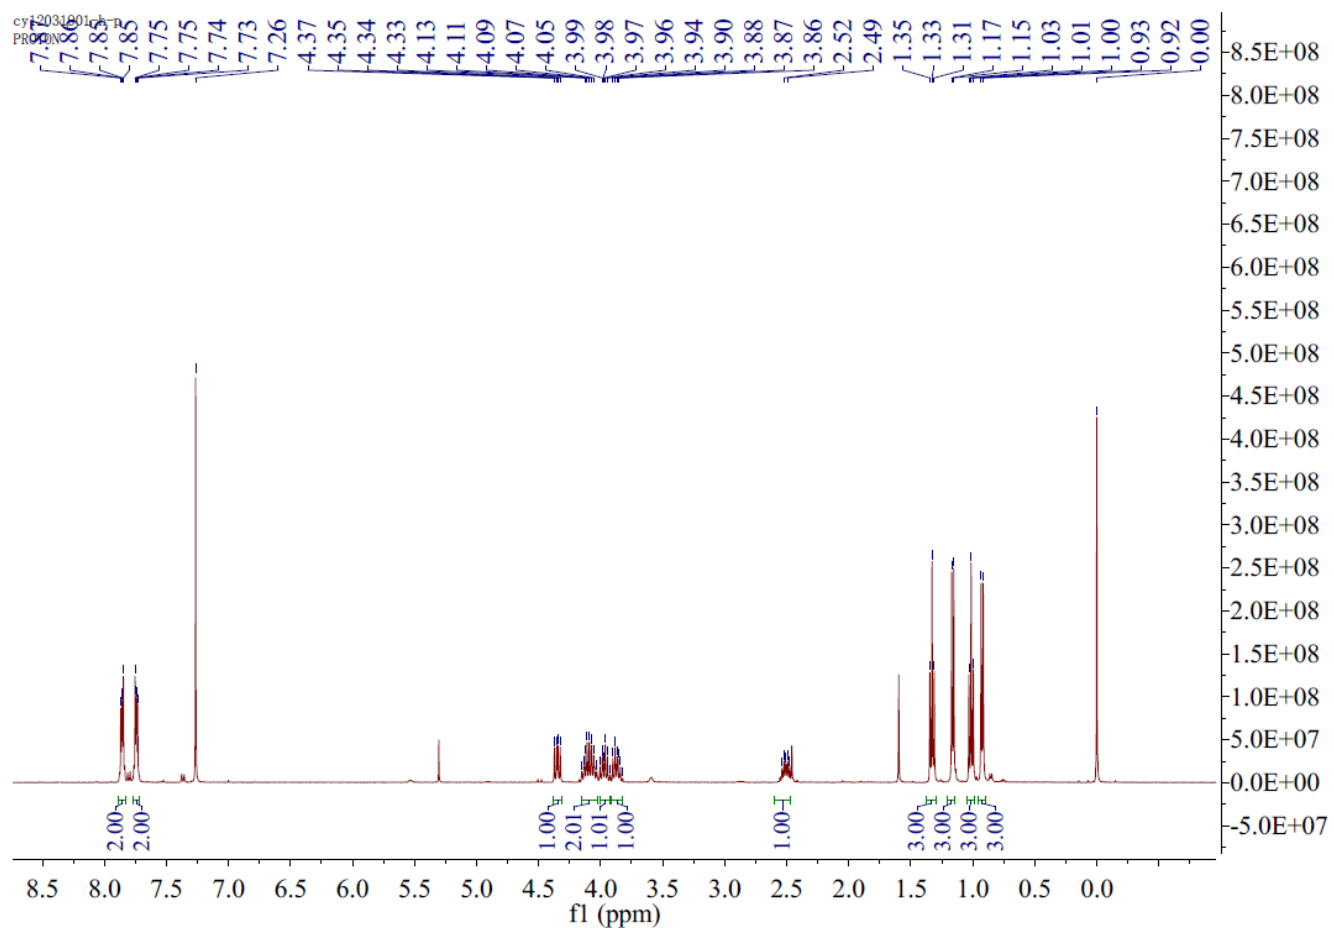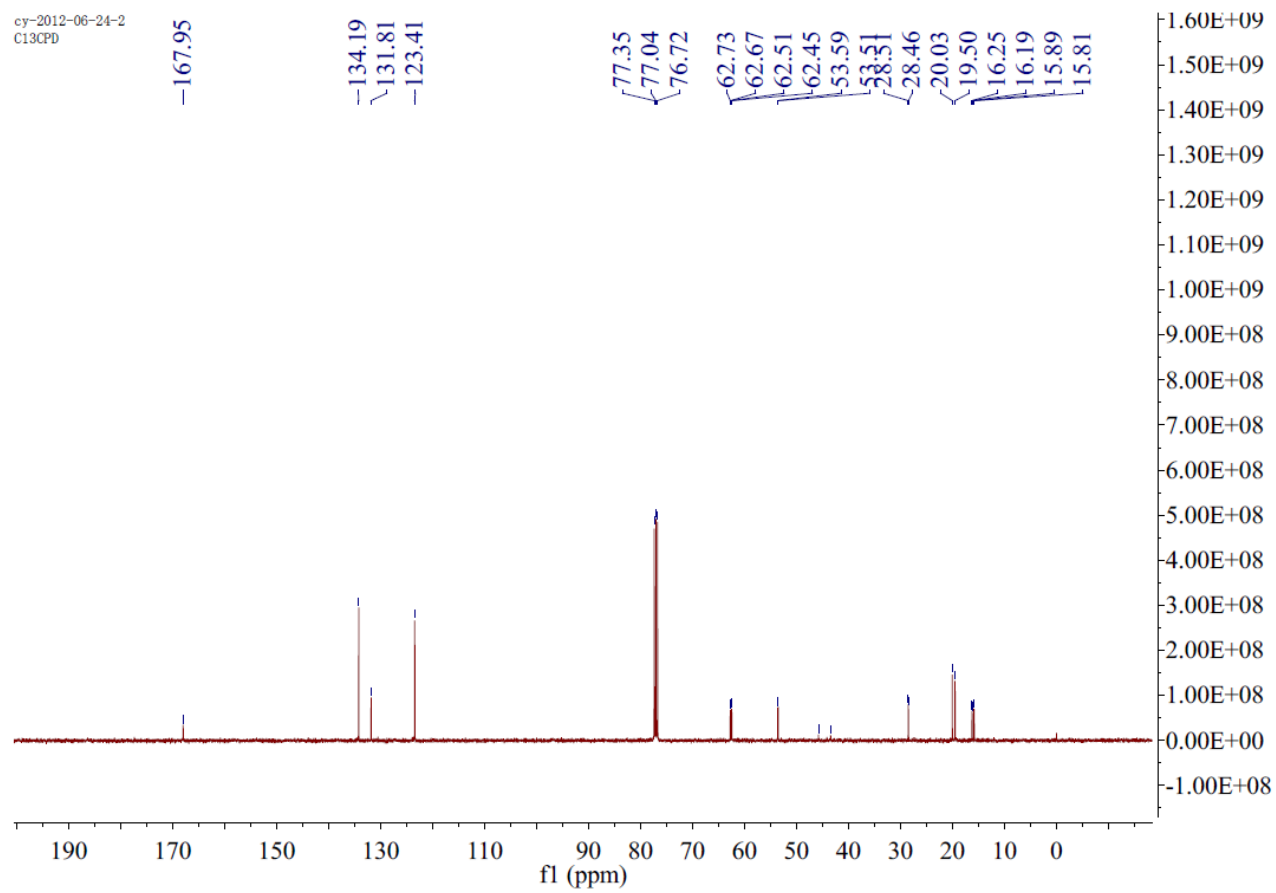

**(S)-Diethyl (1-diazo-2-(1,3-dioxoisindolin-2-yl)-4-methylpentyl)phosphonate (6e):**

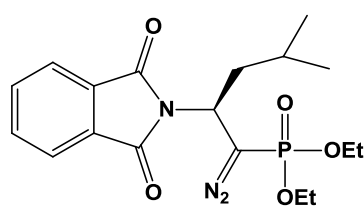

Yellow sticky oil; 46% overall yield;  $[\alpha]_D^{25}$  -184 (0.22, CH<sub>2</sub>Cl<sub>2</sub>); <sup>1</sup>H

NMR (400 MHz, CDCl<sub>3</sub>): δ 7.83-7.86 (m, 2H, Ph), 7.72-7.75 (m, 2H, Ph),

4.91 (dt, *J* = 8.9, 7.0 Hz, 1H, CH), 4.03-4.15 (m, 2H, OCH<sub>2</sub>), 3.82-4.02

(m, 2H, OCH<sub>2</sub>), 1.97-2.06 (m, 1H, CH), 1.77-1.87 (m, 1H, CH<sub>2</sub>), 1.52-1.62 (m, 1H, CH<sub>2</sub>), 1.32 (t, *J* =

7.1 Hz, 3H, CH<sub>3</sub>), 0.96-1.05 (m, 9H, 3CH<sub>3</sub>); <sup>13</sup>C NMR (101 MHz, CDCl<sub>3</sub>): δ 167.82 (C=O), 134.16,

131.89, 123.32 (Ph), 62.73 (d, *J* = 5.8 Hz, OCH<sub>2</sub>), 62.49 (d, *J* = 5.8 Hz, OCH<sub>2</sub>), 45.24 (d, *J* = 235.99 Hz,

C-P), 45.09 (d, *J* = 8.5 Hz, CH), 39.39 (d, *J* = 5.6 Hz, CH<sub>2</sub>), 25.03 (CH), 22.40 (CH<sub>3</sub>), 22.04 (CH<sub>3</sub>),

16.14 (d, *J* = 6.9 Hz, CH<sub>3</sub>), 15.81 (d, *J* = 6.9 Hz, CH<sub>3</sub>); <sup>31</sup>P NMR (162 MHz, CDCl<sub>3</sub>): δ 18.94 (s). ESI-

HRMS calcd for C<sub>18</sub>H<sub>24</sub>N<sub>3</sub>O<sub>5</sub>P: 394.1526 (M+H)<sup>+</sup>; Found: 394.1521.

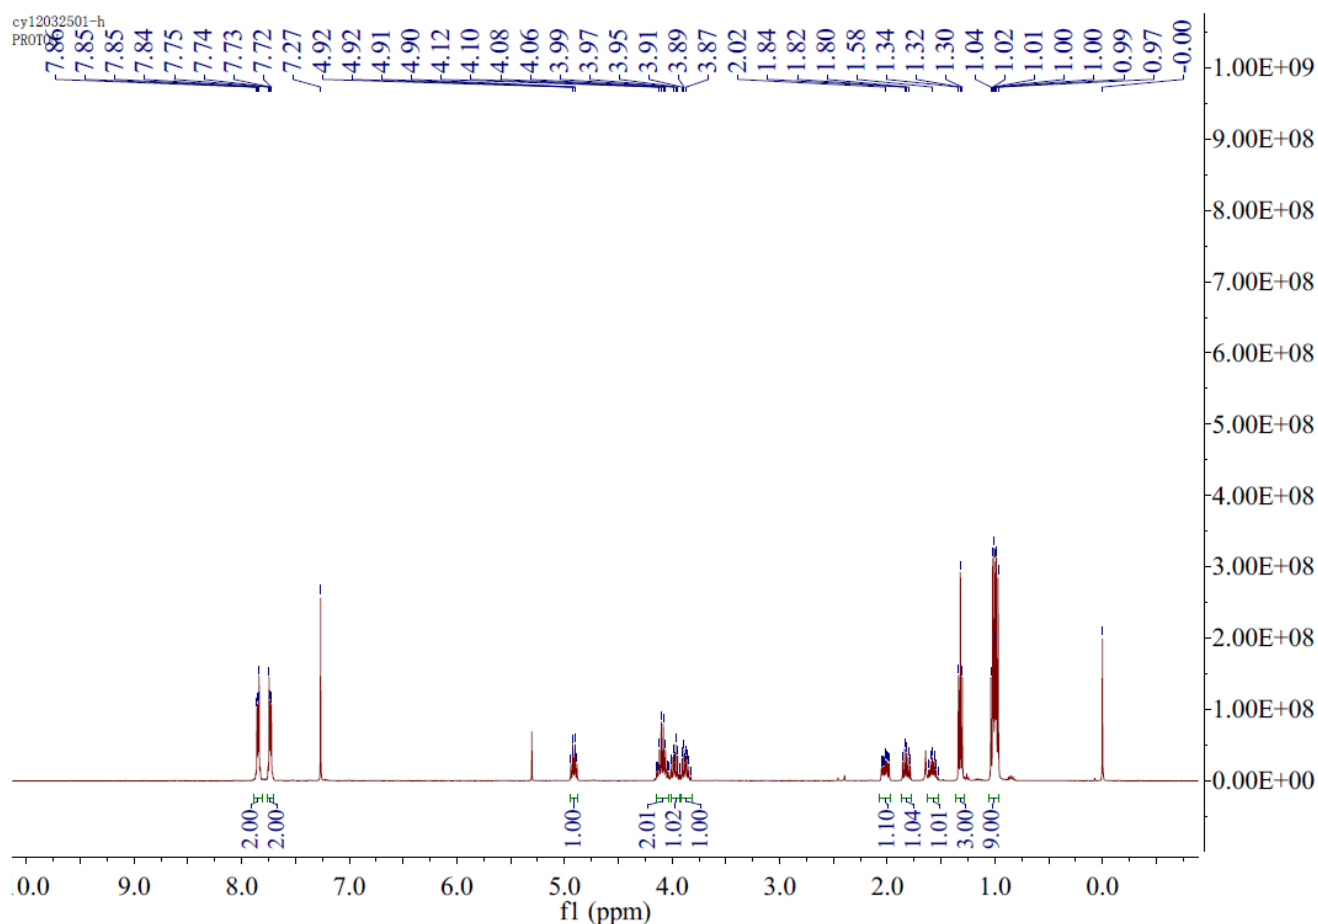

cy-2012-06-24-3  
C13CPD

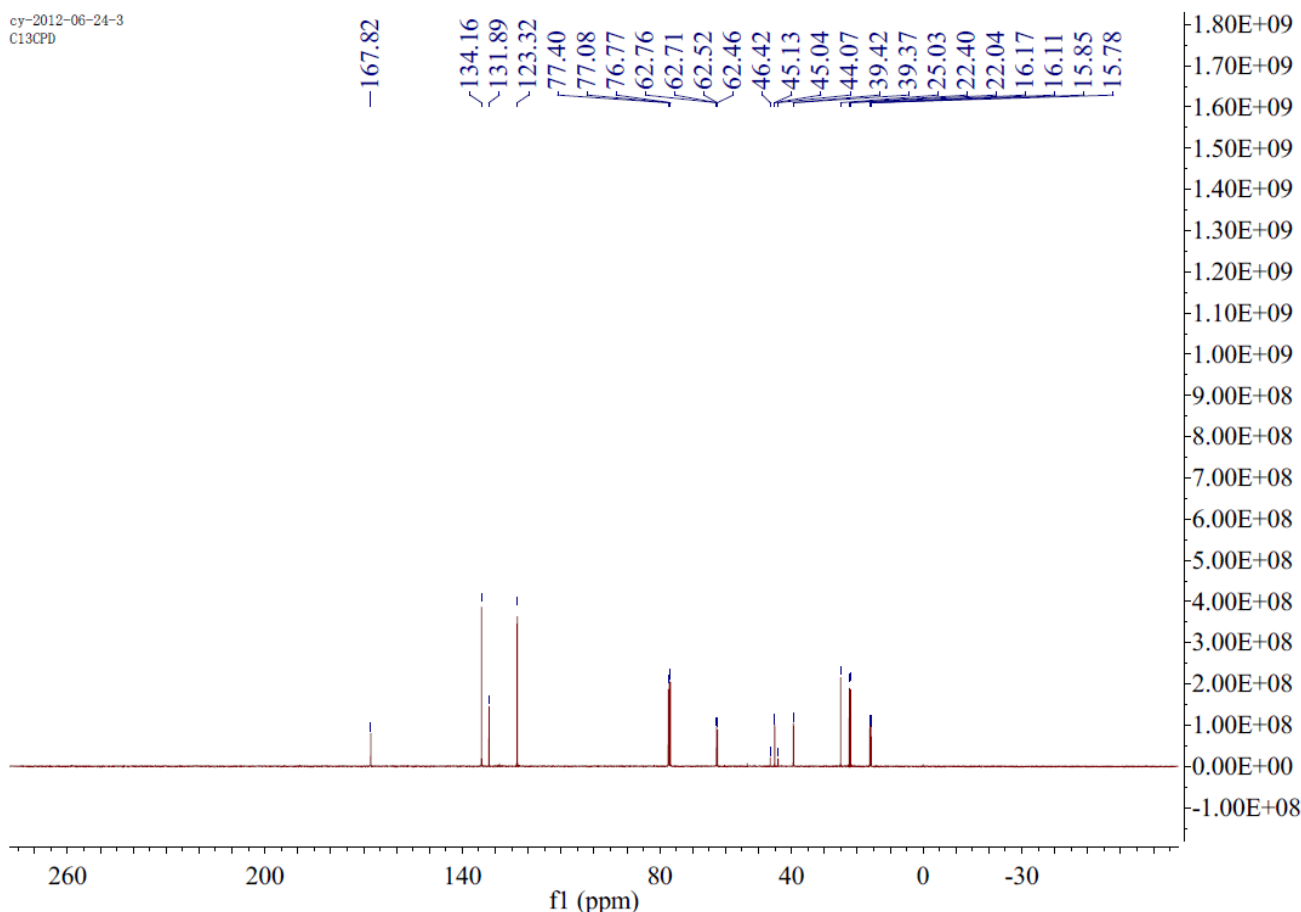

**Diethyl (1-diazo-2-(1,3-dioxisoindolin-2-yl)ethyl)phosphonate (6f):**

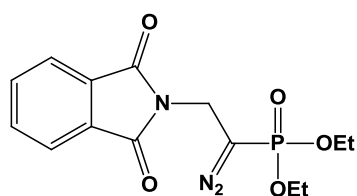

Yellow solid; 11% overall yield; mp 67-71 °C;  $^1\text{H}$  NMR (400 MHz,  $\text{CDCl}_3$ ):  $\delta$  7.87-7.90 (m, Ph), 7.73-7.78 (m, 2H, Ph), 4.49 (d,  $J = 11.3$  Hz, 2H,  $\text{CH}_2$ ), 4.01-4.15 (m, 4H,  $2\text{OCH}_2$ ), 1.25 (t,  $J = 7.1$  Hz, 6H,  $2\text{CH}_3$ );  $^{13}\text{C}$  NMR (101 MHz,  $\text{CDCl}_3$ ):  $\delta$  167.61 (C=O), 134.27, 131.98, 123.49 (Ph),

62.77 (d,  $J = 5.6$  Hz,  $\text{OCH}_2$ ), 42.04 (d,  $J = 235.9$  Hz, C-P), 34.38 (d,  $J = 9.4$  Hz,  $\text{CH}_2$ ), 16.05 (d,  $J = 6.7$  Hz,  $\text{CH}_3$ );  $^{31}\text{P}$  NMR (162 MHz,  $\text{CDCl}_3$ ):  $\delta$  18.36 (s). ESI-HRMS calcd for  $\text{C}_{14}\text{H}_{16}\text{N}_3\text{O}_5\text{P}$ : 338.0900 ( $\text{M}+\text{H}$ ) $^+$ ; Found: 338.0903.

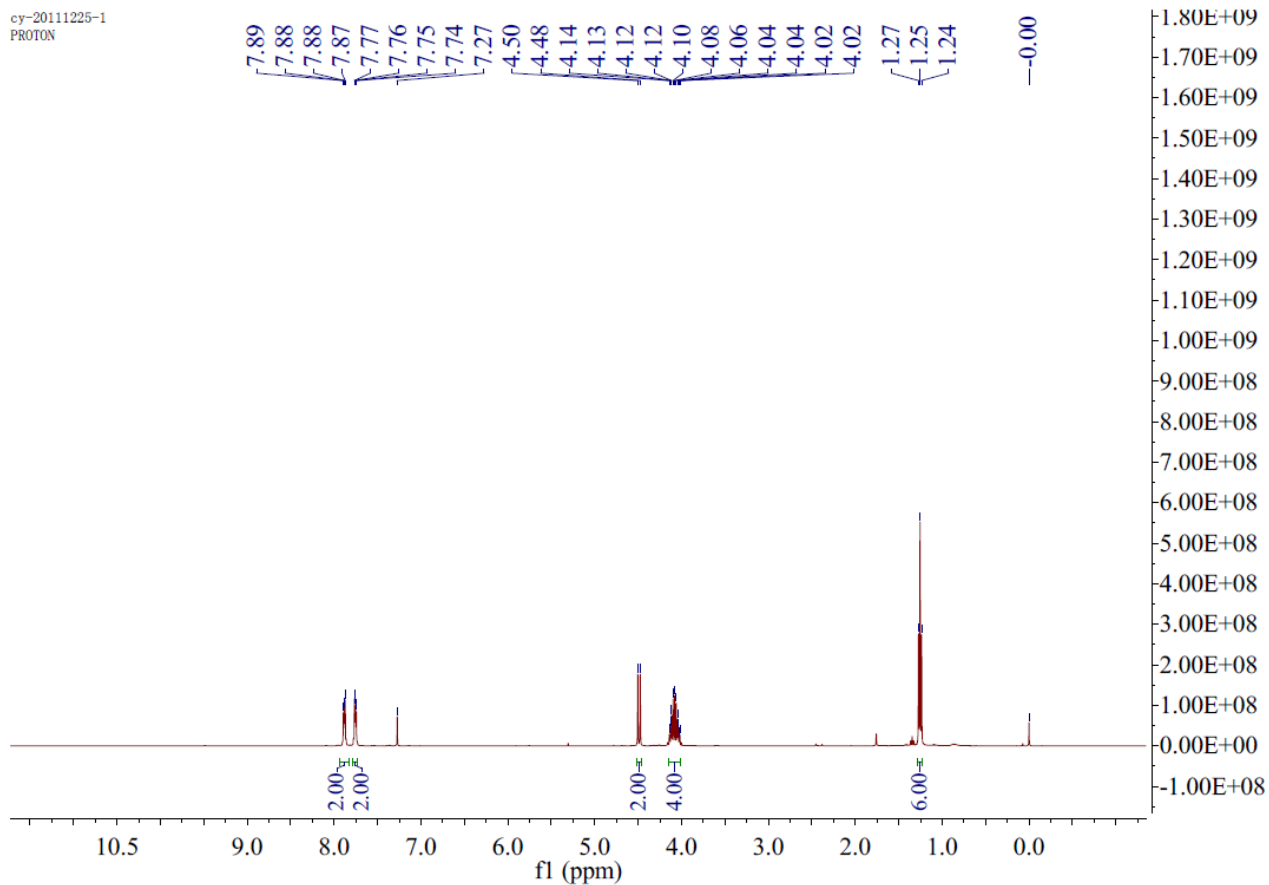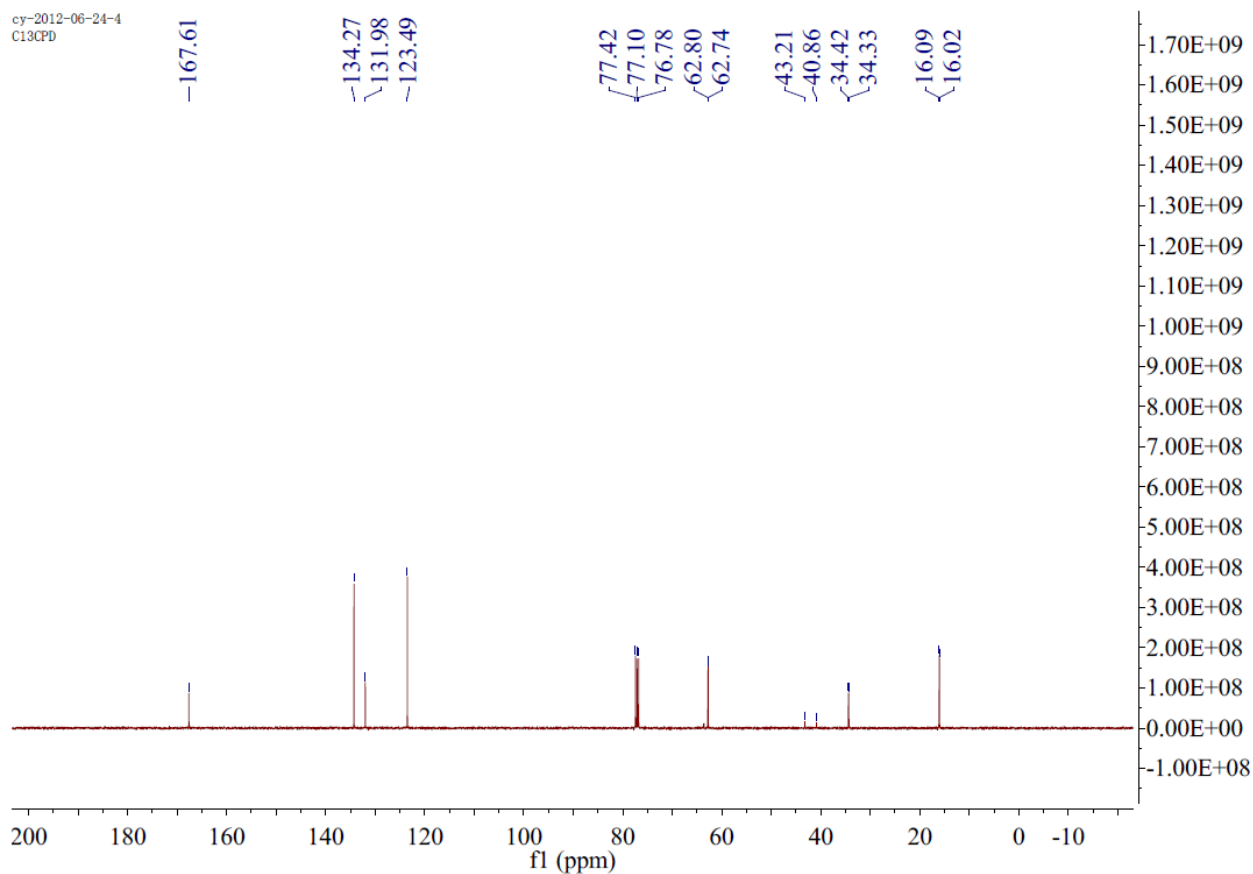

### General procedure for the preparation of 8:

The  $[\text{Cu}(\text{MeCN})_4]\text{PF}_6$  (0.014 mmol) and  $\text{I}_2$  (0.056 mmol) in an oven-dried Schlenk tube was dissolved in 4 mL of freshly distilled  $\text{CH}_2\text{Cl}_2$  under nitrogen, alcohol **7** (1.4 mmol) was added and the solution was stirred for 30 min at 25 °C.  $\alpha$ -Diazophosphonates **6** (0.28 mmol) was diluted with 2 mL of  $\text{CH}_2\text{Cl}_2$  and was drawn into a gastight syringe. It was then added to the reaction mixture dropwise over a period of 1.5h with the help of a syringe pump. After the addition was complete, the reaction mixture was stirred for another 3 hour at 25 °C. The solvent was then removed under reduced pressure and the crude residue was purified by silica gel chromatography with the eluent ( $\text{CH}_2\text{Cl}_2/\text{EtOAc} = 15:1$ ) or purified by preparative HPLC [HPLC condition: YMC-Pack ODS-A column,  $\text{MeOH}/\text{H}_2\text{O}$  (v/v) with the gradient from 20% to 100% in 20min, flow rate = 2 mL/min, wavelength = 254 nm] to give the corresponding products **8** and by-products **9**.

### Diethyl (2-(benzyloxy)-2-(1,3-dioxoisindolin-2-yl)propyl)phosphonate (8a):

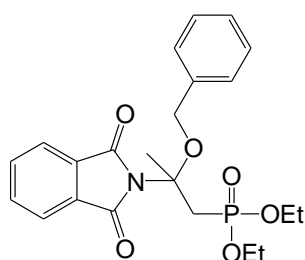

Colourless oil;  $^1\text{H}$  NMR (400 MHz,  $\text{CDCl}_3$ ):  $\delta$  7.81-7.86 (m, 2H, Ph), 7.70-7.75 (m, 2H, Ph), 7.34 (d,  $J = 7.2$  Hz, 2H, Ph), 7.16-7.31 (m, 3H, Ph), 4.62 (d,  $J = 11.2$  Hz, 1H,  $\text{OCH}_2\text{Ph}$ ), 4.46 (d,  $J = 11.2$  Hz, 1H,  $\text{OCH}_2\text{Ph}$ ), 3.92-4.08 (m, 4H,  $2\text{OCH}_2$ ), 3.66 (dd,  $J = 18.9, 15.7$  Hz, 1H,  $\text{CH}_2\text{-P}$ ), 2.49 (dd,  $J = 18.9, 15.7$  Hz, 1H,  $\text{CH}_2\text{-P}$ ), 2.29 (s, 1H,  $\text{CH}_3$ ), 1.19 (t,  $J = 7.1$  Hz, 3H,  $\text{CH}_3$ ), 1.11 (t,  $J = 7.1$  Hz, 3H,  $\text{CH}_3$ );  $^{13}\text{C}$  NMR (101 MHz,  $\text{CDCl}_3$ ):  $\delta$  168.70 (C=O), 137.39, 134.14, 131.70, 128.33, 127.72, 127.55, 123.17 (Ph), 88.93 (d,  $J = 1.4$  Hz, O-C-N), 64.76 (d,  $J = 1.4$  Hz,  $\text{OCH}_2\text{Ph}$ ), 61.91 (d,  $J = 6.5$  Hz,  $\text{OCH}_2$ ), 61.60 (d,  $J = 6.5$  Hz,  $\text{OCH}_2$ ), 36.55 (d,  $J = 140.0$  Hz, C-P), 24.12 ( $\text{CH}_3$ ), 16.21 (d,  $J = 6.4$  Hz,  $\text{CH}_3$ ), 16.09 (d,  $J = 6.4$  Hz,  $\text{CH}_3$ );  $^{31}\text{P}$  NMR (162 MHz,  $\text{CDCl}_3$ ):  $\delta$  24.34 (s). ESI-HRMS calcd for  $[\text{C}_{22}\text{H}_{26}\text{NO}_6\text{P}, \text{M}+\text{Na}]^+$ : 454.1390; Found: 454.1393.

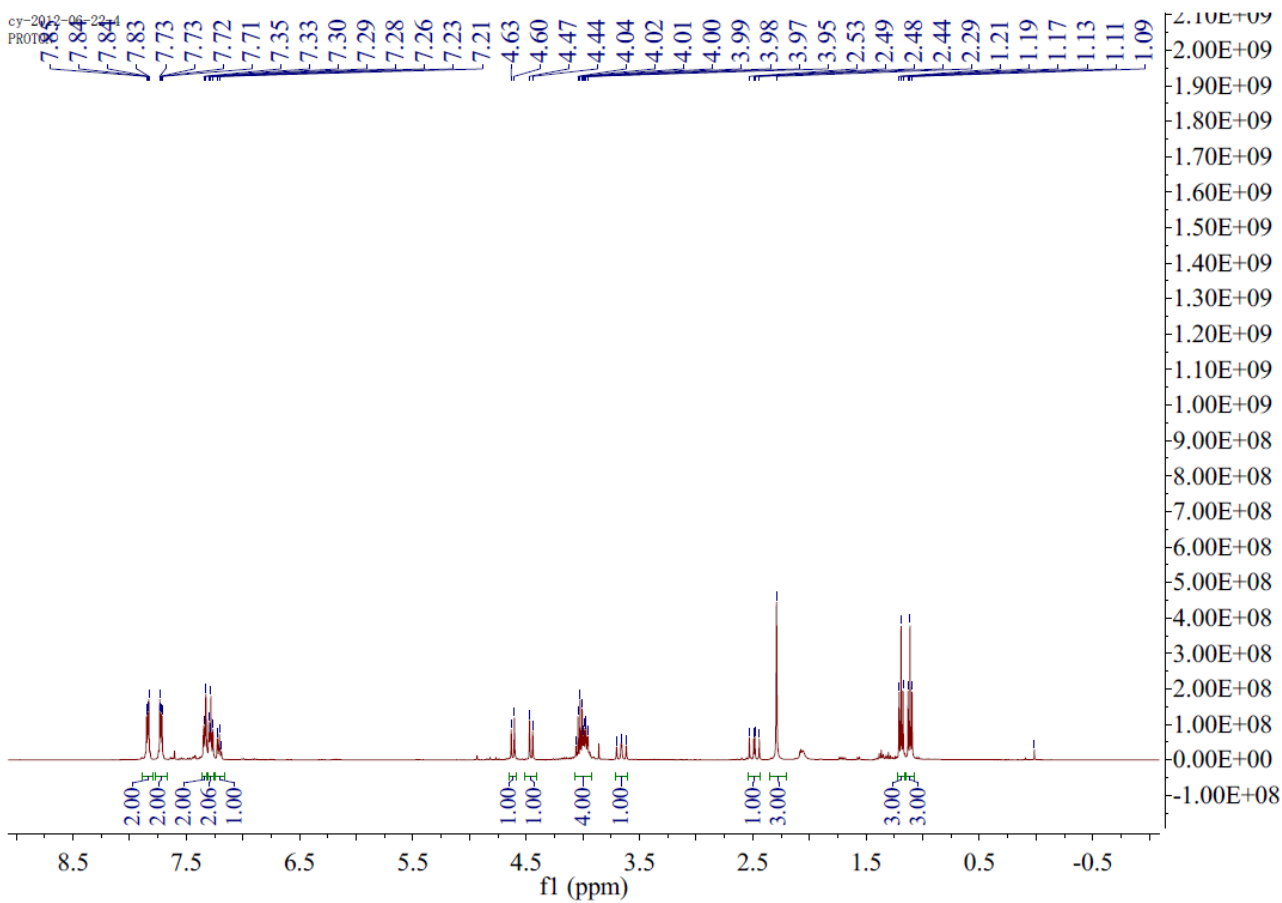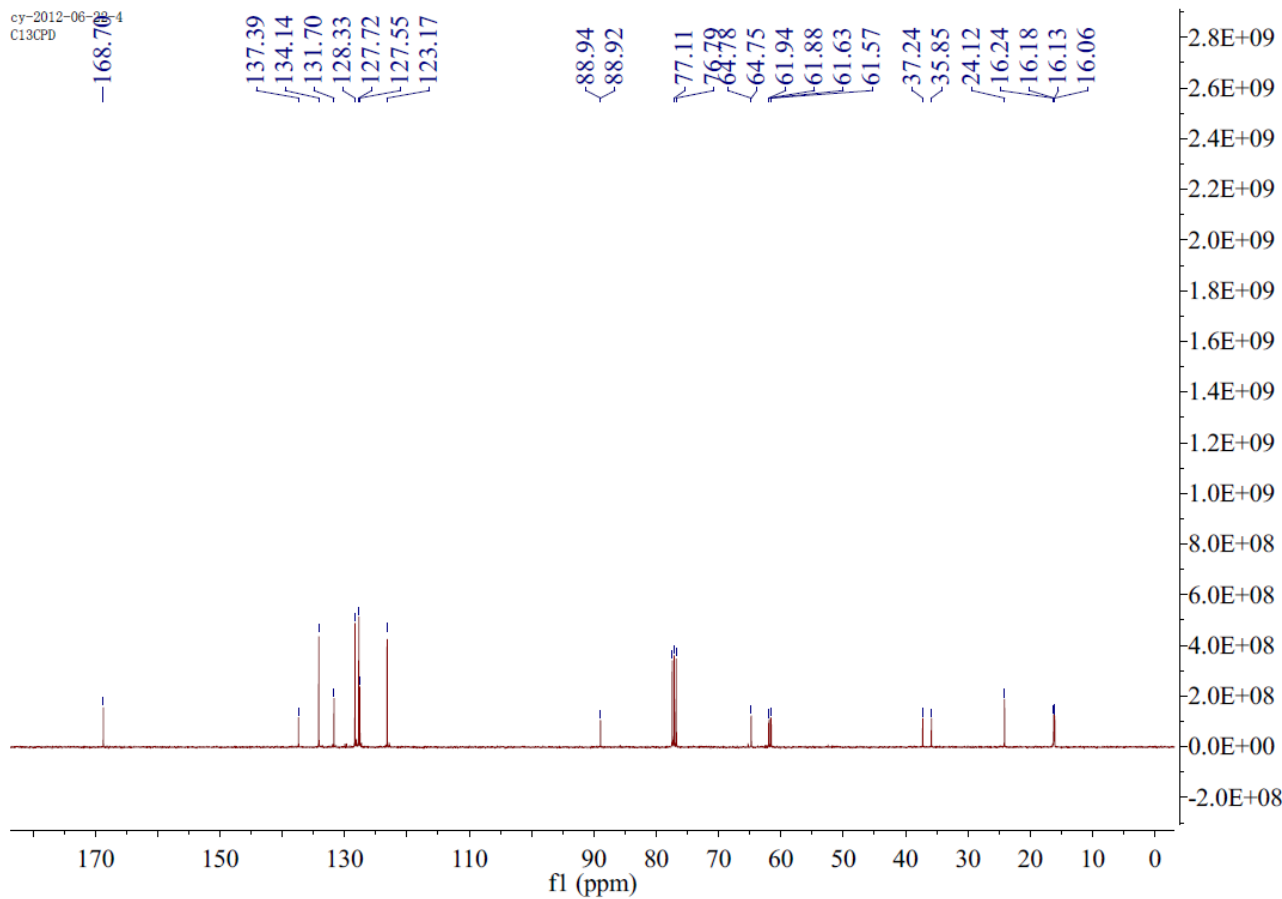

**Diethyl(2-(1,3-dioxoisindolin-2-yl)-2-((4-fluorobenzyl)oxy)propyl)phosphonate (8b):**

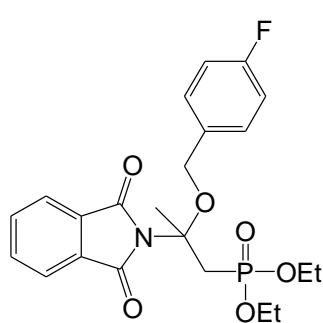

Light yellow oil;  $^1\text{H}$  NMR (400 MHz,  $\text{CDCl}_3$ ):  $\delta$  7.80-7.87 (m, 2H, Ph), 7.69-7.78 (m, 2H, Ph), 7.26-7.38 (m, 2H, Ph), 6.96 (t,  $J = 8.7$  Hz, 2H, Ph), 4.58 (d,  $J = 11.0$  Hz, 1H,  $\text{OCH}_2\text{Ar}$ ), 4.41 (d,  $J = 11.0$  Hz, 1H,  $\text{OCH}_2\text{Ar}$ ), 3.91-4.09 (m, 4H,  $2\text{OCH}_2$ ), 3.61 (dd,  $J = 18.9, 15.7$  Hz, 1H,  $\text{CH}_2\text{-P}$ ), 2.47 (dd,  $J = 18.9, 15.7$  Hz, 1H,  $\text{CH}_2\text{-P}$ ), 2.27 (s, 1H,  $\text{CH}_3$ ), 1.19 (t,  $J = 7.1$  Hz, 3H,  $\text{CH}_3$ ), 1.11 (t,  $J = 7.1$  Hz, 3H,  $\text{CH}_3$ );  $^{13}\text{C}$  NMR (101 MHz,  $\text{CDCl}_3$ ):  $\delta$  168.68 (C=O), 162.25 (d,  $J = 245.5$  Hz, C-F), 134.20 (Ph), 133.14 (d,  $J = 3.0$  Hz, Ar), 131.66 (Ph), 129.50 (d,  $J = 8.1$  Hz, Ar), 123.18 (Ph), 115.16 (d,  $J = 3.0$  Hz, Ar), 88.94 (d,  $J = 1.5$  Hz, O-C-N), 64.06 (d,  $J = 2.6$  Hz,  $\text{OCH}_2\text{Ph}$ ), 61.91 (d,  $J = 6.5$  Hz,  $\text{OCH}_2$ ), 61.61 (d,  $J = 6.5$  Hz,  $\text{OCH}_2$ ), 36.52 (d,  $J = 140.1$  Hz, C-P), 24.10 ( $\text{CH}_3$ ), 16.20 (d,  $J = 6.4$  Hz,  $\text{CH}_3$ ), 16.08 (d,  $J = 6.4$  Hz,  $\text{CH}_3$ );  $^{31}\text{P}$  NMR (162 MHz,  $\text{CDCl}_3$ ):  $\delta$  24.20 (s); ESI-HRMS calcd for  $[\text{C}_{22}\text{H}_{25}\text{FNO}_6\text{P}, \text{M}+\text{Na}]^+$ : 472.1296; Found: 472.1298.

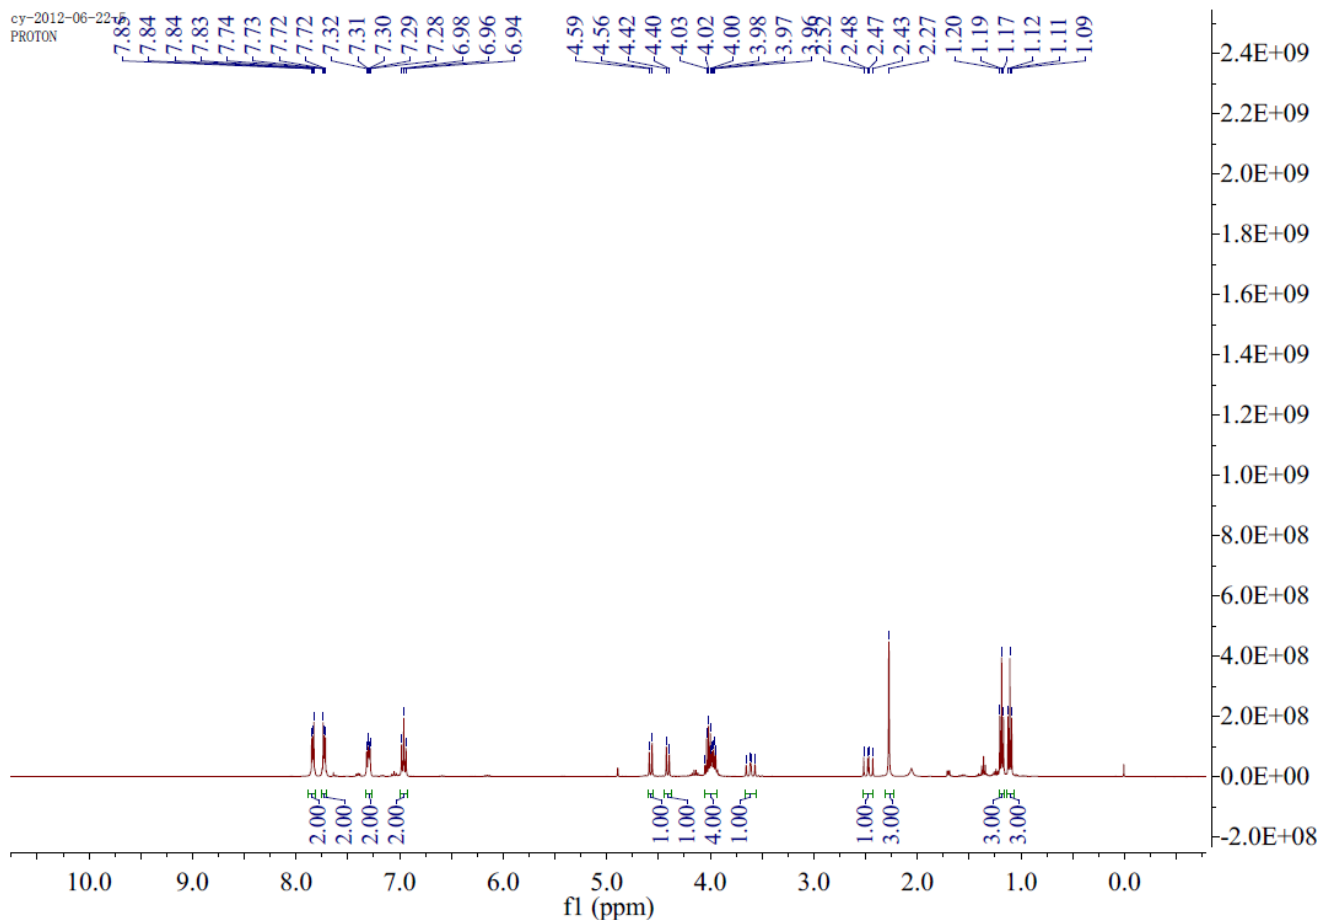

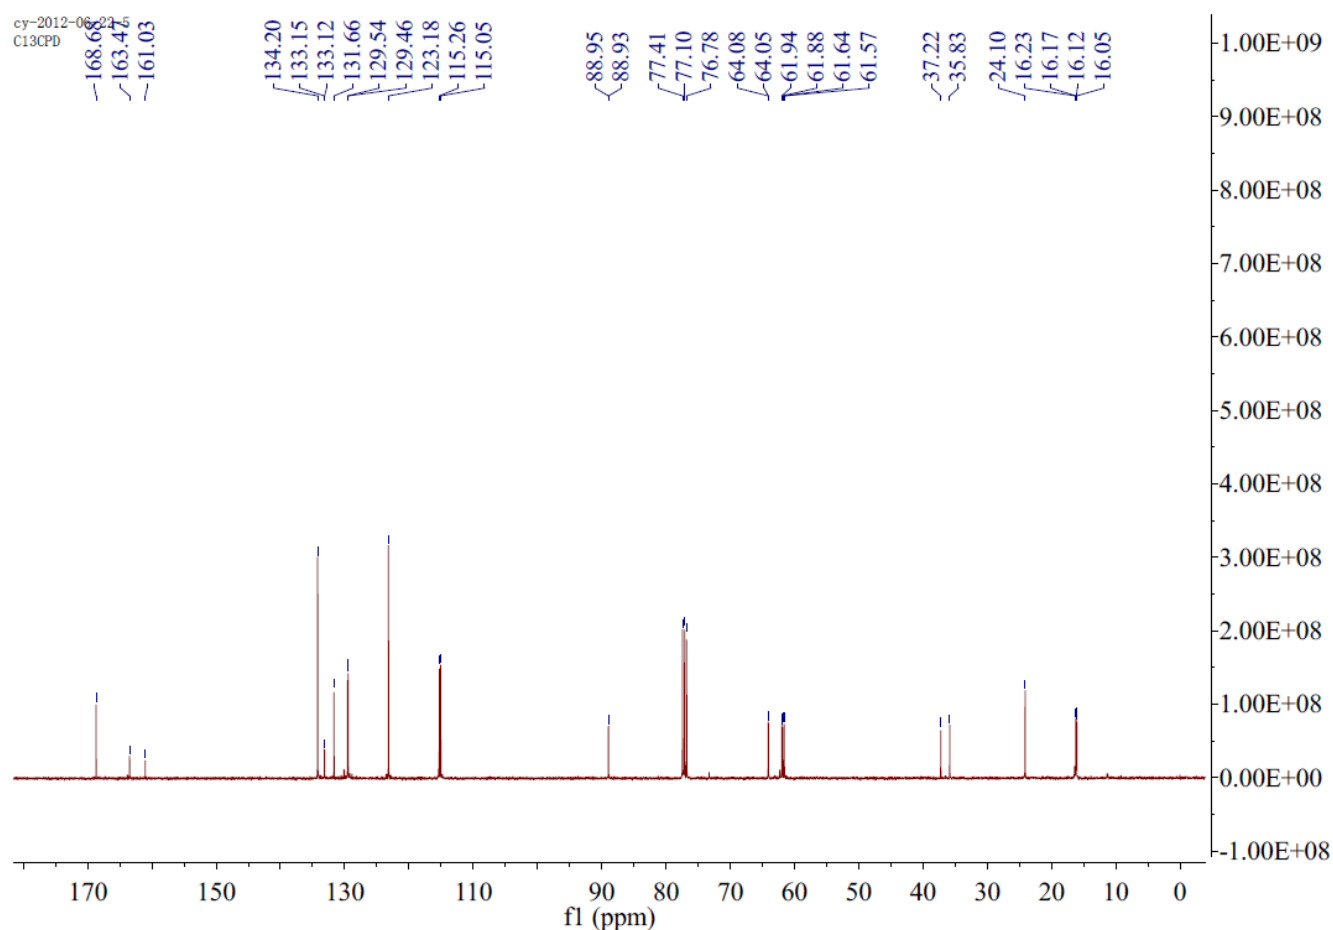

**Diethyl (2-(1,3-dioxoisindolin-2-yl)-2-((4-nitrobenzyl)oxy)propyl)phosphonate (8c):**

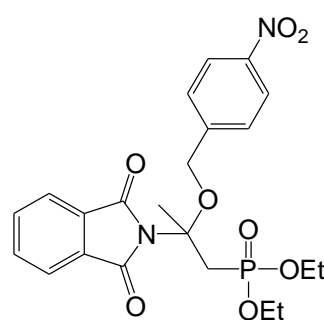

Colourless oil;  $^1\text{H}$  NMR (400 MHz,  $\text{CDCl}_3$ ):  $\delta$  8.17 (d,  $J = 7.7$  Hz, 2H, Ph), 7.83-7.87 (m, 2H, Ph), 7.71-7.78 (m, 2H, Ph), 7.55 (d,  $J = 7.7$  Hz, 2H, Ph), 4.74 (d,  $J = 12.7$  Hz, 1H,  $\text{OCH}_2\text{Ar}$ ), 4.58 (d,  $J = 12.7$  Hz, 1H,  $\text{OCH}_2\text{Ar}$ ), 3.97-4.08 (m, 4H,  $2\text{OCH}_2$ ), 3.64 (dd,  $J = 19.8, 15.8$  Hz, 1H,  $\text{CH}_2\text{-P}$ ), 2.53 (dd,  $J = 19.8, 15.8$ , 1H,  $\text{CH}_2\text{-P}$ ), 2.29 (s, 3H,  $\text{CH}_3$ ), 1.22 (t,  $J = 7.1$  Hz, 3H,  $\text{CH}_3$ ), 1.14 (t,  $J = 7.1$  Hz, 3H,  $\text{CH}_3$ );  $^{13}\text{C}$  NMR (101 MHz,  $\text{CDCl}_3$ )  $\delta$ : 168.64 (C=O), 147.26, 145.03, 134.32, 131.56, 127.89, 123.54, 123.26 (Ph), 89.17 (s, O-C-N), 63.57 (d,  $J = 2.3$  Hz,  $\text{OCH}_2\text{Ar}$ ), 61.93 (d,  $J = 6.6$  Hz,  $\text{OCH}_2$ ), 61.68 (d,  $J = 6.6$  Hz,  $\text{OCH}_2$ ), 36.41 (d,  $J = 140.5$  Hz, C-P), 24.11 ( $\text{CH}_3$ ), 16.23 (d,  $J = 6.3$  Hz,  $\text{CH}_3$ ), 16.12 (d,  $J = 6.3$  Hz,  $\text{CH}_3$ );  $^{31}\text{P}$  NMR (162 MHz,  $\text{CDCl}_3$ ):  $\delta$  23.87 (s); ESI-HRMS calcd for  $[\text{C}_{22}\text{H}_{25}\text{N}_2\text{O}_8\text{P}, \text{M}+\text{Na}]^+$ : 499.1241; Found: 499.1242.



cy-2013-01-07-3  
PROTON

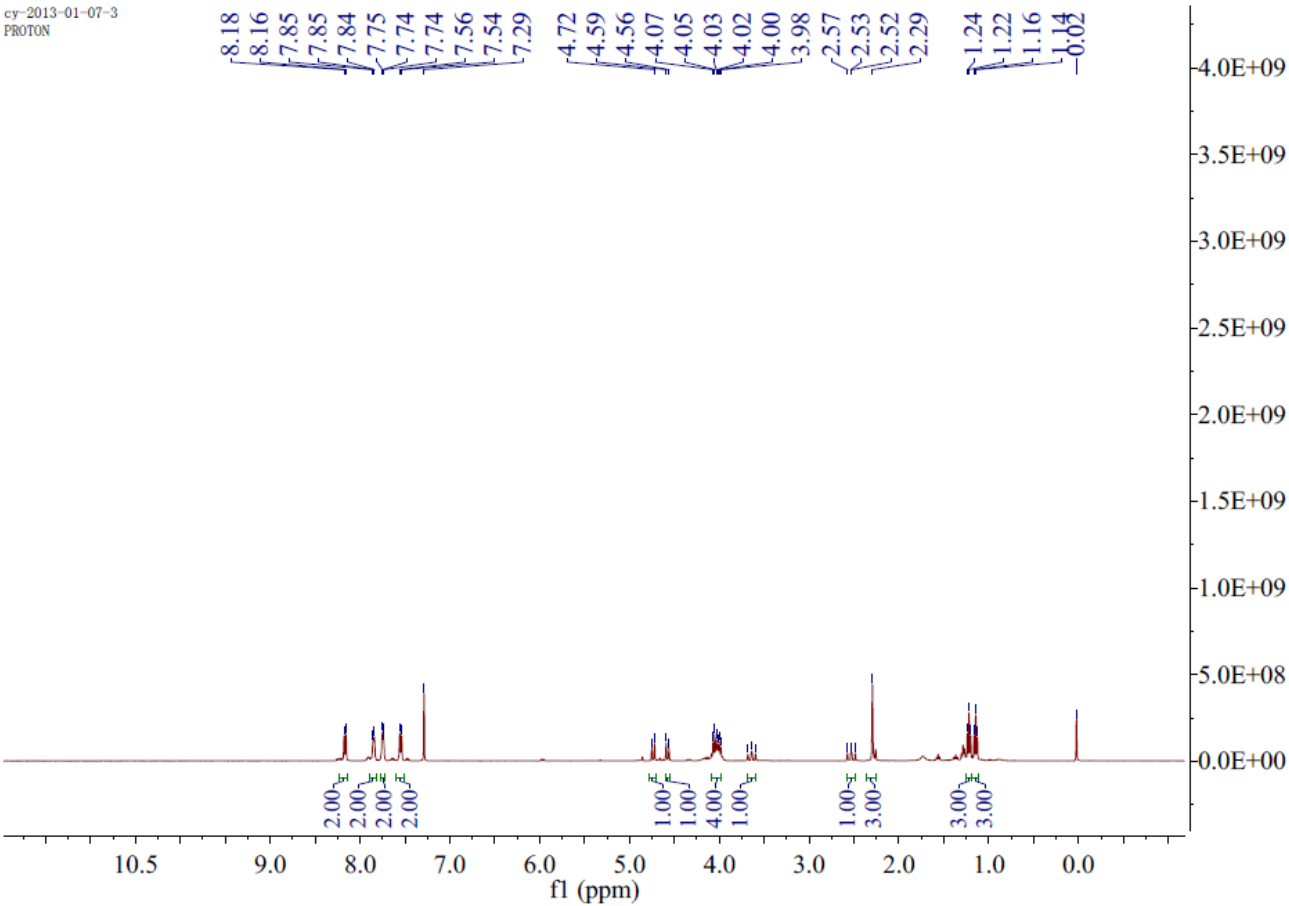

cy-2013-01-07-3  
TEST

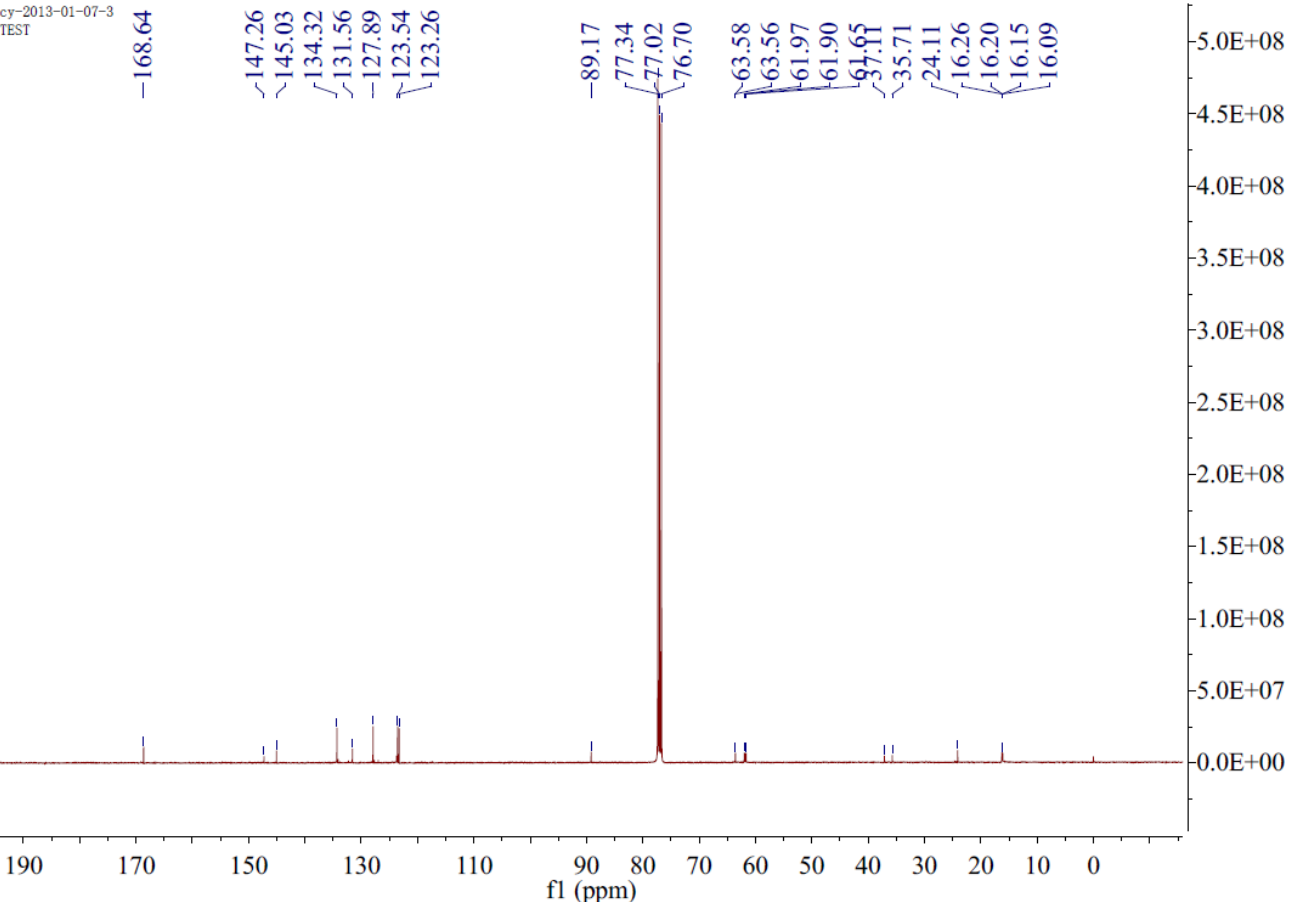

**Diethyl(2-(1,3-dioxoisindolin-2-yl)-2-((4-(trifluoromethyl)benzyl)oxy)propyl)phosphonate (8d):**

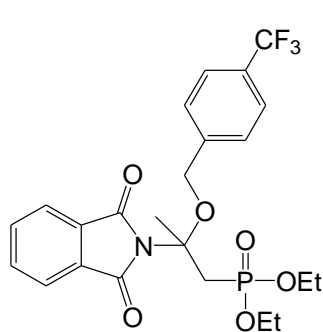

Colourless oil;  $^1\text{H}$  NMR (400 MHz,  $\text{CDCl}_3$ ):  $\delta$  7.80-7.88 (m, 2H, Ph), 7.70-7.77 (m, 2H, Ph), 7.54 (d,  $J = 7.9$  Hz, 2H, Ph), 7.47 (d,  $J = 7.9$  Hz, 2H, Ph), 4.69 (d,  $J = 11.9$  Hz, 1H,  $\text{OCH}_2\text{Ar}$ ), 4.53 (d,  $J = 11.9$  Hz, 1H,  $\text{OCH}_2\text{Ar}$ ), 3.93-4.11 (m, 4H,  $2\text{OCH}_2$ ), 3.59-3.73 (m, 1H,  $\text{CH}_2\text{-P}$ ), 2.45-2.58 (m, 1H,  $\text{CH}_2\text{-P}$ ), 2.29 (s, 3H,  $\text{CH}_3$ ), 1.21 (t,  $J = 7.0$  Hz, 3H,  $\text{CH}_3$ ), 1.13 (t,  $J = 7.0$  Hz, 3H,  $\text{CH}_3$ );  $^{13}\text{C}$  NMR (101 MHz,  $\text{CDCl}_3$ )  $\delta$ : 168.66 (C=O), 141.55, 134.21, 131.62 (Ph), 129.71 (d,  $J = 32.6$  Hz, Ph), 127.69 (Ph), 125.23 (q,  $J = 3.7$  Hz,  $\text{CF}_3$ ), 123.19 (Ph), 89.08 (O-C-N), 64.03 (d,  $J = 2.7$  Hz,  $\text{OCH}_2\text{Ar}$ ), 61.90 (d,  $J = 6.4$  Hz,  $\text{OCH}_2$ ), 61.64 (d,  $J = 6.4$  Hz,  $\text{OCH}_2$ ), 36.51 (d,  $J = 140.3$  Hz, C-P), 24.11 ( $\text{CH}_3$ ), 16.21 (d,  $J = 6.2$  Hz,  $\text{CH}_3$ ), 16.10 (d,  $J = 6.2$  Hz,  $\text{CH}_3$ );  $^{31}\text{P}$  NMR (162 MHz,  $\text{CDCl}_3$ ):  $\delta$  24.06 (s); ESI-HRMS calcd for  $[\text{C}_{23}\text{H}_{25}\text{F}_3\text{NO}_6\text{P}, \text{M}+\text{Na}]^+$ : 522.1264; Found: 522.1266.

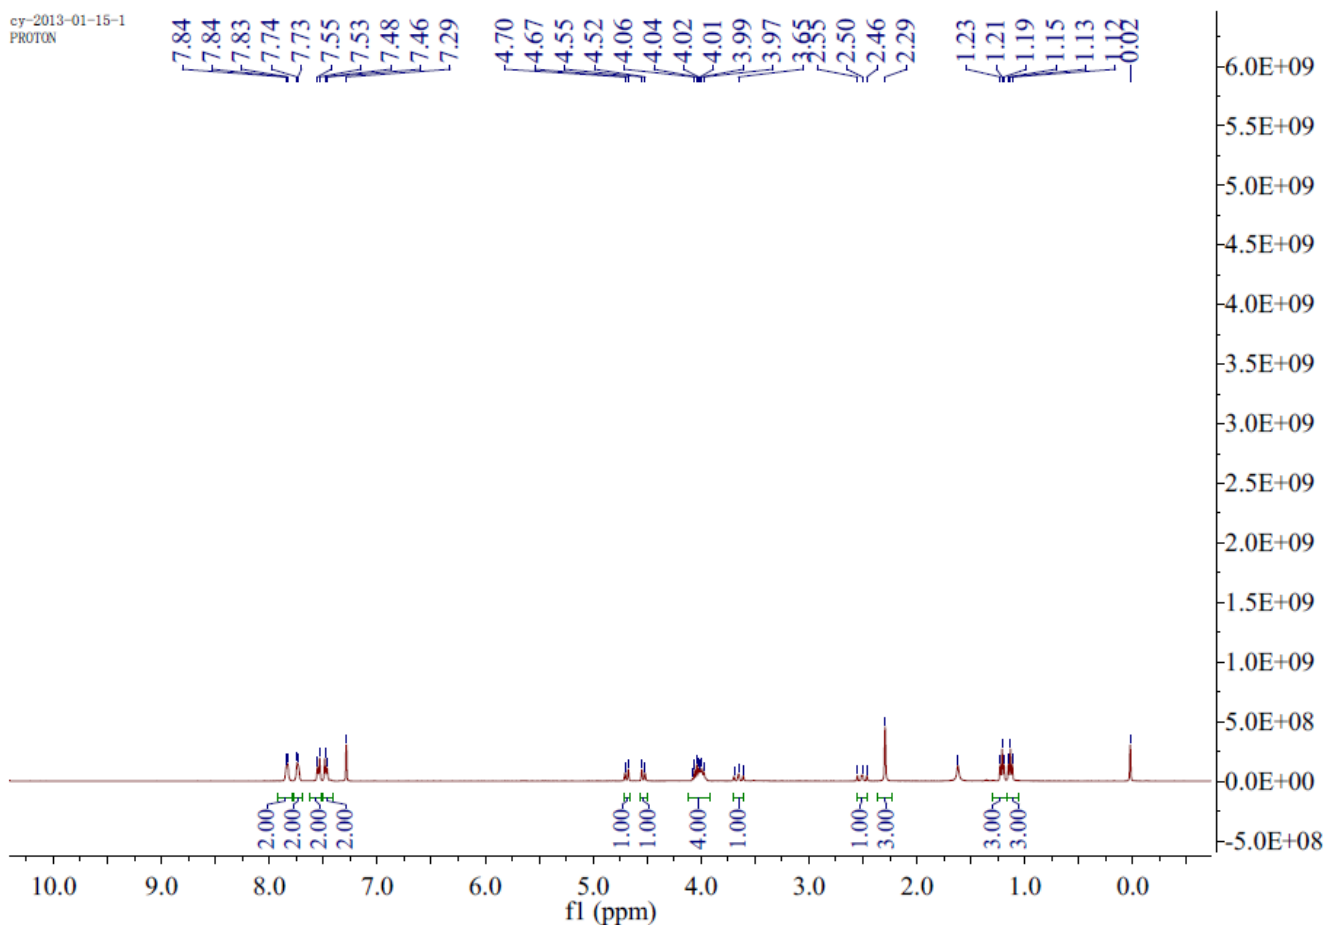

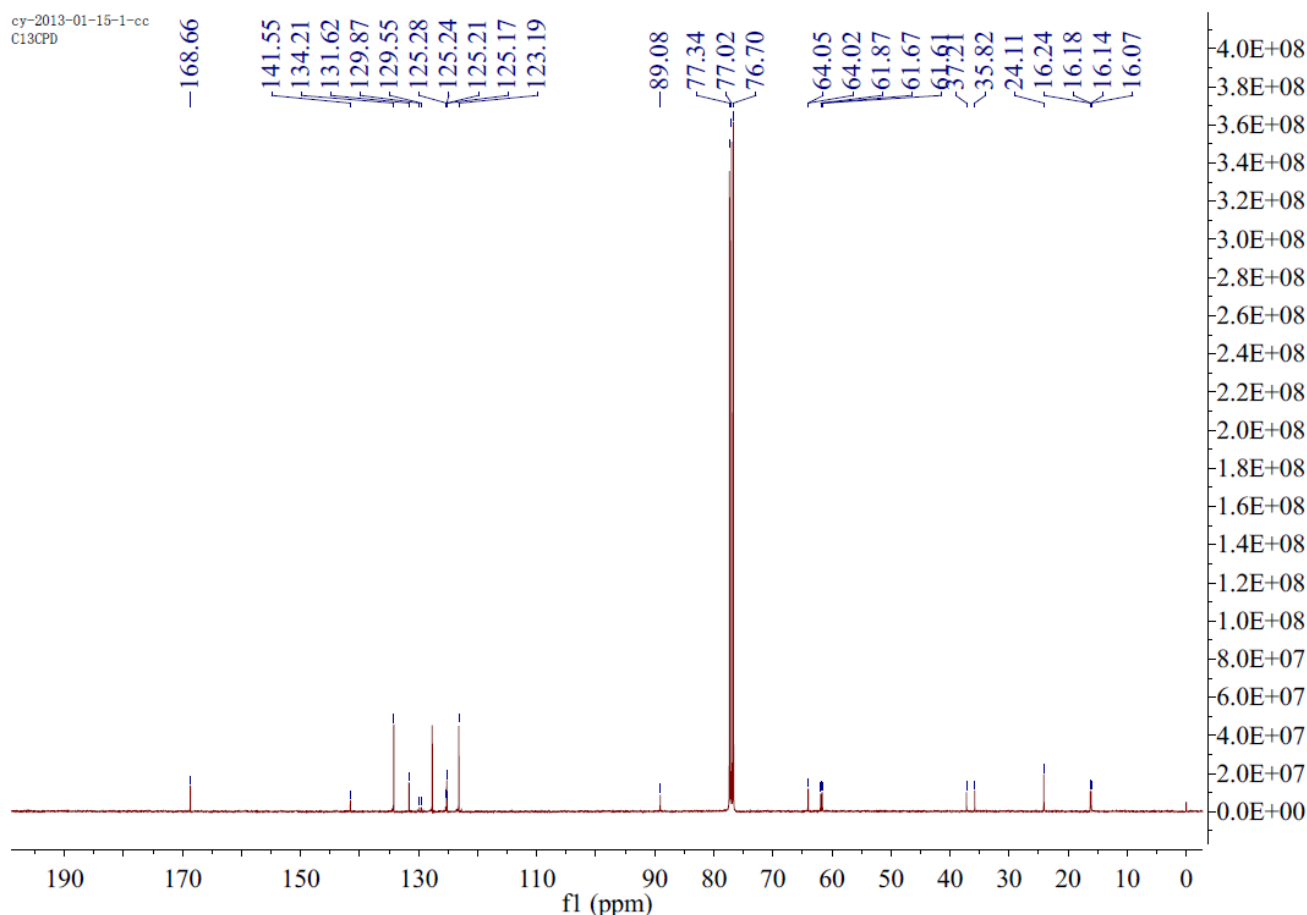

**Diethyl (2-(1,3-dioxoisindolin-2-yl)-2-((4-methylbenzyl)oxy)propyl)phosphonate (8e):**

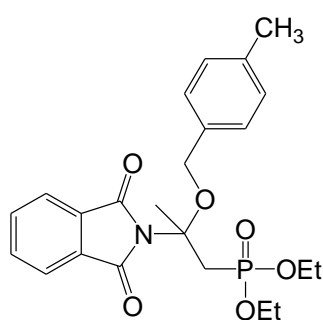

Colourless oil;  $^1\text{H}$  NMR (400 MHz,  $\text{CDCl}_3$ ):  $\delta$  7.78-7.83 (m, 2H, Ph), 7.68-7.73 (m, 2H, Ph), 7.19 (d,  $J = 8.0$  Hz, 2H, Ph), 7.06 (d,  $J = 8.0$  Hz, 2H, Ph), 4.56 (d,  $J = 11.0$  Hz, 1H,  $\text{OCH}_2\text{Ph}$ ), 4.40 (d,  $J = 11.0$  Hz, 1H,  $\text{OCH}_2\text{Ph}$ ), 3.90-4.06 (m, 4H,  $2\text{OCH}_2$ ), 3.63 (dd,  $J = 18.9, 15.7$  Hz, 1H,  $\text{CH}_2\text{-P}$ ), 2.45 (dd,  $J = 18.9, 15.7$  Hz, 1H,  $\text{CH}_2\text{-P}$ ), 2.26 (s, 3H,  $\text{CH}_3$ ), 2.25 (s, 3H,  $\text{CH}_3$ ),

1.18 (t,  $J = 7.1$  Hz, 3H,  $\text{CH}_3$ ), 1.10 (t,  $J = 7.1$  Hz, 3H,  $\text{CH}_3$ );  $^{13}\text{C}$  NMR (101 MHz,  $\text{CDCl}_3$ ):  $\delta$  168.68 (s,  $\text{C=O}$ ), 137.25, 134.31, 134.06, 131.73, 128.99, 127.82, 123.12 (Ph), 88.85 (O-C-N), 64.70 (d,  $J = 2.6$  Hz,  $\text{OCH}_2\text{Ar}$ ), 61.88 (d,  $J = 6.3$  Hz,  $\text{OCH}_2$ ), 61.57 (d,  $J = 6.3$  Hz,  $\text{OCH}_2$ ), 36.60 (d,  $J = 140.0$  Hz, C-P), 24.10 ( $\text{CH}_3$ ), 21.09 ( $\text{CH}_3$ ), 16.20 (d,  $J = 6.5$  Hz,  $\text{CH}_3$ ), 16.08 (d,  $J = 6.5$  Hz,  $\text{CH}_3$ );  $^{31}\text{P}$  NMR (162 MHz,  $\text{CDCl}_3$ ):  $\delta$  24.40 (s); ESI-HRMS calcd for  $[\text{C}_{23}\text{H}_{28}\text{NO}_6\text{P}, \text{M}+\text{Na}]^+$ : 468.1546; Found: 468.1545.

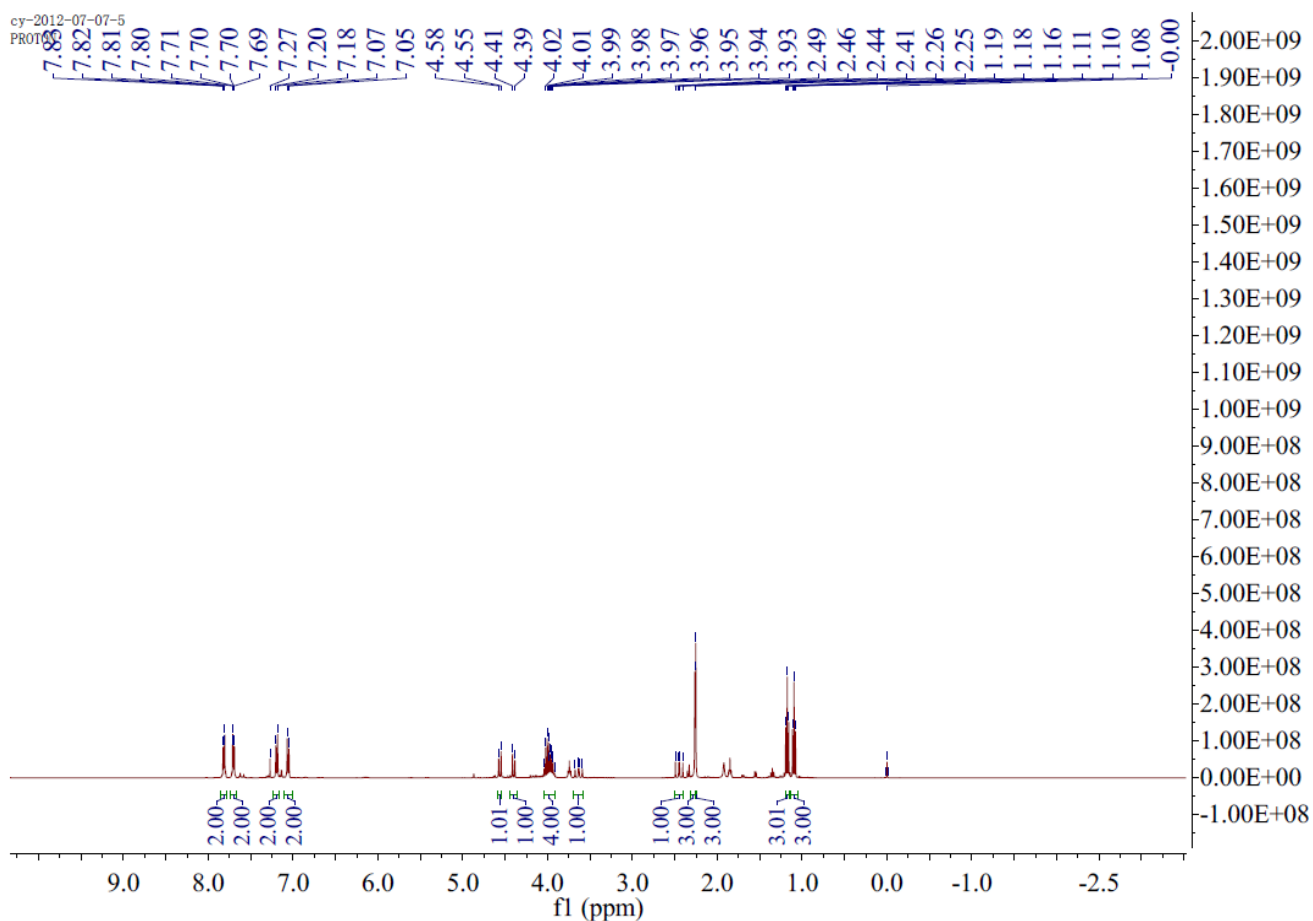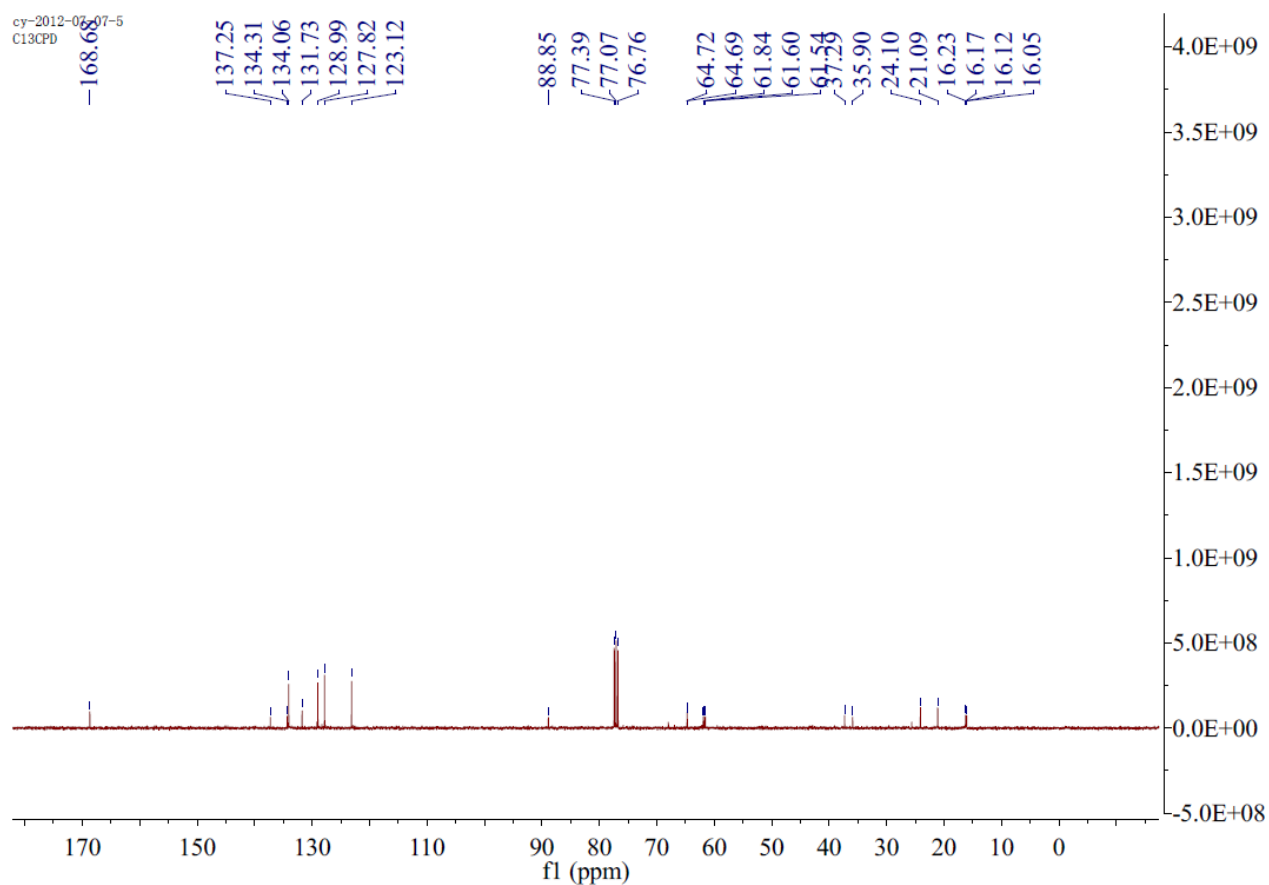

**Diethyl(2-(1,3-dioxoisindolin-2-yl)-2-((2,4,6-trimethylbenzyl)oxy)propyl)phosphonate (8f):**

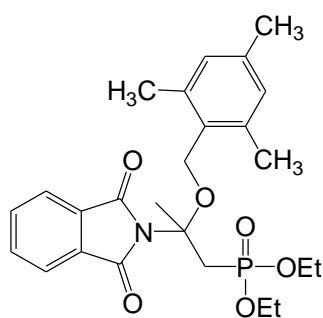

Colourless oil;  $^1\text{H}$  NMR (400 MHz,  $\text{CDCl}_3$ ):  $\delta$  7.86-7.91 (m, 2H, Ph), 7.73-7.79 (m, 2H, Ph), 6.82 (s, 2H, Ph), 4.63 (d,  $J = 9.4$  Hz, 1H,  $\text{OCH}_2\text{Ar}$ ), 4.34 (d,  $J = 9.4$  Hz, 1H,  $\text{OCH}_2\text{Ar}$ ), 3.93-4.10 (m, 4H,  $2\text{OCH}_2$ ), 3.65-3.78 (m, 1H,  $\text{CH}_2\text{-P}$ ), 2.38-2.45 (m, 1H,  $\text{CH}_2\text{-P}$ ), 2.36 (s, 3H,  $\text{CH}_3$ ), 2.29 (s, 6H,  $2\text{CH}_3$ ), 2.23 (s, 1H,  $\text{CH}_3$ ), 1.18 (t,  $J = 7.0$  Hz, 3H,  $\text{CH}_3$ ), 1.10 (t,  $J = 7.0$  Hz, 1H,  $\text{CH}_3$ ).  $^{13}\text{C}$  NMR (101 MHz,  $\text{CDCl}_3$ ):  $\delta$  168.80 (C=O), 138.00, 137.88, 134.18, 131.73, 129.94, 129.04, 123.18 (Ph), 88.47 (O-C-N), 61.81 (d,  $J = 6.5$  Hz,  $\text{OCH}_2$ ), 61.50 (d,  $J = 6.5$  Hz,  $\text{OCH}_2$ ), 58.58 (d,  $J = 2.8$  Hz,  $\text{CH}_2\text{Ar}$ ), 36.43 (d,  $J = 139.0$  Hz, C-P), 23.77 ( $\text{CH}_3$ ), 20.96 ( $\text{CH}_3$ ), 19.35 ( $\text{CH}_3$ ), 16.19 (d,  $J = 6.5$  Hz,  $\text{CH}_3$ ), 16.09 (d,  $J = 6.5$  Hz,  $\text{CH}_3$ ).  $^{31}\text{P}$  NMR (162 MHz,  $\text{CDCl}_3$ ):  $\delta$  24.58 (s); ESI-HRMS calcd for  $[\text{C}_{25}\text{H}_{32}\text{NO}_6\text{P}, \text{M}+\text{Na}]^+$ : 496.1859; Found: 496.1862.

cy-2013-01-07-1  
PROTON

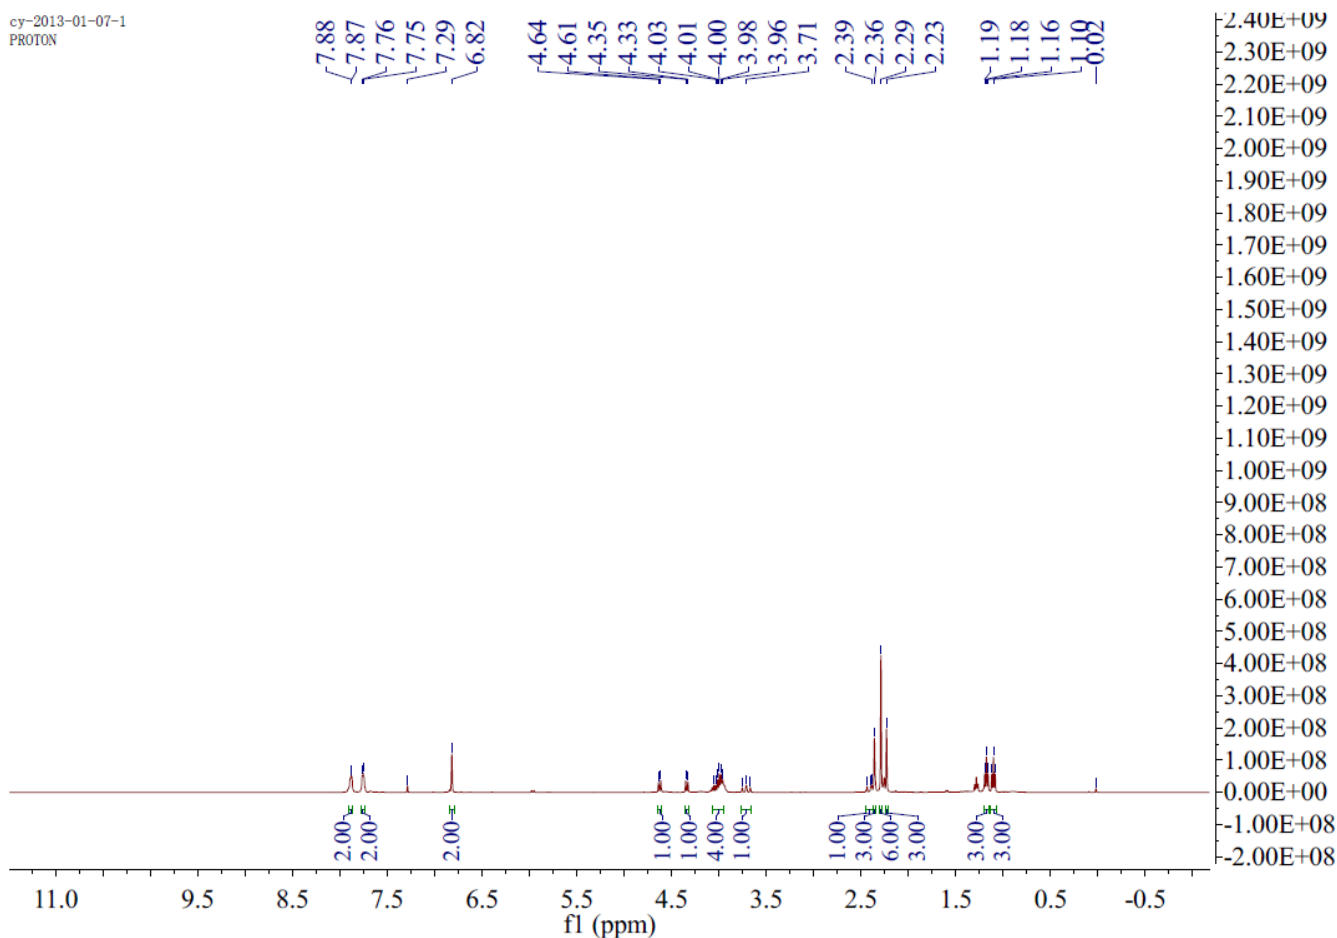

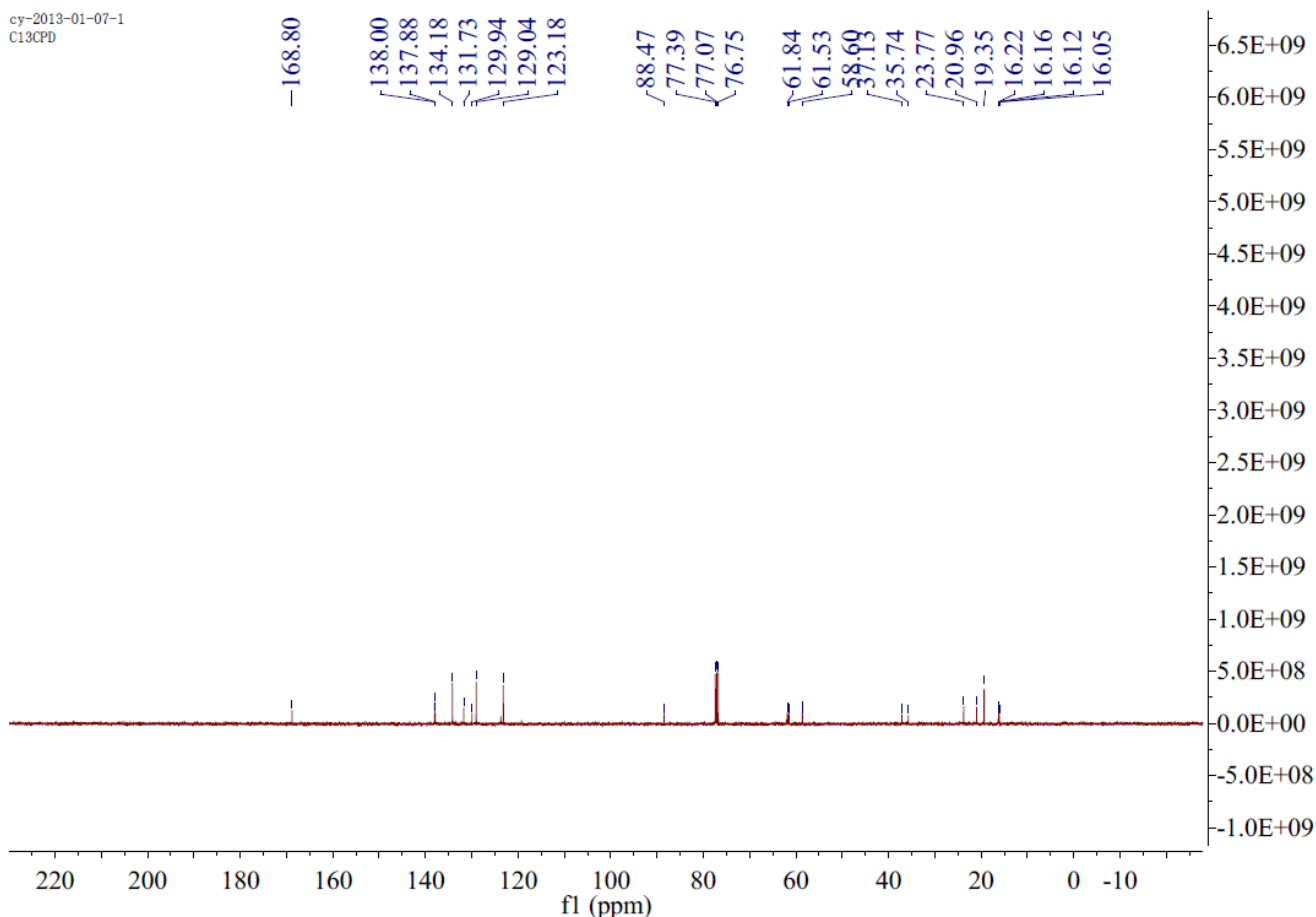

**Diethyl(2-(1,3-dioxoisindolin-2-yl)-2-((4-methoxybenzyl)oxy)propyl)phosphonate (8g):**

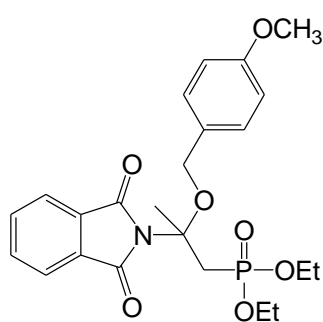

Colourless oil;  $^1\text{H}$  NMR (400 MHz,  $\text{CDCl}_3$ ):  $\delta$  7.80-7.85 (m, 2H, Ph), 7.68-7.74 (m, 2H, Ph), 7.23 (d,  $J = 8.7$  Hz, 2H, Ph), 6.79 (d,  $J = 8.7$  Hz, 2H, Ph), 4.54 (d,  $J = 10.8$  Hz, 1H,  $\text{OCH}_2\text{Ph}$ ), 4.37 (d,  $J = 10.8$  Hz, 1H,  $\text{OCH}_2\text{Ph}$ ), 3.93-4.05 (m, 4H,  $2\text{OCH}_2$ ), 3.74 (s, 3H, OMe), 3.61 (dd,  $J = 18.9, 15.7$  Hz, 1H,  $\text{CH}_2\text{-P}$ ), 2.45 (dd,  $J = 18.9, 15.7$  Hz, 1H,  $\text{CH}_2\text{-P}$ ), 2.26 (s, 3H,  $\text{CH}_3$ ), 1.17 (t,  $J = 7.1$  Hz, 3H,  $\text{CH}_3$ ), 1.09 (t,  $J = 7.1$  Hz, 3H,  $\text{CH}_3$ );  $^{13}\text{C}$  NMR (101 MHz,  $\text{CDCl}_3$ ):  $\delta$  168.68 (C=O), 159.12, 134.06, 131.75, 129.46, 129.32, 123.12, 113.75 (Ph), 88.84 (O-C-N), 64.50 (d,  $J = 2.4$  Hz,  $\text{OCH}_2\text{Ar}$ ), 61.88 (d,  $J = 6.4$  Hz,  $\text{OCH}_2$ ), 61.56 (d,  $J = 6.4$  Hz,  $\text{OCH}_2$ ), 55.23 ( $\text{OCH}_3$ ), 36.62 (d,  $J = 139.8$  Hz, C-P), 24.10 ( $\text{CH}_3$ ), 16.20 (d,  $J = 6.4$  Hz,  $\text{CH}_3$ ), 16.08 (d,  $J = 6.4$  Hz,  $\text{CH}_3$ );  $^{31}\text{P}$  NMR (162 MHz,  $\text{CDCl}_3$ ):  $\delta$  24.37 (s); ESI-HRMS calcd for  $[\text{C}_{23}\text{H}_{28}\text{NO}_7\text{P}, \text{M}+\text{Na}]^+$ : 484.1501; Found: 484.1504.

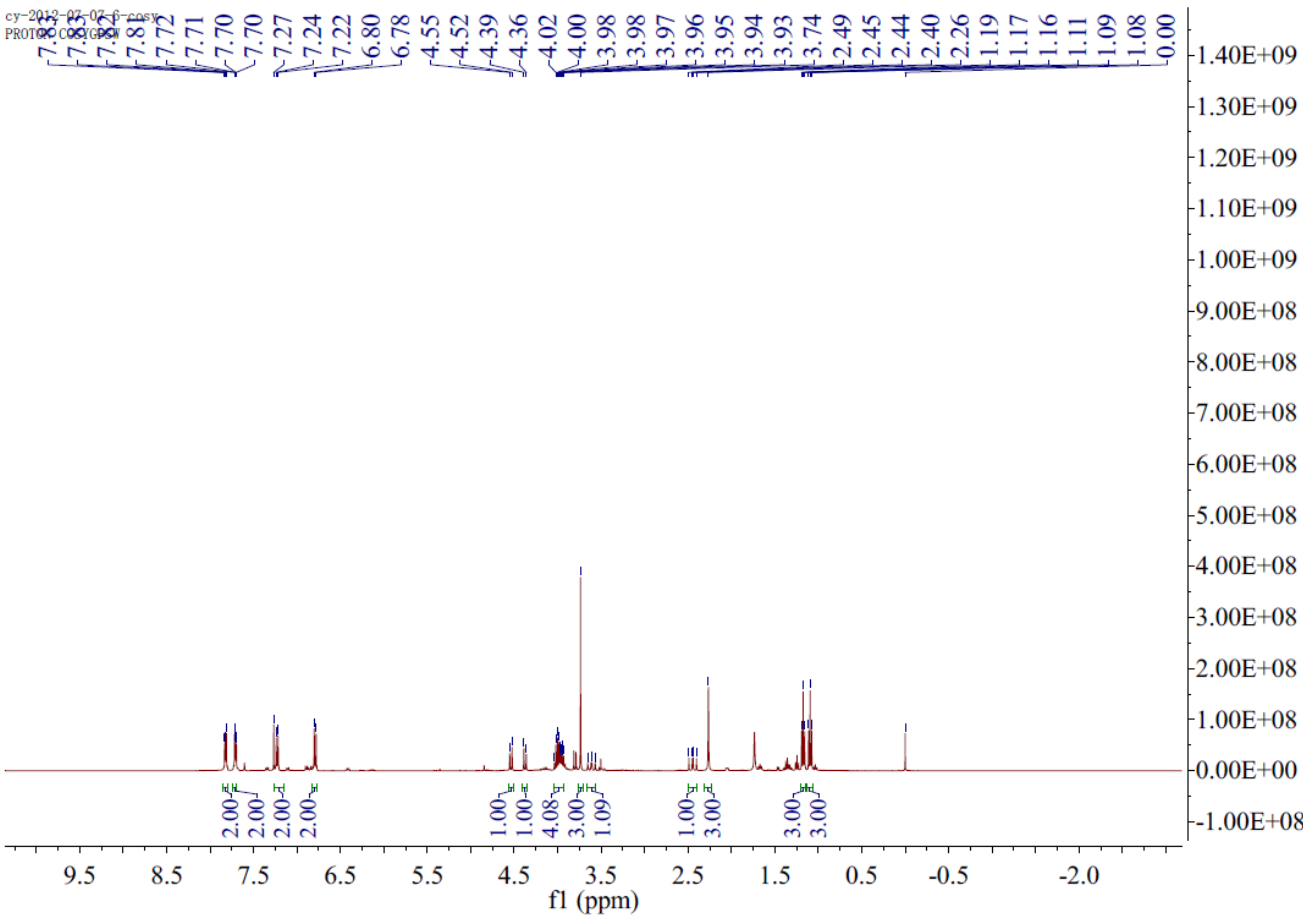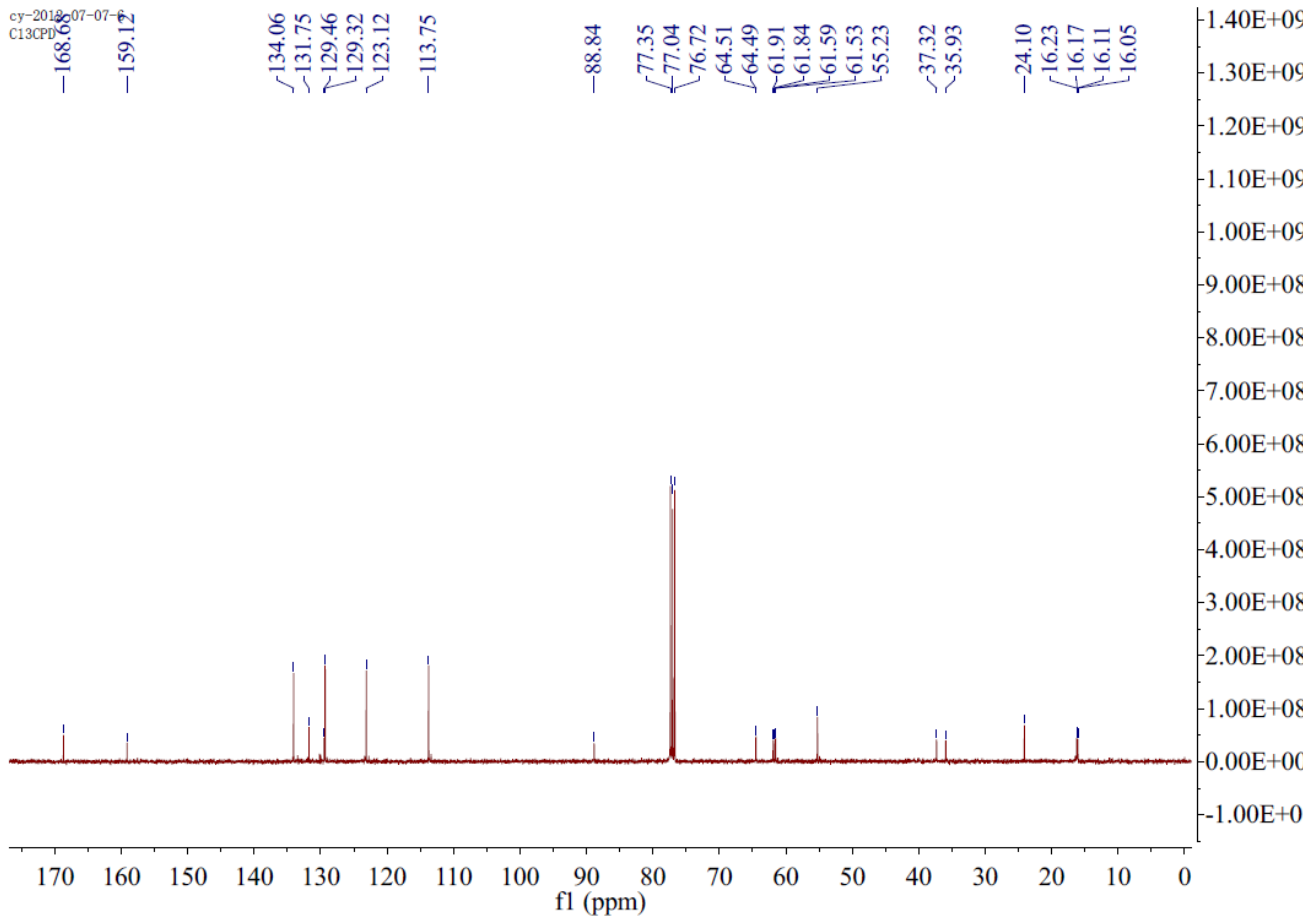

**Diethyl (2-(1,3-dioxoisindolin-2-yl)-2-methoxypropyl)phosphonate (8h):**

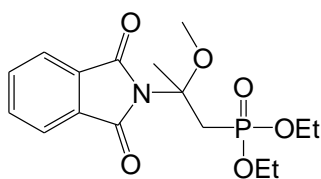

Colourless oil;  $^1\text{H}$  NMR (400 MHz,  $\text{CDCl}_3$ ):  $\delta$  7.83-7.86 (m, 2H, Ph), 7.70-

7.74 (m, 2H, Ph), 3.94-4.07 (m, 4H,  $2\text{OCH}_2$ ), 3.50 (dd,  $J = 19.6, 15.5$  Hz,

1H,  $\text{CH}_2\text{-P}$ ), 3.26 (s, 3H,  $\text{OCH}_3$ ), 2.38 (dd,  $J = 19.6, 15.5$  Hz, 1H,  $\text{CH}_2\text{-P}$ ),

2.14 (s, 3H,  $\text{CH}_3$ ), 1.19 (t,  $J = 7.1$  Hz, 3H,  $\text{CH}_3$ ), 1.11 (t,  $J = 7.1$  Hz, 3H,  $\text{CH}_3$ );  $^{13}\text{C}$  NMR (101 MHz,

$\text{CDCl}_3$ ):  $\delta$  168.72 ( $\text{C=O}$ ), 134.14, 131.72, 123.18 (Ph), 89.08 ( $\text{O-C-N}$ ), 61.88 (d,  $J = 6.6$  Hz,  $\text{OCH}_2$ ),

61.60 (d,  $J = 6.6$  Hz,  $\text{OCH}_2$ ), 49.78 (d,  $J = 2.8$  Hz,  $\text{OCH}_3$ ), 36.31 (d,  $J = 140.7$  Hz,  $\text{C-P}$ ), 23.19 ( $\text{CH}_3$ ),

16.20 (d,  $J = 6.4$  Hz,  $\text{CH}_3$ ), 16.09 (d,  $J = 6.4$  Hz,  $\text{CH}_3$ );  $^{31}\text{P}$  NMR (162 MHz,  $\text{CDCl}_3$ ):  $\delta$  24.36 (s); ESI-

HRMS calcd for  $[\text{C}_{16}\text{H}_{22}\text{NO}_6\text{P}, \text{M}+\text{Na}]^+$ : 378.1077; Found: 378.1073.

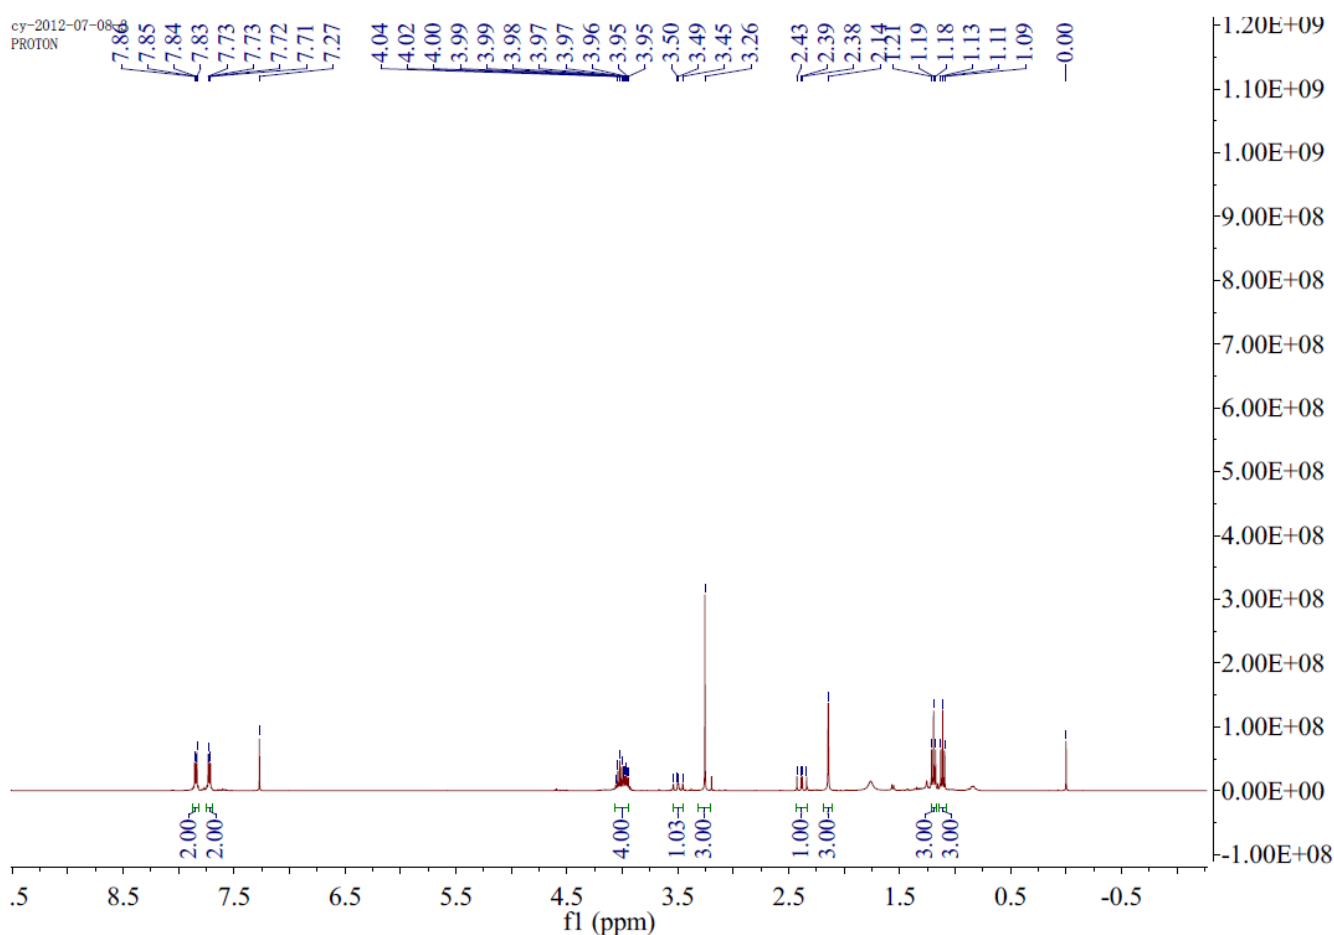



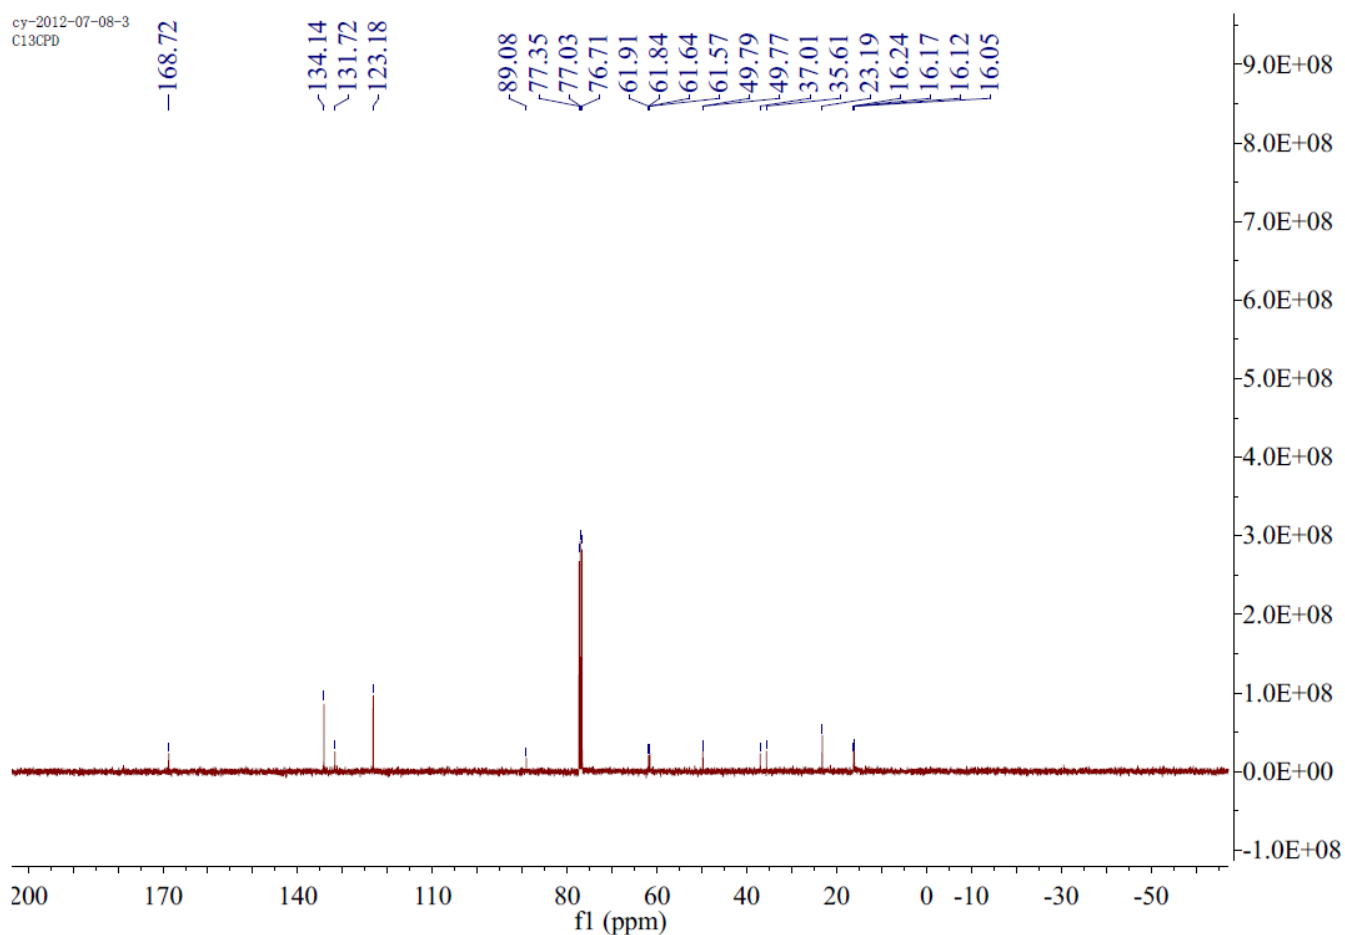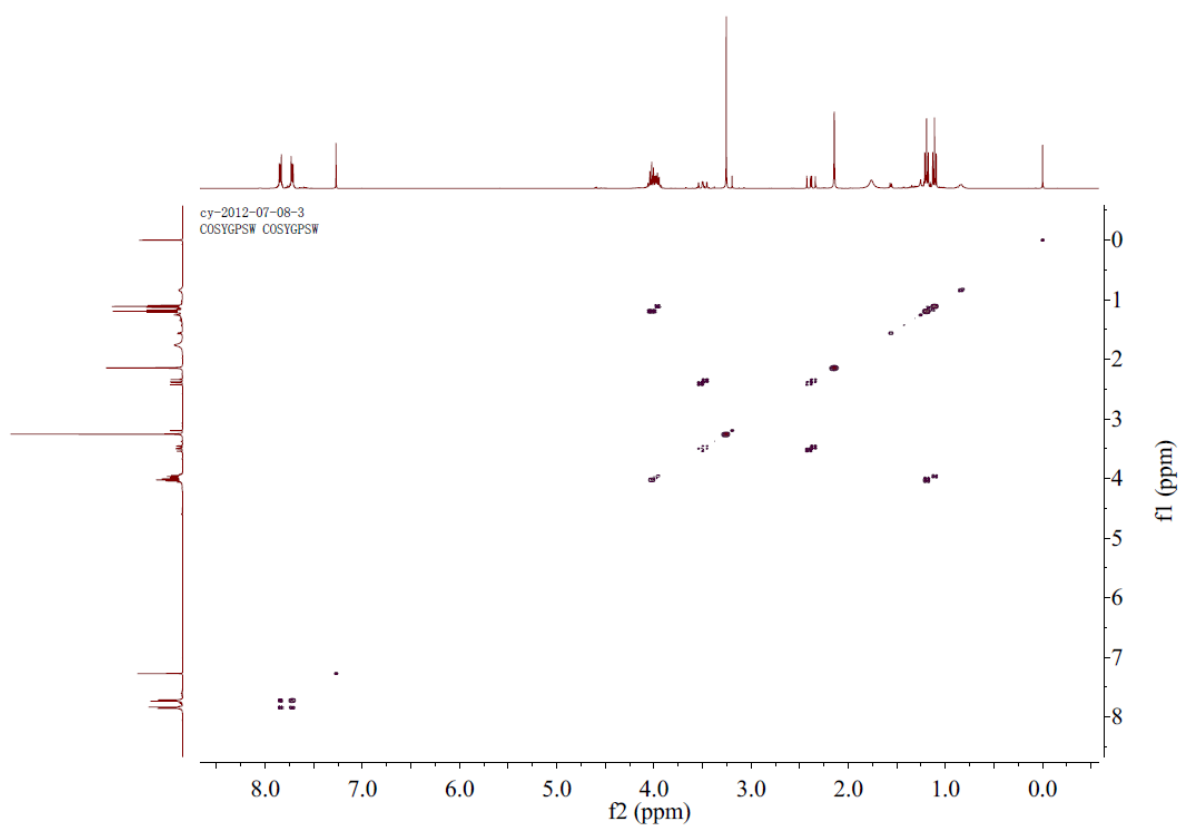

$^1\text{H}$ - $^1\text{H}$  COSY spectrum of **8h**

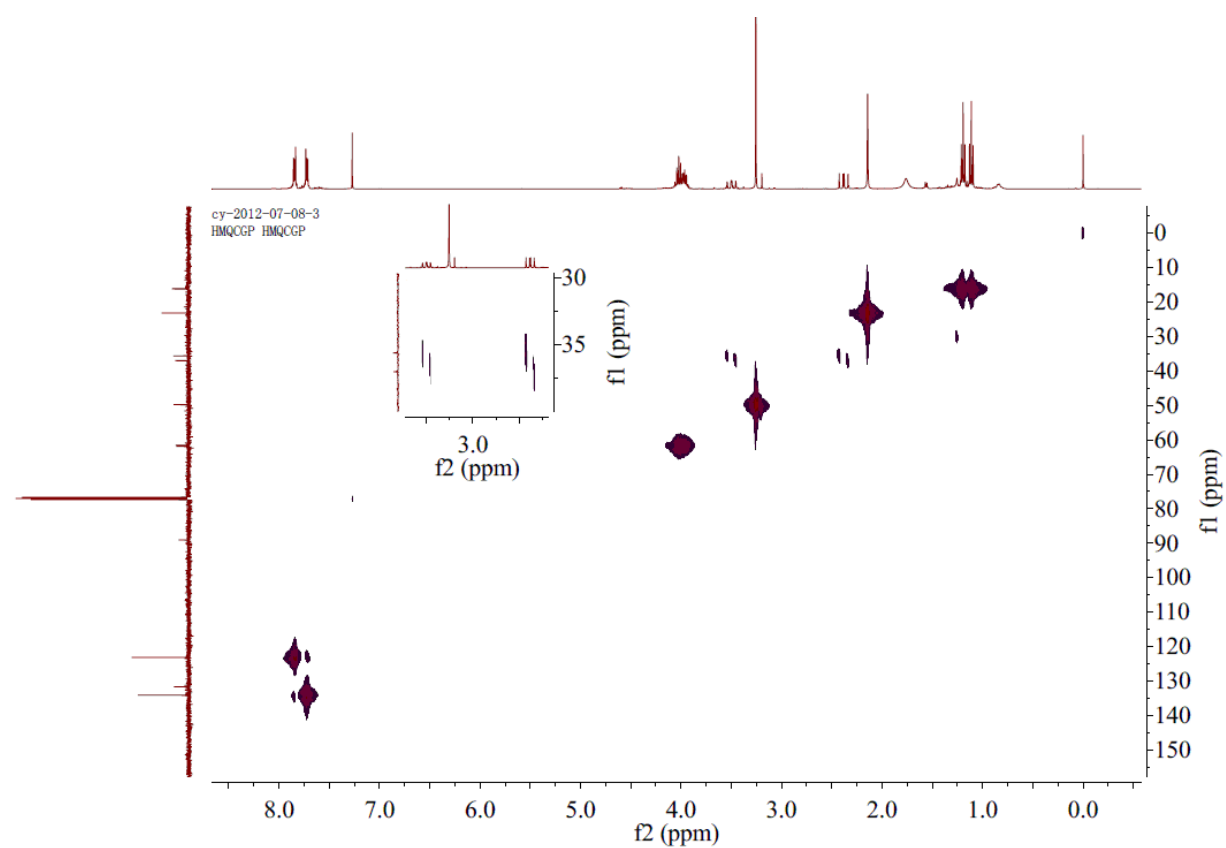

HMQC spectrum of **8h**

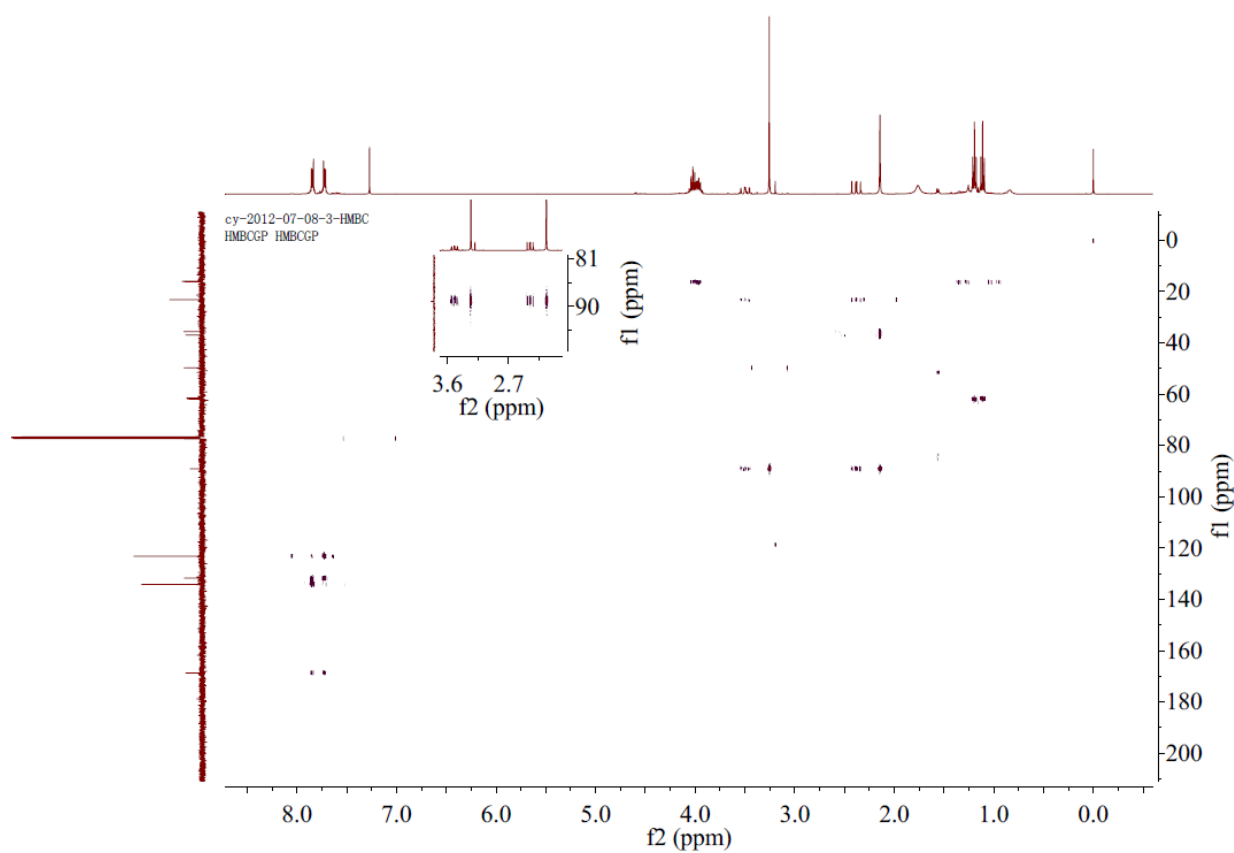

HMBC spectrum of **8h**

**Diethyl (2-(1,3-dioxoisindolin-2-yl)-2-ethoxypropyl)phosphonate (8i):**

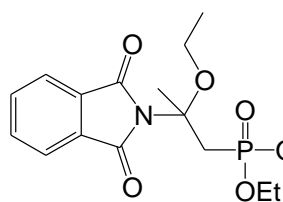

Colourless oil;  $^1\text{H}$  NMR (400 MHz,  $\text{CDCl}_3$ ):  $\delta$  7.82-7.85 (m, 2H, Ph), 7.70-7.73 (m, 2H, Ph), 3.90-4.09 (m, 4H,  $2\text{OCH}_2$ ), 3.61 (dq,  $J = 14.1, 7.0$  Hz, 1H,  $\text{OCH}_2$ ), 3.50 (dd,  $J = 19.0, 15.6$  Hz, 1H,  $\text{CH}_2\text{-P}$ ), 3.35 (dq,  $J = 14.1, 7.0$  Hz, 1H,  $\text{OCH}_2$ ), 2.40 (dd,  $J = 19.0, 15.6$  Hz, 1H,  $\text{CH}_2\text{-P}$ ), 2.15 (s, 3H,  $\text{CH}_3$ ), 1.19 (dt,  $J = 10.1, 7.0$  Hz, 6H,  $2\text{CH}_3$ ), 1.10 (t,  $J = 7.1$  Hz, 3H,  $\text{CH}_3$ );  $^{13}\text{C}$  NMR (101 MHz,  $\text{CDCl}_3$ ):  $\delta$  168.71 ( $\text{C=O}$ ), 134.08, 131.76, 123.14 (Ph), 88.77 ( $\text{O-C-N}$ ), 61.84 (d,  $J = 6.4$  Hz,  $\text{OCH}_2$ ), 61.56 (d,  $J = 6.4$  Hz,  $\text{OCH}_2$ ), 57.85 (d,  $J = 2.5$  Hz,  $\text{OCH}_2$ ), 36.54 (d,  $J = 139.9$  Hz,  $\text{C-P}$ ), 23.96 ( $\text{CH}_3$ ), 16.23 (d,  $J = 6.4$  Hz,  $\text{CH}_3$ ), 16.10 (d,  $J = 6.4$  Hz,  $\text{CH}_3$ ), 15.22 ( $\text{CH}_3$ );  $^{31}\text{P}$  NMR (162 MHz,  $\text{CDCl}_3$ ):  $\delta$  24.48 (s); ESI-HRMS calcd for  $[\text{C}_{17}\text{H}_{24}\text{NO}_6\text{P}, \text{M}+\text{Na}]^+$ : 392.1233; Found: 392.1231.

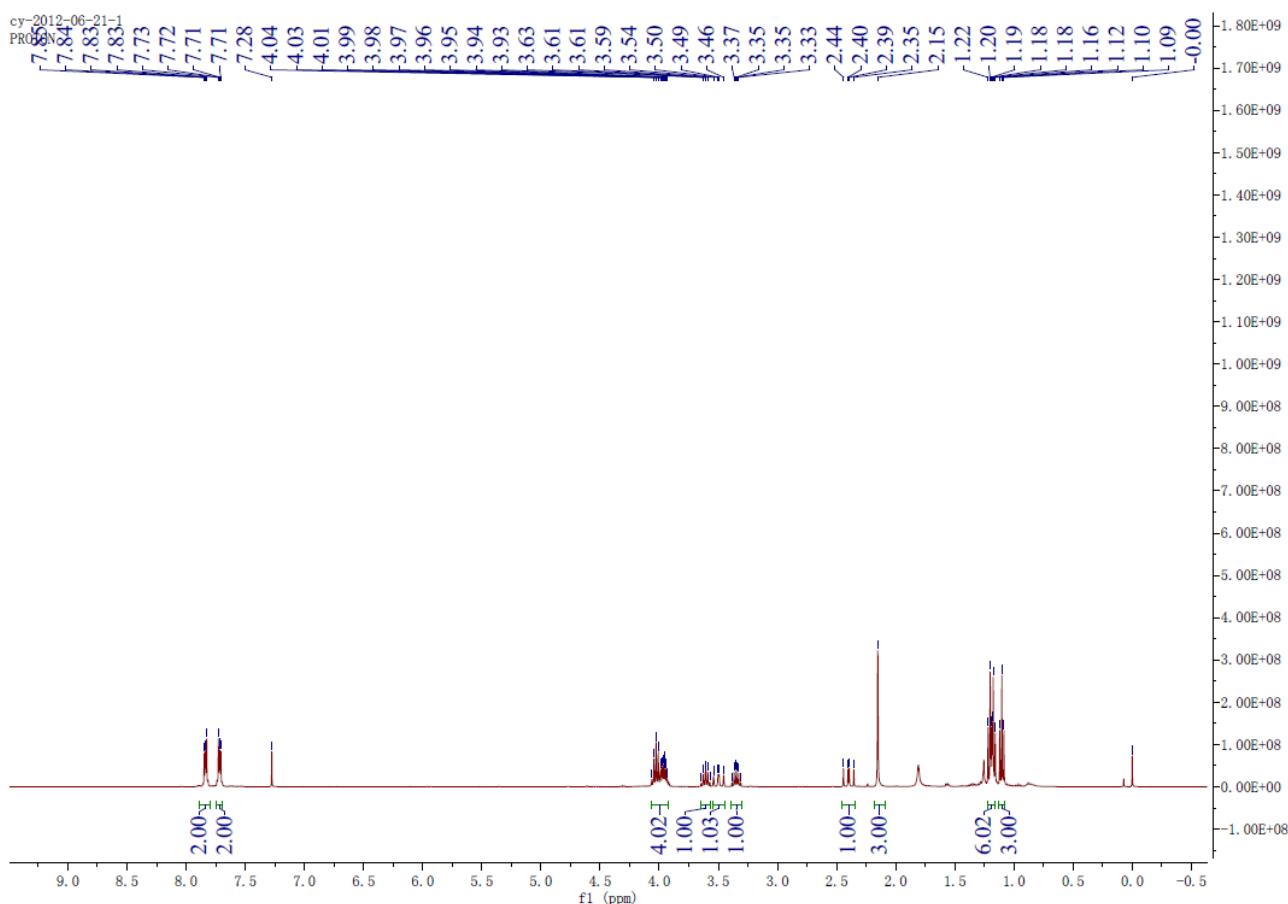

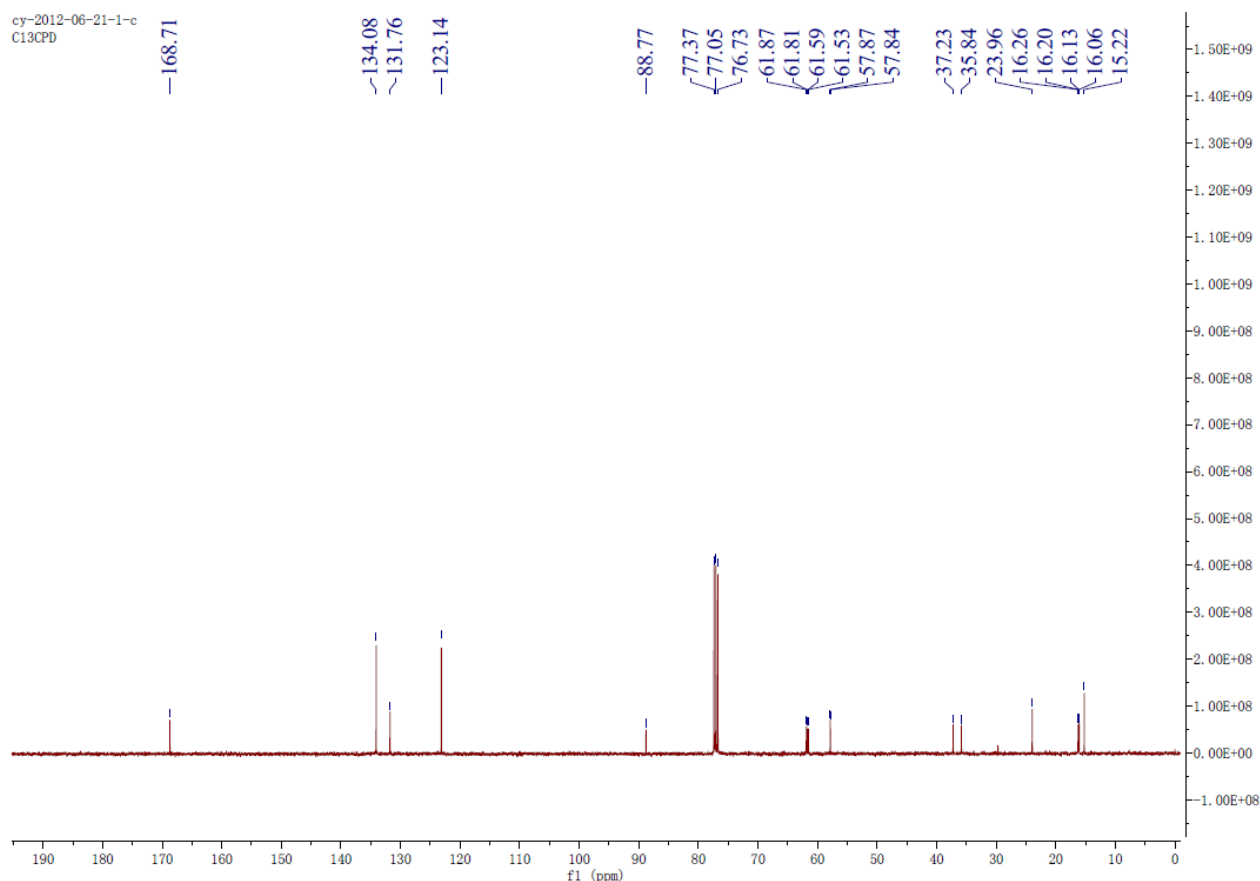

**Diethyl (2-(2-chloroethoxy)-2-(1,3-dioxoisindolin-2-yl)propyl)phosphonate (8j):**

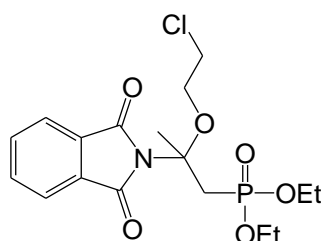

Colourless oil;  $^1\text{H}$  NMR (400 MHz,  $\text{CDCl}_3$ ):  $\delta$  7.83-7.86 (m, 2H, Ph), 7.72-7.75 (m, 2H, Ph), 3.93-4.05 (m, 4H,  $2\text{OCH}_2$ ), 3.76-3.83 (m, 1H,  $\text{OCH}_2$ ), 3.57-3.63 (m, 3H,  $\text{OCH}_2\text{CH}_2\text{Cl}$ ), 3.54 (dd,  $J = 13.8, 10.9$  Hz, 1H,  $\text{CH}_2\text{-P}$ ), 2.40 (dd,  $J = 19.6, 15.5$  Hz, 1H,  $\text{CH}_2\text{-P}$ ), 2.17 (s, 3H,  $\text{CH}_3$ ), 1.20 (t,  $J = 7.1$  Hz, 3H,  $\text{CH}_3$ ), 1.11 (t,  $J = 7.1$  Hz, 3H,  $\text{CH}_3$ );  $^{13}\text{C}$  NMR (101 MHz,  $\text{CDCl}_3$ ):  $\delta$  168.57 (C=O), 134.22, 131.66, 123.24 (Ph), 88.93 (O-C-N), 63.01 (d,  $J = 2.7$  Hz,  $\text{OCH}_2$ ), 61.87 (d,  $J = 6.3$  Hz,  $\text{OCH}_2$ ), 61.66 (d,  $J = 6.3$  Hz,  $\text{OCH}_2$ ), 42.38 ( $\text{CH}_2\text{Cl}$ ), 36.25 (d,  $J = 140.4$  Hz, C-P), 24.01 ( $\text{CH}_3$ ), 16.22 (d,  $J = 6.5$  Hz,  $\text{CH}_3$ ), 16.09 (d,  $J = 6.5$  Hz,  $\text{CH}_3$ );  $^{31}\text{P}$  NMR (162 MHz,  $\text{CDCl}_3$ ):  $\delta$  24.03 (s); ESI-HRMS calcd for  $[\text{C}_{17}\text{H}_{23}\text{ClNO}_6\text{P}, \text{M}+\text{Na}]^+$ : 426.0844; Found: 426.0839.

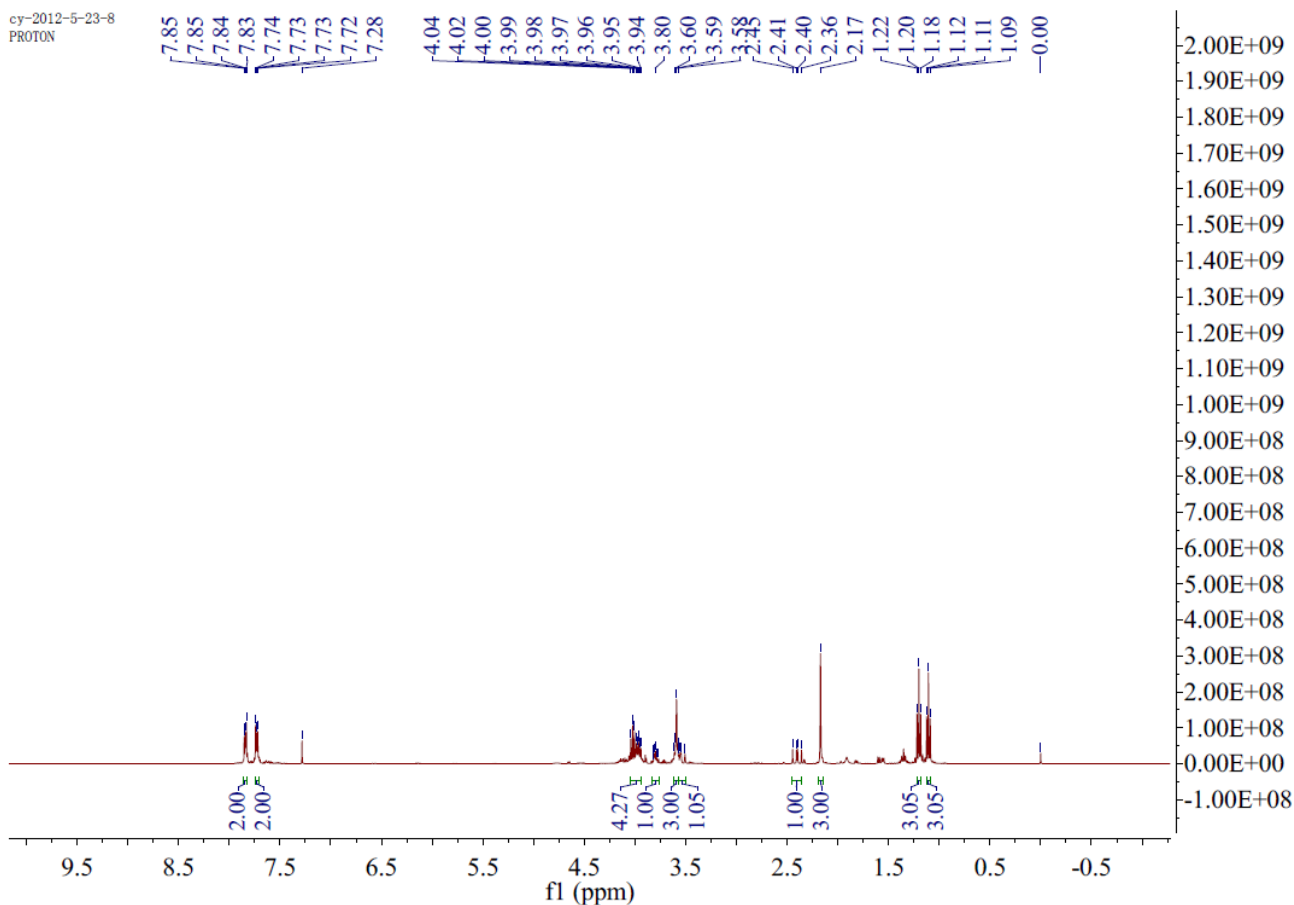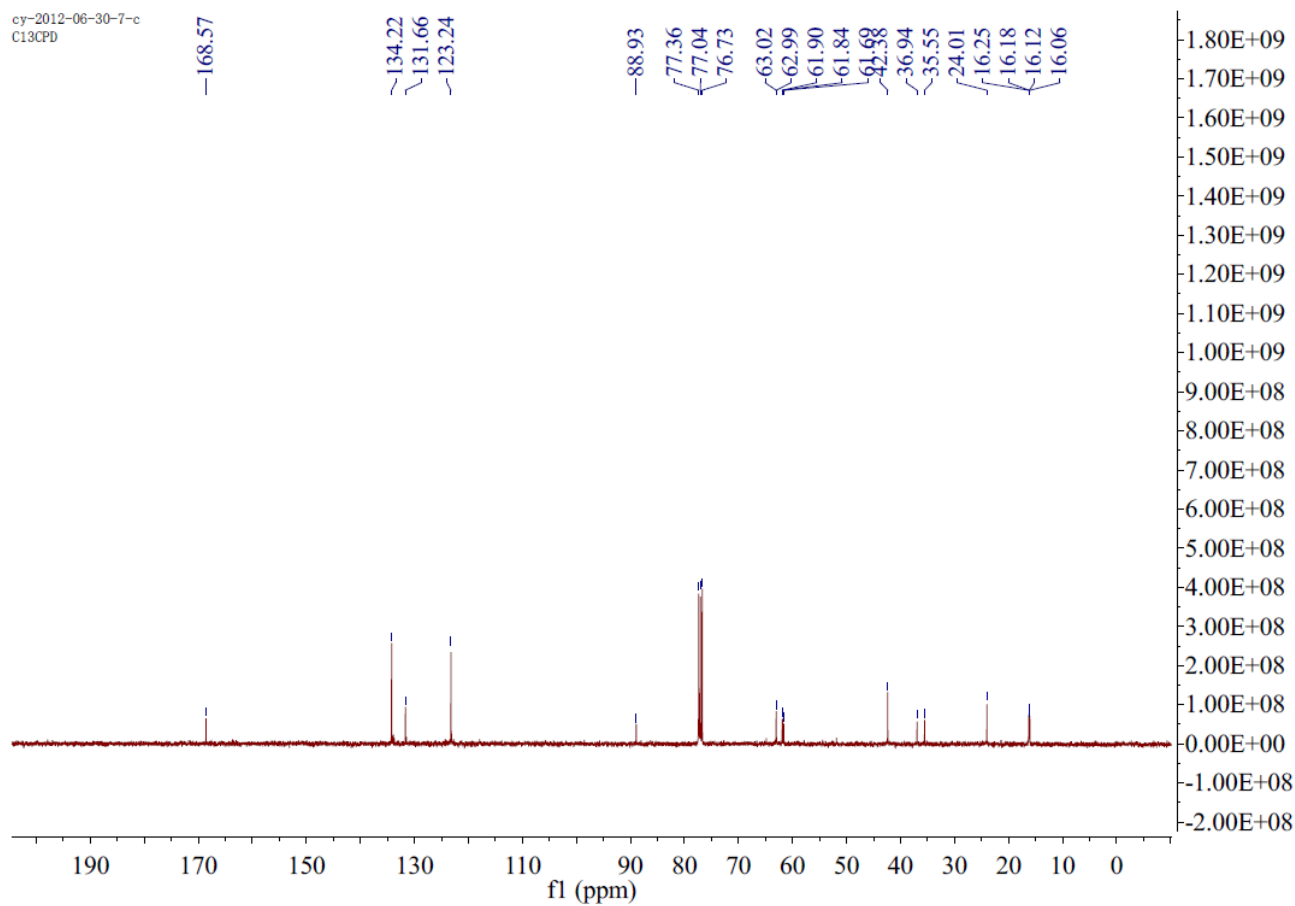

**Diethyl (2-(1,3-dioxoisindolin-2-yl)-2-(2,2,2-trifluoroethoxy)propyl)phosphonate (8k):**

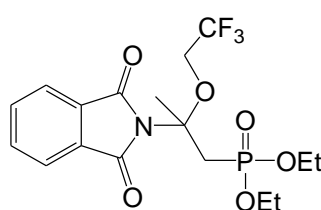

Colourless oil;  $^1\text{H}$  NMR (400 MHz,  $\text{CDCl}_3$ ):  $\delta$  7.84-7.90 (m, 2H, Ph), 7.73-7.80 (m, 2H, Ph), 3.90-4.13 (m, 5H,  $2\text{OCH}_2$ ,  $\text{OCH}_2\text{CF}_3$ ), 3.75-3.84 (m, 1H,  $\text{OCH}_2\text{CF}_3$ ), 3.61-3.72 (m, 1H,  $\text{CH}_2\text{-P}$ ), 2.37-2.50 (m, 1H,  $\text{CH}_2\text{-P}$ ), 2.21 (s, 1H,  $\text{CH}_3$ ), 1.23 (t,  $J = 7.1$  Hz, 3H,  $\text{CH}_3$ ), 1.12 (t,  $J = 7.1$  Hz, 3H,  $\text{CH}_3$ );  $^{13}\text{C}$

NMR (101 MHz,  $\text{CDCl}_3$ ):  $\delta$  168.31 (C=O), 134.41, 131.50, 123.41 (Ph), 89.22 (N-C-O), 61.96 (d,  $J = 6.5$  Hz,  $\text{OCH}_2$ ), 61.79 (d,  $J = 6.5$  Hz,  $\text{OCH}_2$ ), 61.03 (d,  $J = 3.2$  Hz,  $\text{OCH}_2$ ), 60.67 (d,  $J = 2.9$  Hz,  $\text{CF}_3$ ), 35.93 (d,  $J = 140.8$  Hz, C-P), 23.84 ( $\text{CH}_3$ ), 16.21 (d,  $J = 6.3$  Hz,  $\text{CH}_3$ ), 16.07 (d,  $J = 6.3$  Hz,  $\text{CH}_3$ );  $^{31}\text{P}$  NMR (162 MHz,  $\text{CDCl}_3$ ):  $\delta$  23.38 (s); ESI-HRMS calcd for  $[\text{C}_{17}\text{H}_{21}\text{F}_3\text{NO}_6\text{P}, \text{M}+\text{Na}]^+$ : 446.0951; Found: 446.0954.

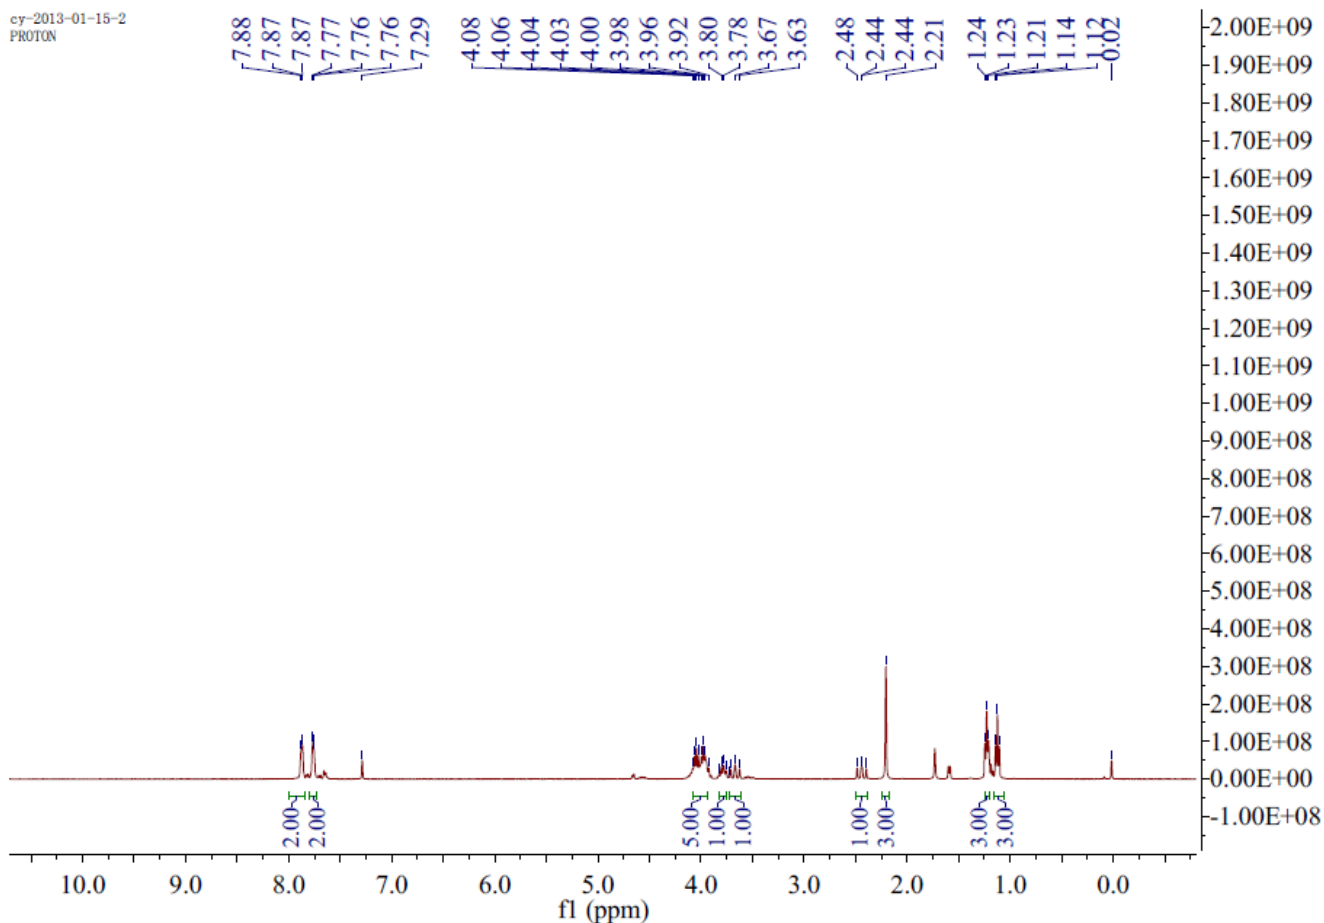

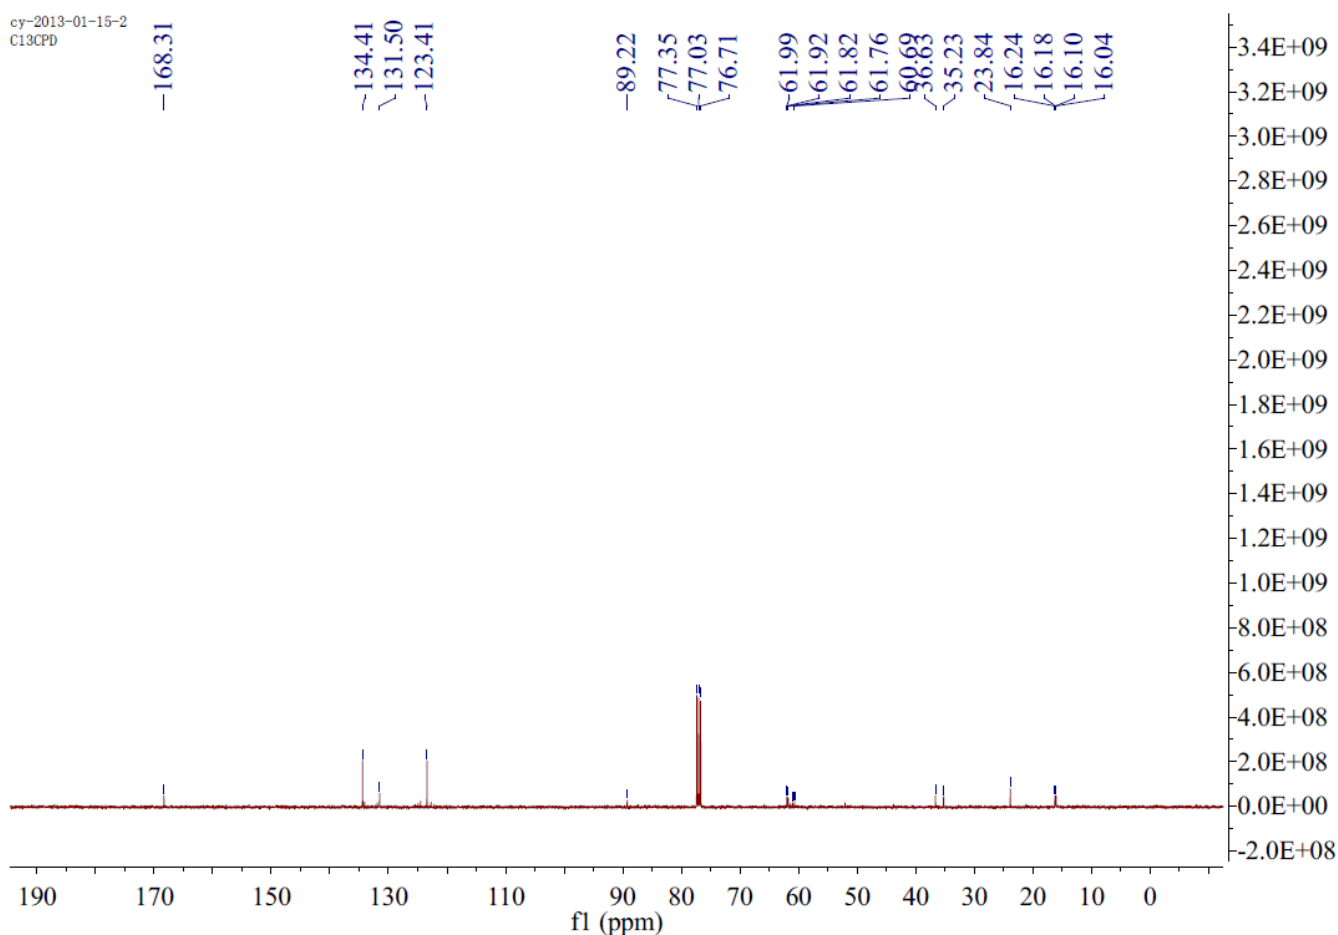

**Diethyl (2-butoxy-2-(1,3-dioxoisindolin-2-yl)propyl)phosphonate (8l):**

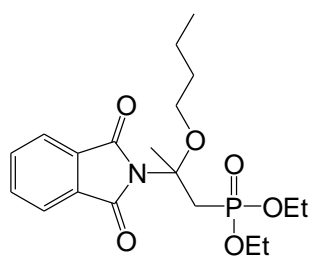

Colourless oil;  $^1\text{H}$  NMR (400 MHz,  $\text{CDCl}_3$ ):  $\delta$  7.82-7.86 (m, 2H, Ph), 7.70-7.74 (m, 2H, Ph), 3.93-4.07 (m, 4H,  $2\text{OCH}_2$ ), 3.49-3.59 (m, 2H,  $\text{OCH}_2$ ,  $\text{CH}_2$ -P), 3.25 (dt,  $J = 8.6, 6.6$  Hz, 1H,  $\text{OCH}_2$ ), 2.38 (dd,  $J = 19.6, 15.5$  Hz, 1H,  $\text{CH}_2$ -P), 2.15 (s, 3H,  $\text{CH}_3$ ), 1.48-1.55 (m, 2H,  $\text{CH}_2$ ), 1.28-1.34 (m, 2H,  $\text{CH}_2$ ),

1.20 (t,  $J = 7.1$  Hz, 3H,  $\text{CH}_3$ ), 1.10 (t,  $J = 7.1$  Hz, 3H,  $\text{CH}_3$ ), 0.85 (t,  $J = 7.4$  Hz, 3H,  $\text{CH}_3$ );  $^{13}\text{C}$  NMR (101 MHz,  $\text{CDCl}_3$ ):  $\delta$  168.68 (C=O), 134.05, 131.71, 123.09 (Ph), 88.62 (O-C-N), 61.99 ( $\text{OCH}_2$ ), 61.78 (d,  $J = 6.5$  Hz,  $\text{OCH}_2$ ), 61.50 (d,  $J = 6.5$  Hz,  $\text{OCH}_2$ ), 36.44 (d,  $J = 140.0$  Hz, C-P), 31.65 ( $\text{CH}_2$ ), 23.87 ( $\text{CH}_3$ ), 19.24 ( $\text{CH}_2$ ), 16.18 (d,  $J = 6.4$  Hz,  $\text{CH}_3$ ), 16.05 (d,  $J = 6.4$  Hz,  $\text{CH}_3$ ), 13.78 ( $\text{CH}_3$ );  $^{31}\text{P}$  NMR (162 MHz,  $\text{CDCl}_3$ ):  $\delta$  24.56 (s); ESI-HRMS calcd for  $[\text{C}_{19}\text{H}_{28}\text{NO}_6\text{P}, \text{M}+\text{Na}]^+$ : 420.1546; Found: 420.1543.

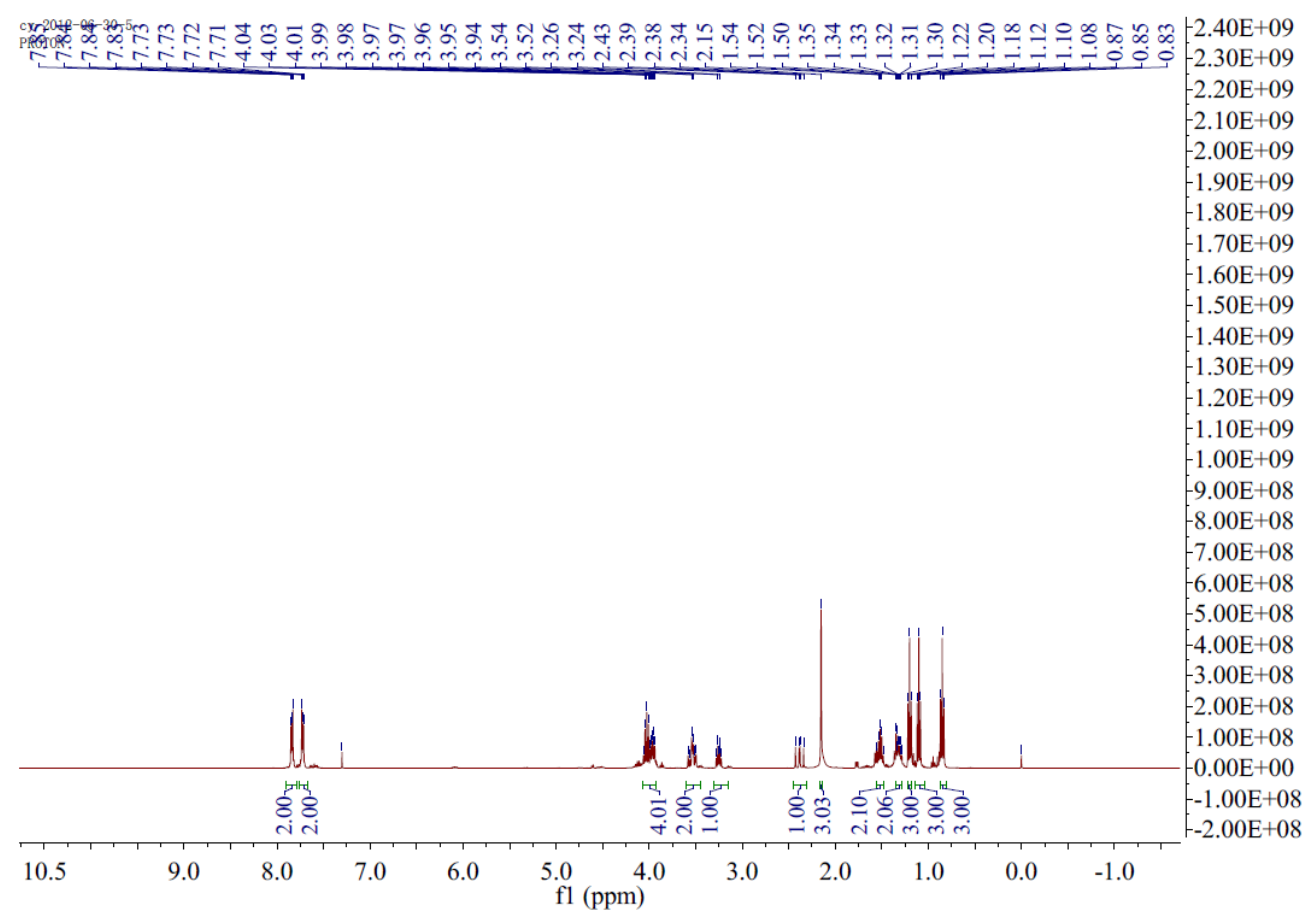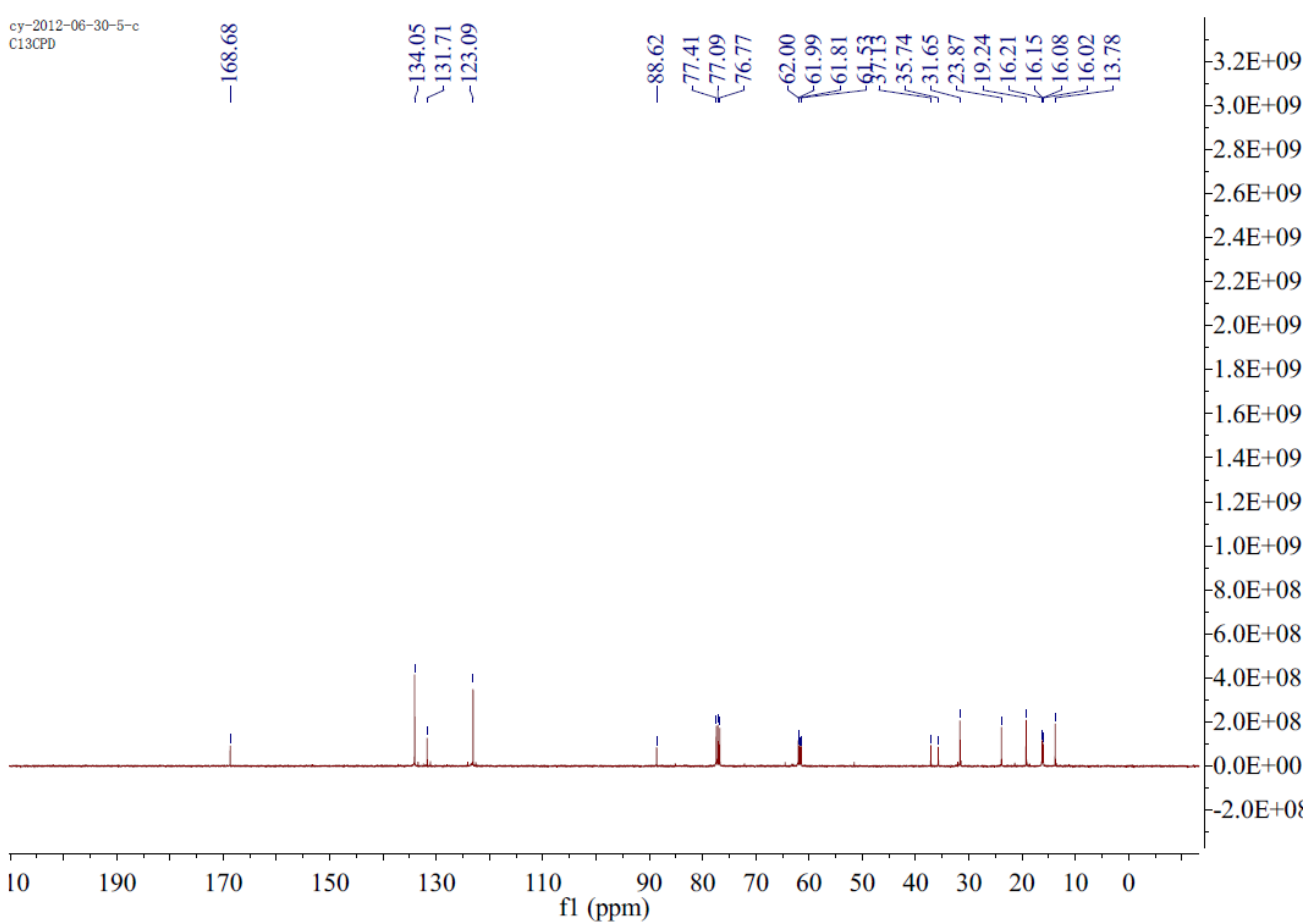



**Diethyl (2-(1,3-dioxoisindolin-2-yl)-2-isobutoxypropyl)phosphonate (8m):**

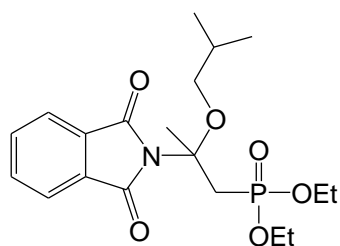

Colourless oil;  $^1\text{H}$  NMR (400 MHz,  $\text{CDCl}_3$ ):  $\delta$  7.82-7.85 (m, 2H, Ph), 7.70-7.74 (m, 2H, Ph), 3.92-4.07 (m, 4H,  $2\text{OCH}_2$ ), 3.59 (dd,  $J = 18.9, 15.7$  Hz, 1H,  $\text{CH}_2\text{-P}$ ), 3.30 (dd,  $J = 8.4, 6.7$  Hz, 1H,  $\text{OCH}_2$ ), 2.99 (dd,  $J = 8.4, 6.7$  Hz, 1H,  $\text{OCH}_2$ ), 2.38 (dd,  $J = 18.9, 15.7$  Hz, 1H,  $\text{CH}_2\text{-P}$ ), 2.15 (s, 3H,  $\text{CH}_3$ ), 1.73-1.84 (m, 1H, CH), 1.20 (t,  $J = 7.1$  Hz, 3H,  $\text{CH}_3$ ), 1.10 (t,  $J = 7.1$  Hz, 3H,  $\text{CH}_3$ ), 0.86 (dd,  $J = 12.6, 6.7$  Hz, 6H,  $2\text{CH}_3$ );  $^{13}\text{C}$  NMR (101 MHz,  $\text{CDCl}_3$ ):  $\delta$  168.72 (C=O), 134.06, 131.72, 123.11 (Ph), 88.52 (O-C-N), 68.92 (d,  $J = 2.3$  Hz,  $\text{OCH}_2$ ), 61.77 (d,  $J = 6.4$  Hz,  $\text{OCH}_2$ ), 61.50 (d,  $J = 6.4$  Hz,  $\text{OCH}_2$ ), 36.39 (d,  $J = 139.7$  Hz, C-P), 28.36 (CH), 23.90 ( $\text{CH}_3$ ), 19.47 ( $\text{CH}_3$ ), 19.44 ( $\text{CH}_3$ ), 16.20 (d,  $J = 6.5$  Hz,  $\text{CH}_3$ ), 16.07 (d,  $J = 6.5$  Hz,  $\text{CH}_3$ );  $^{31}\text{P}$  NMR (162 MHz,  $\text{CDCl}_3$ ):  $\delta$  24.64 (s); ESI-HRMS calcd for  $[\text{C}_{19}\text{H}_{28}\text{NO}_6\text{P}, \text{M}+\text{Na}]^+$ : 420.1552; Found: 420.1554.

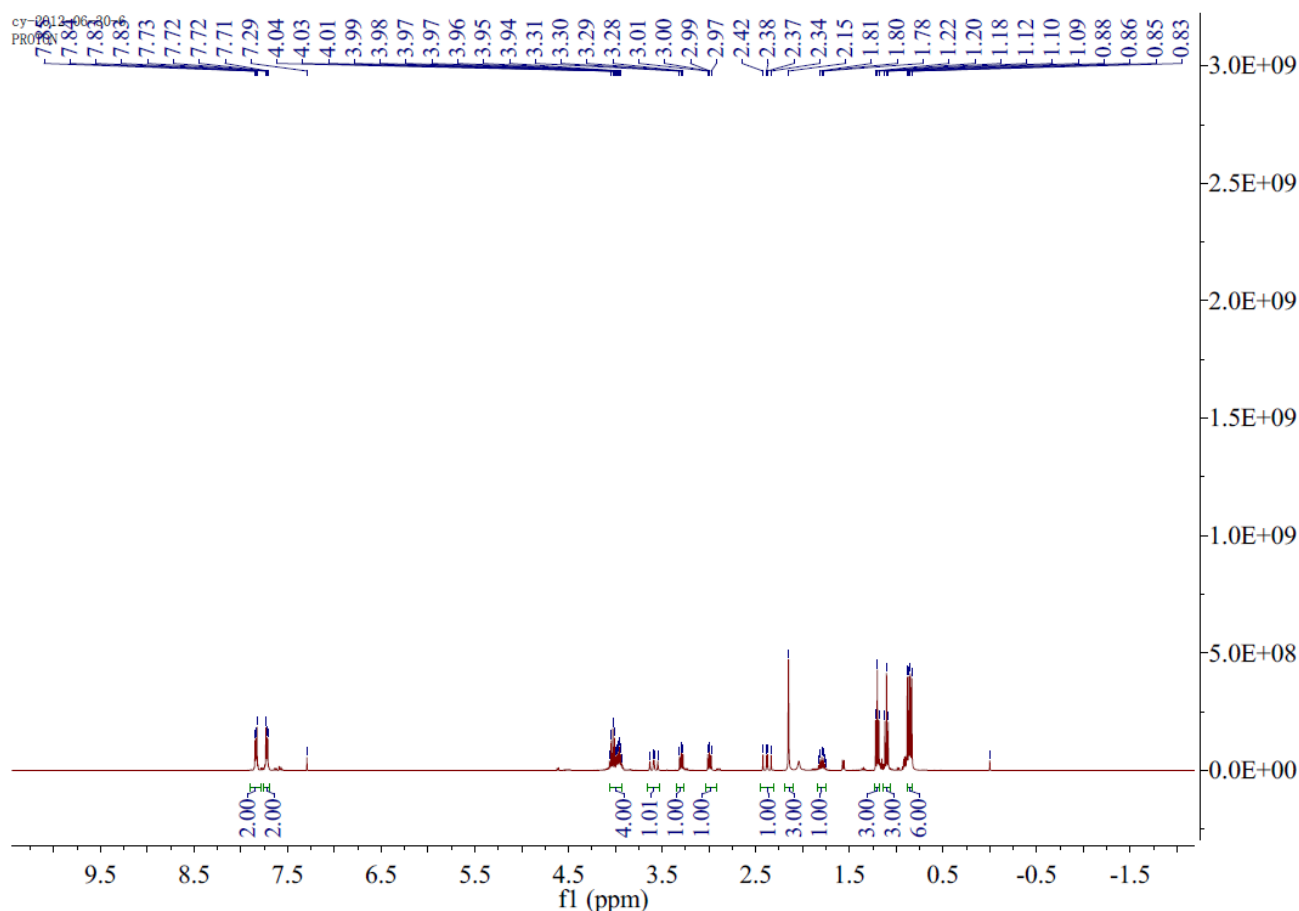

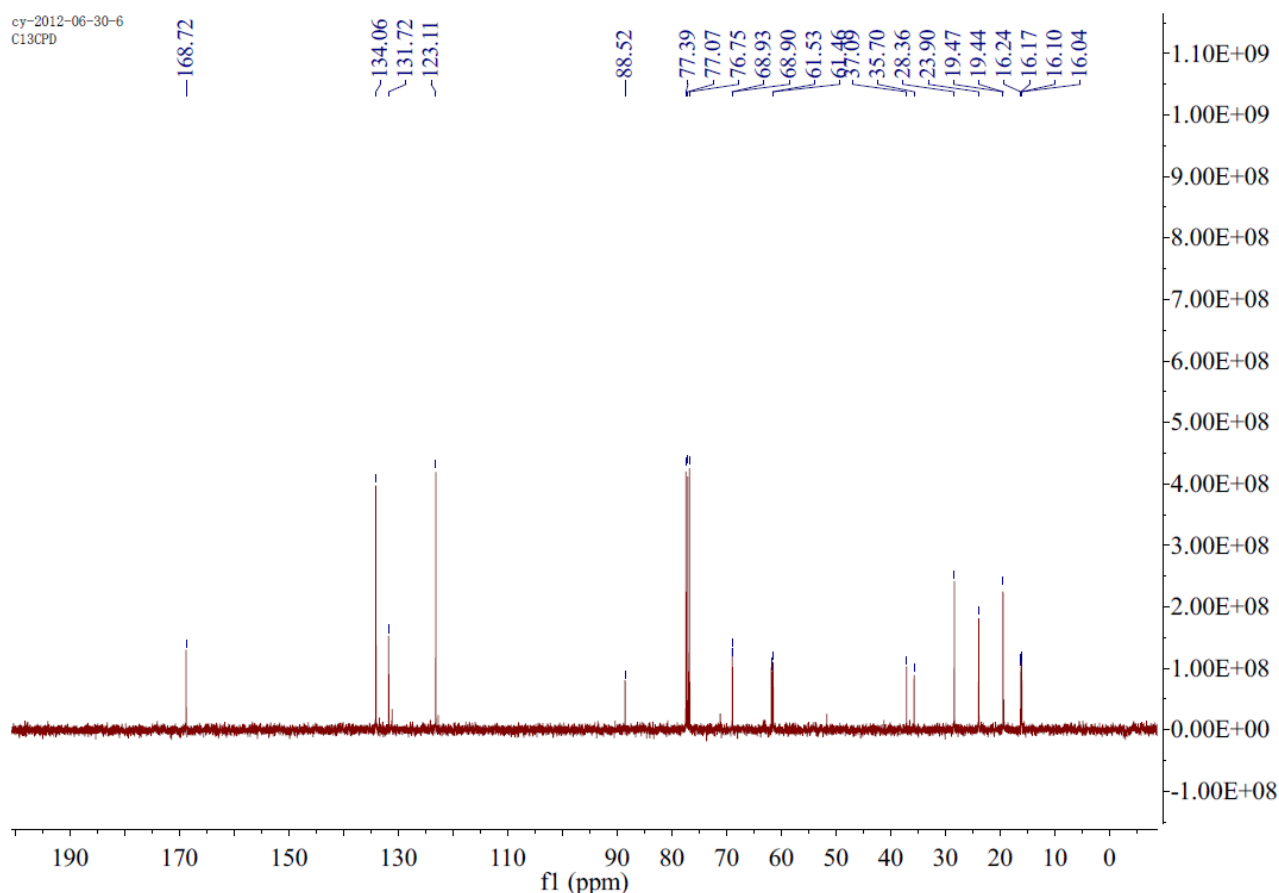

**Diethyl (2-(1,3-dioxoisindolin-2-yl)-2-(hexyloxy)propyl)phosphonate (8n):**

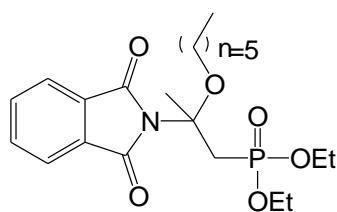

Colourless oil;  $^1\text{H}$  NMR (400 MHz,  $\text{CDCl}_3$ ):  $\delta$  7.83-7.88 (m, 2H, Ph), 7.71-7.75 (m, 2H, Ph), 3.94-4.07 (m, 4H,  $2\text{OCH}_2$ ), 3.50-3.62 (m, 2H,  $\text{OCH}_2$ ,  $\text{CH}_2\text{-P}$ ), 3.23-3.30 (m, 1H,  $\text{OCH}_2$ ), 2.39 (dd,  $J = 19.6, 15.4$  Hz, 1H,  $\text{CH}_2\text{-P}$ ), 2.17 (s, 3H,  $\text{CH}_3$ ), 1.50-1.60 (m, 2H,  $\text{CH}_2$ ), 1.19-1.30 (m, 9H,  $3\text{CH}_2$ ,  $\text{CH}_3$ ), 1.12 (t,  $J = 7.1$  Hz, 3H,  $\text{CH}_3$ ), 0.84 (t,  $J = 6.9$  Hz, 3H,  $\text{CH}_3$ );  $^{13}\text{C}$  NMR (101 MHz,  $\text{CDCl}_3$ ):

$\delta$  168.71 (C=O), 134.05, 131.74, 123.10 (Ph), 88.65 (O-C-N), 62.32 (d,  $J = 2.2$  Hz,  $\text{OCH}_2$ ), 61.80 (d,  $J = 6.4$  Hz,  $\text{OCH}_2$ ), 61.53 (d,  $J = 6.4$  Hz,  $\text{OCH}_2$ ), 36.46 (d,  $J = 139.8$  Hz, C-P), 31.52 ( $\text{CH}_2$ ), 29.55 ( $\text{CH}_2$ ), 25.68 ( $\text{CH}_2$ ), 23.91 ( $\text{CH}_3$ ), 22.53 ( $\text{CH}_2$ ), 16.21 (d,  $J = 6.5$  Hz,  $\text{CH}_3$ ), 16.07 (d,  $J = 6.5$  Hz,  $\text{CH}_3$ ), 13.98 ( $\text{CH}_3$ );  $^{31}\text{P}$  NMR (162 MHz,  $\text{CDCl}_3$ ):  $\delta$  24.57 (s); ESI-HRMS calcd for  $[\text{C}_{21}\text{H}_{32}\text{NO}_6\text{P}, \text{M}+\text{Na}]^+$ : 448.1859; Found: 448.1851.

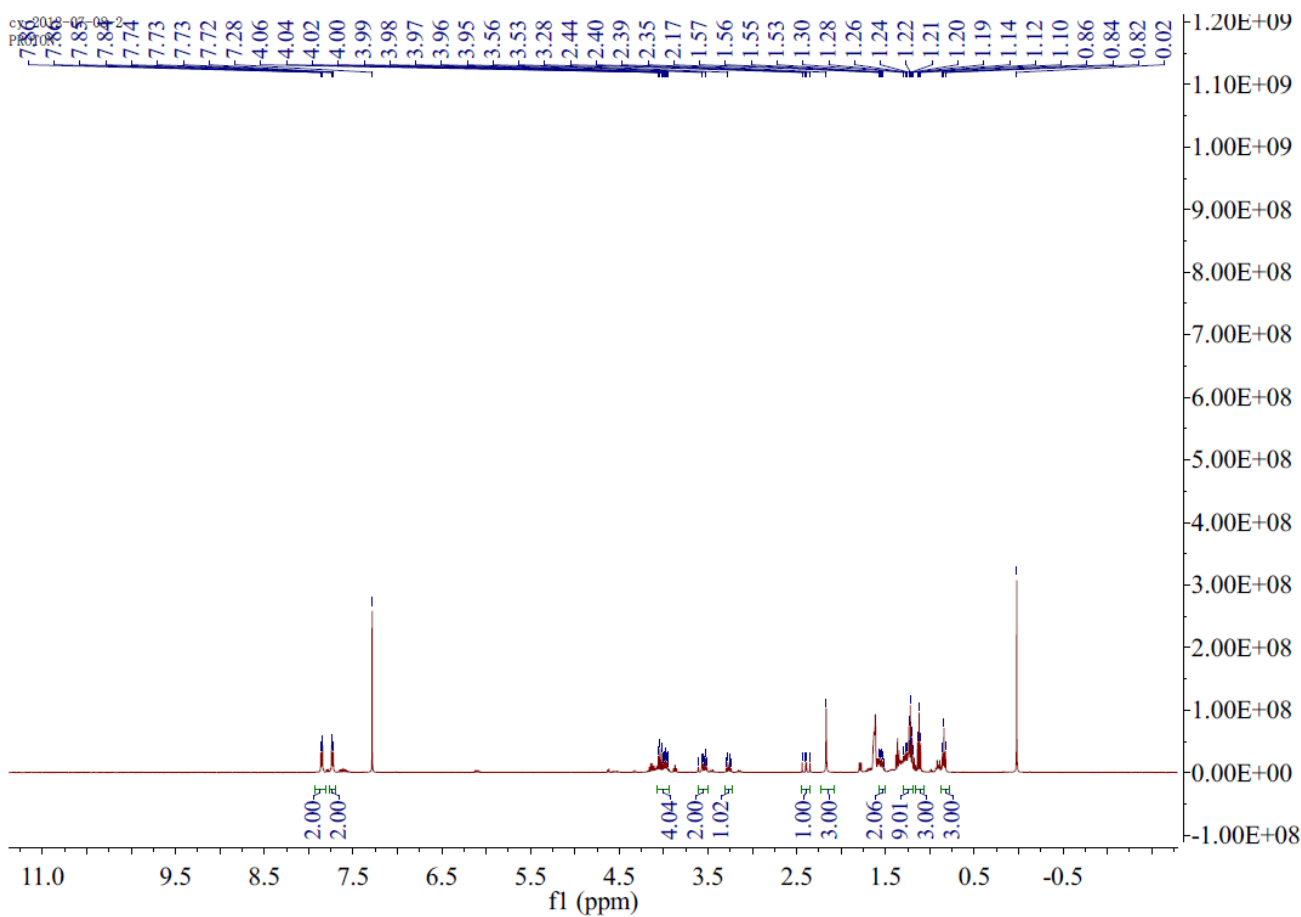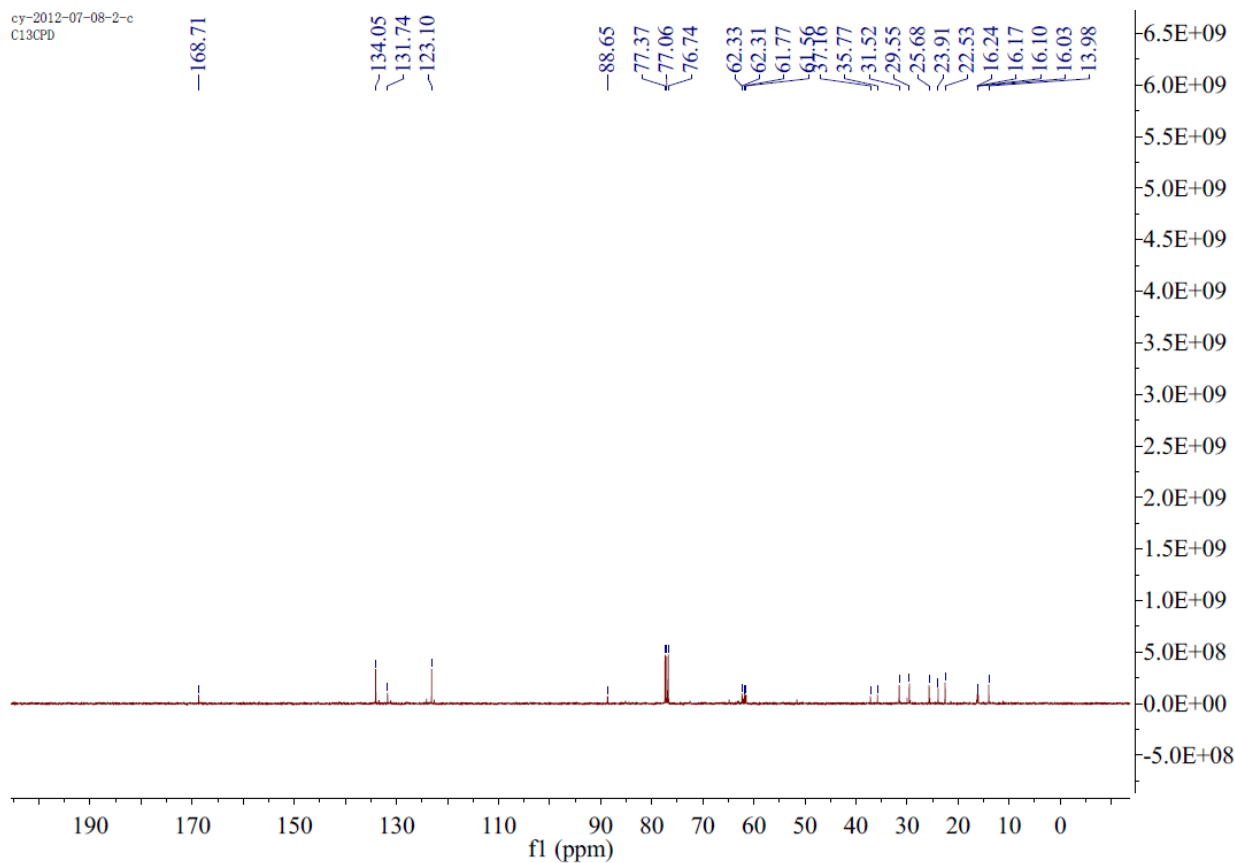

**Diethyl (2-(decyloxy)-2-(1,3-dioxoisindolin-2-yl)propyl)phosphonate (80):**

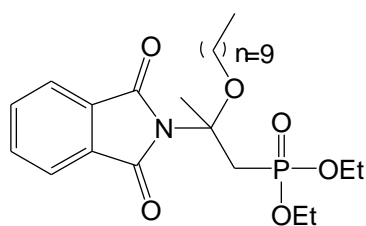

Colourless oil;  $^1\text{H}$  NMR (400 MHz,  $\text{CDCl}_3$ ):  $\delta$  7.81-7.85 (m, 2H, Ph), 7.69-7.73 (m, 2H, Ph), 3.92-4.06 (m, 4H,  $2\text{OCH}_2$ ), 3.48-3.60 (m, 2H,  $\text{OCH}_2$ ,  $\text{CH}_2\text{-P}$ ), 3.21-3.28 (m, 1H,  $\text{OCH}_2$ ), 2.37 (dd,  $J = 19.7, 15.5$  Hz, 1H,  $\text{CH}_2\text{-P}$ ), 2.15 (s, 3H,  $\text{CH}_3$ ), 1.48-1.58 (m, 2H,  $\text{CH}_2$ ), 1.15-1.31 (m,

17H,  $7\text{CH}_2$ ,  $\text{CH}_3$ ), 1.10 (t,  $J = 7.1$  Hz, 3H,  $\text{CH}_3$ ), 0.87 (t,  $J = 6.9$  Hz, 3H,  $\text{CH}_3$ );  $^{13}\text{C}$  NMR (101 MHz,  $\text{CDCl}_3$ ):  $\delta$  168.72 ( $\text{C=O}$ ), 134.03, 131.78, 123.12 (Ph), 88.68 ( $\text{O-C-N}$ ), 62.34 (d,  $J = 2.0$  Hz,  $\text{OCH}_2$ ), 61.80 (d,  $J = 6.5$  Hz,  $\text{OCH}_2$ ), 61.53 (d,  $J = 6.5$  Hz,  $\text{OCH}_2$ ), 36.50 (d,  $J = 140.0$  Hz,  $\text{C-P}$ ), 31.88 ( $\text{CH}_2$ ), 29.61 ( $\text{CH}_2$ ), 29.54 ( $\text{CH}_2$ ), 29.35 ( $\text{CH}_2$ ), 29.29 ( $\text{CH}_2$ ), 26.02 ( $\text{CH}_2$ ), 23.93 ( $\text{CH}_3$ ), 22.66 ( $\text{CH}_2$ ), 16.23 (d,  $J = 6.5$  Hz,  $\text{CH}_3$ ), 16.09 (d,  $J = 6.5$  Hz,  $\text{CH}_3$ ), 14.11 ( $\text{CH}_3$ );  $^{31}\text{P}$  NMR (162 MHz,  $\text{CDCl}_3$ ):  $\delta$  24.59 (s); ESI-HRMS calcd for  $[\text{C}_{25}\text{H}_{40}\text{NO}_6\text{P}, \text{M}+\text{Na}]^+$ : 504.2485; Found: 504.2487.

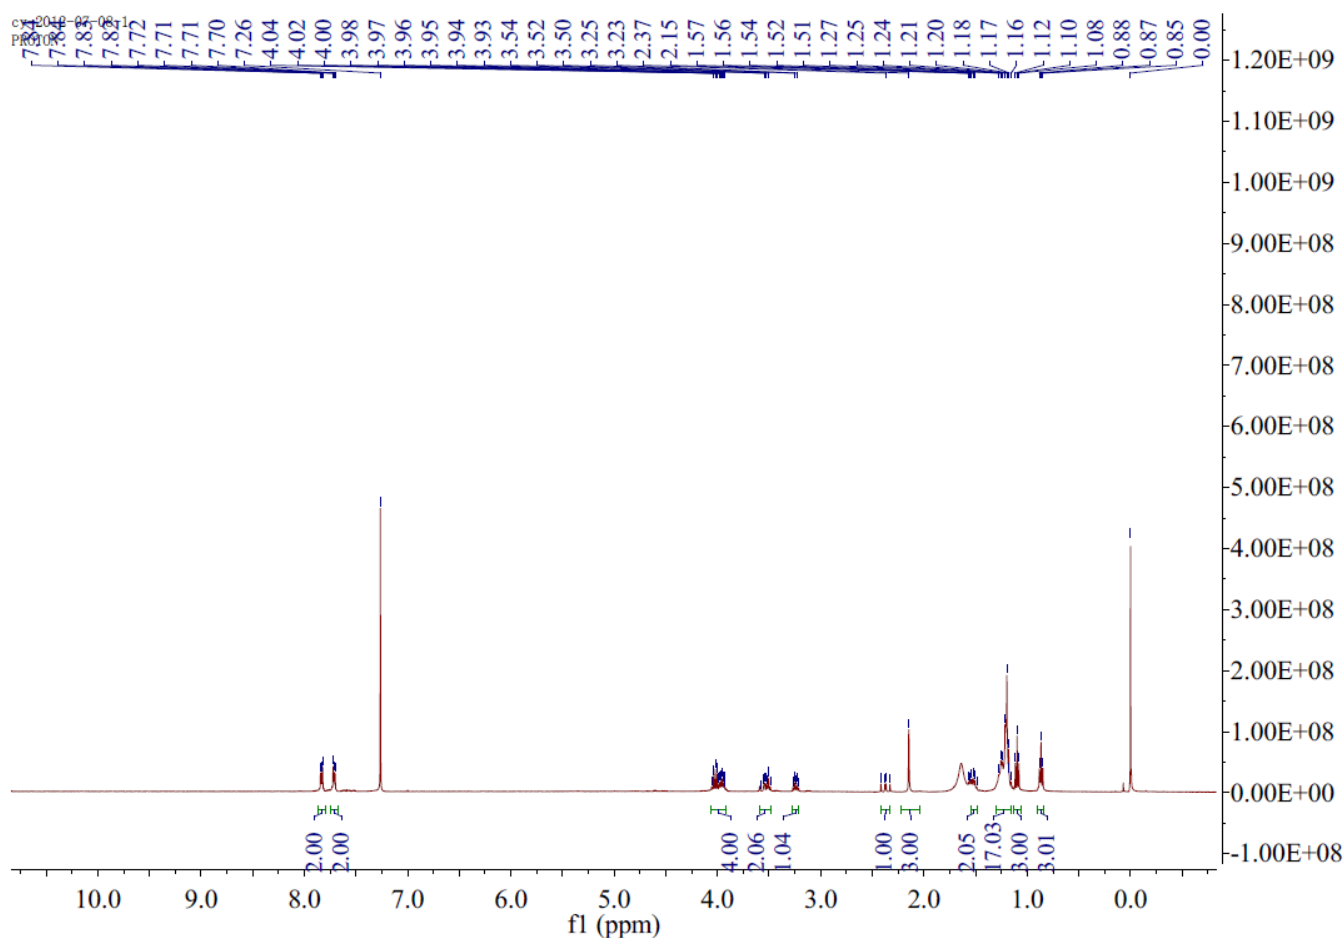

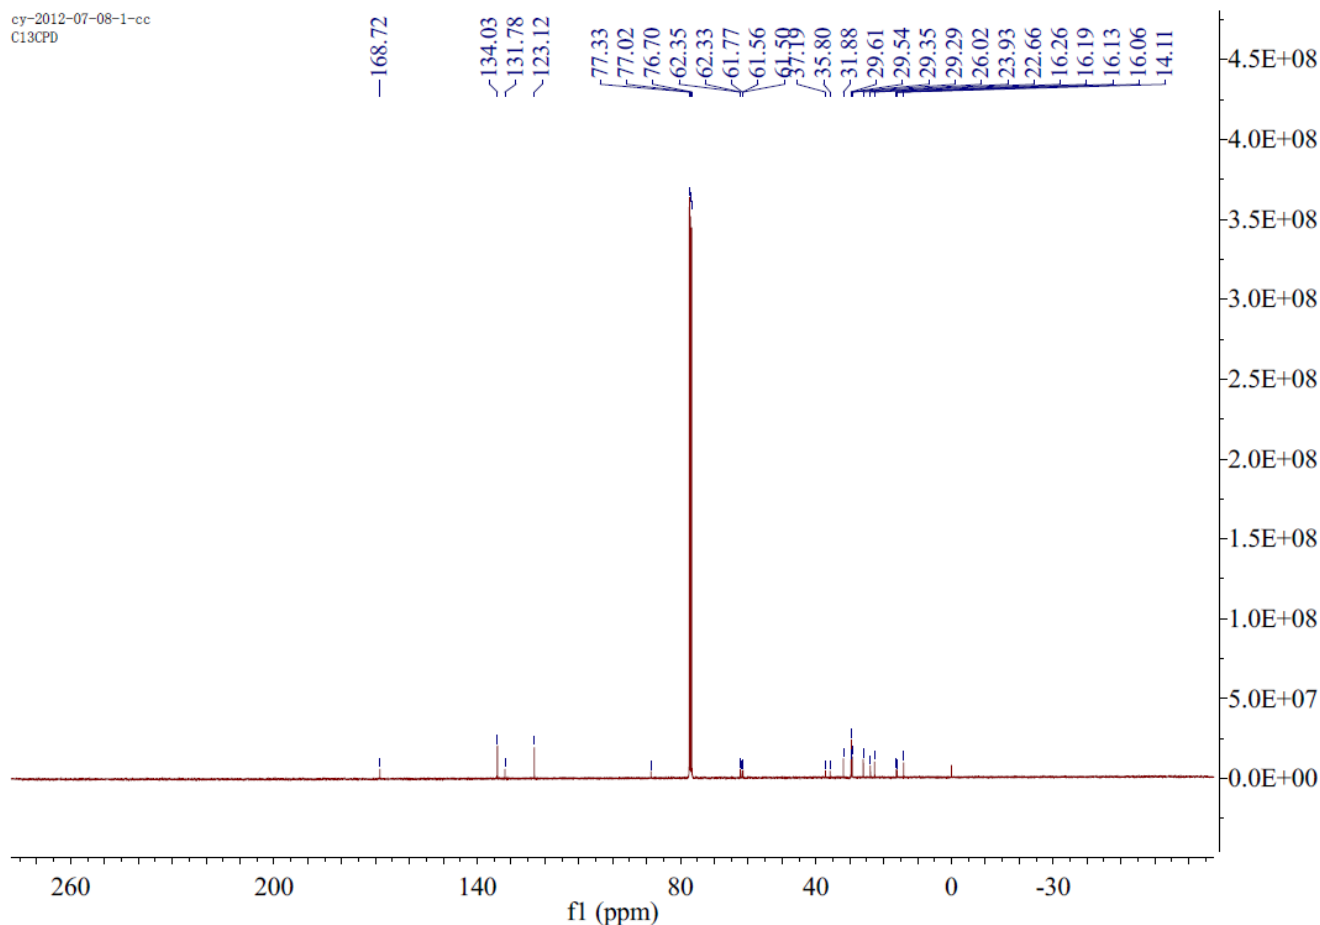

**Diethyl (2-(1,3-dioxoisindolin-2-yl)-2-isopropoxypropyl)phosphonate (8p):**

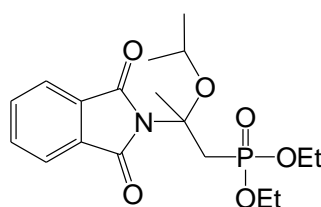

Colourless oil;  $^1\text{H}$  NMR (400 MHz,  $\text{CDCl}_3$ ):  $\delta$  7.82-7.87 (m, 2H), 7.69-7.75 (m, 2H), 3.92-4.08 (m, 5H, 2OCH<sub>2</sub>, CH), 3.61-3.75 (dd,  $J$  = 19.7, 15.5 Hz, 1H, CH<sub>2</sub>-P), 2.33 (dd,  $J$  = 19.7, 15.5 Hz, 1H, CH<sub>2</sub>-P), 2.20 (s, 3H, CH<sub>3</sub>), 1.21 (t,  $J$  = 6.8 Hz, 6H, 2CH<sub>3</sub>), 1.09 (t,  $J$  = 7.0 Hz, 3H, CH<sub>3</sub>), 1.01 (d,  $J$  = 6.1

Hz, 3H, CH<sub>3</sub>);  $^{13}\text{C}$  NMR (101 MHz,  $\text{CDCl}_3$ ):  $\delta$  169.02 (C=O), 134.08, 131.79, 123.13 (Ph), 88.55 (O-C-N), 65.82 (d,  $J$  = 2.6 Hz, OCH), 61.74 (d,  $J$  = 6.5 Hz, OCH<sub>2</sub>), 61.46 (d,  $J$  = 6.5 Hz, OCH<sub>2</sub>), 36.88 (d,  $J$  = 139.2 Hz, C-P), 25.00 (CH<sub>3</sub>), 24.55 (CH<sub>3</sub>), 23.60 (CH<sub>3</sub>), 16.23 (d,  $J$  = 6.4 Hz, CH<sub>3</sub>), 16.07 (d,  $J$  = 6.4 Hz, CH<sub>3</sub>).  $^{31}\text{P}$  NMR (162 MHz,  $\text{CDCl}_3$ ):  $\delta$  24.55 (s); ESI-HRMS calcd for  $[\text{C}_{18}\text{H}_{26}\text{NO}_6\text{P}, \text{M}+\text{Na}]^+$ : 406.1390; Found: 406.1394.

cy-2013-01-07-5  
PROTON

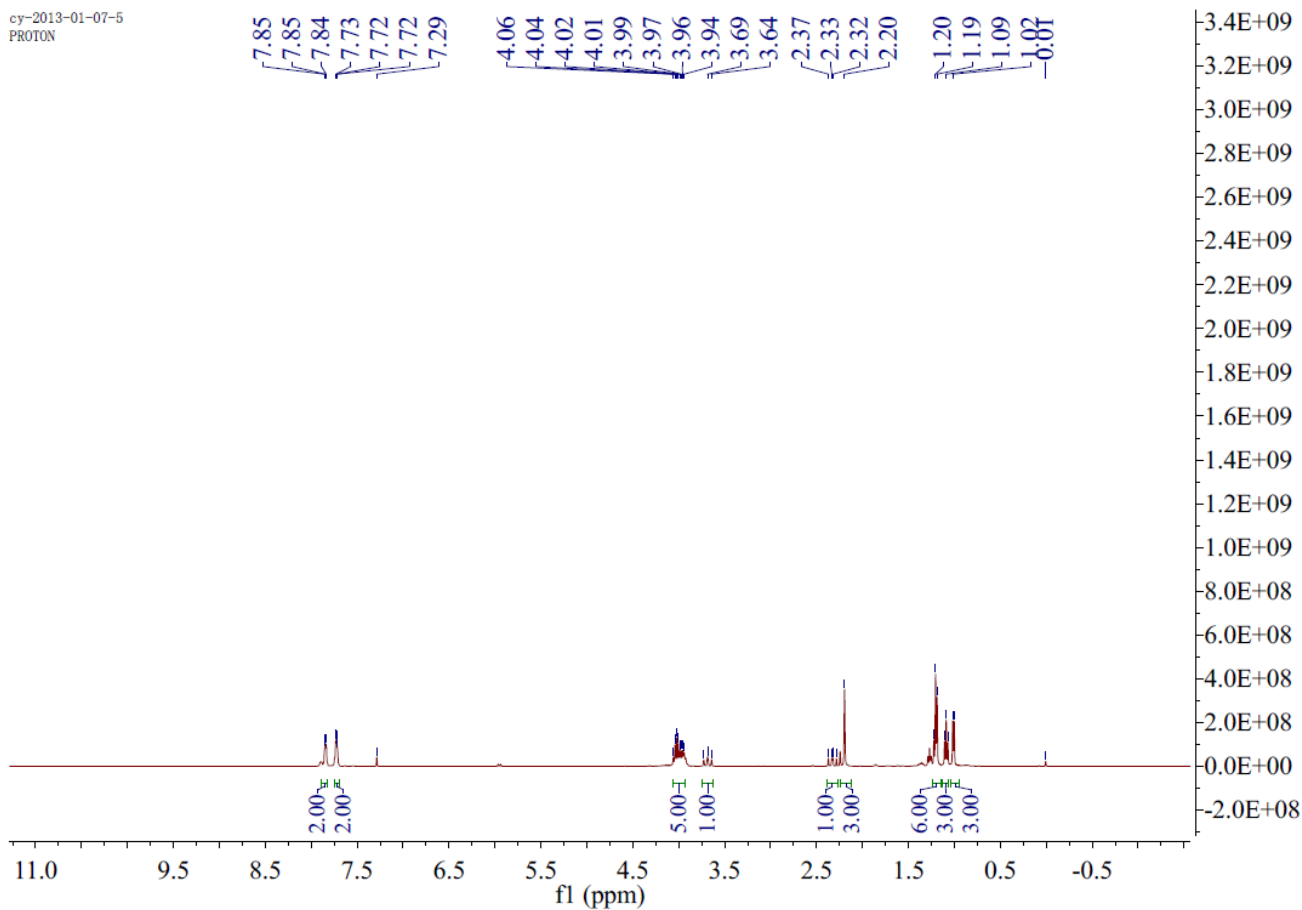

cy-2013-01-07-5  
C13CPD

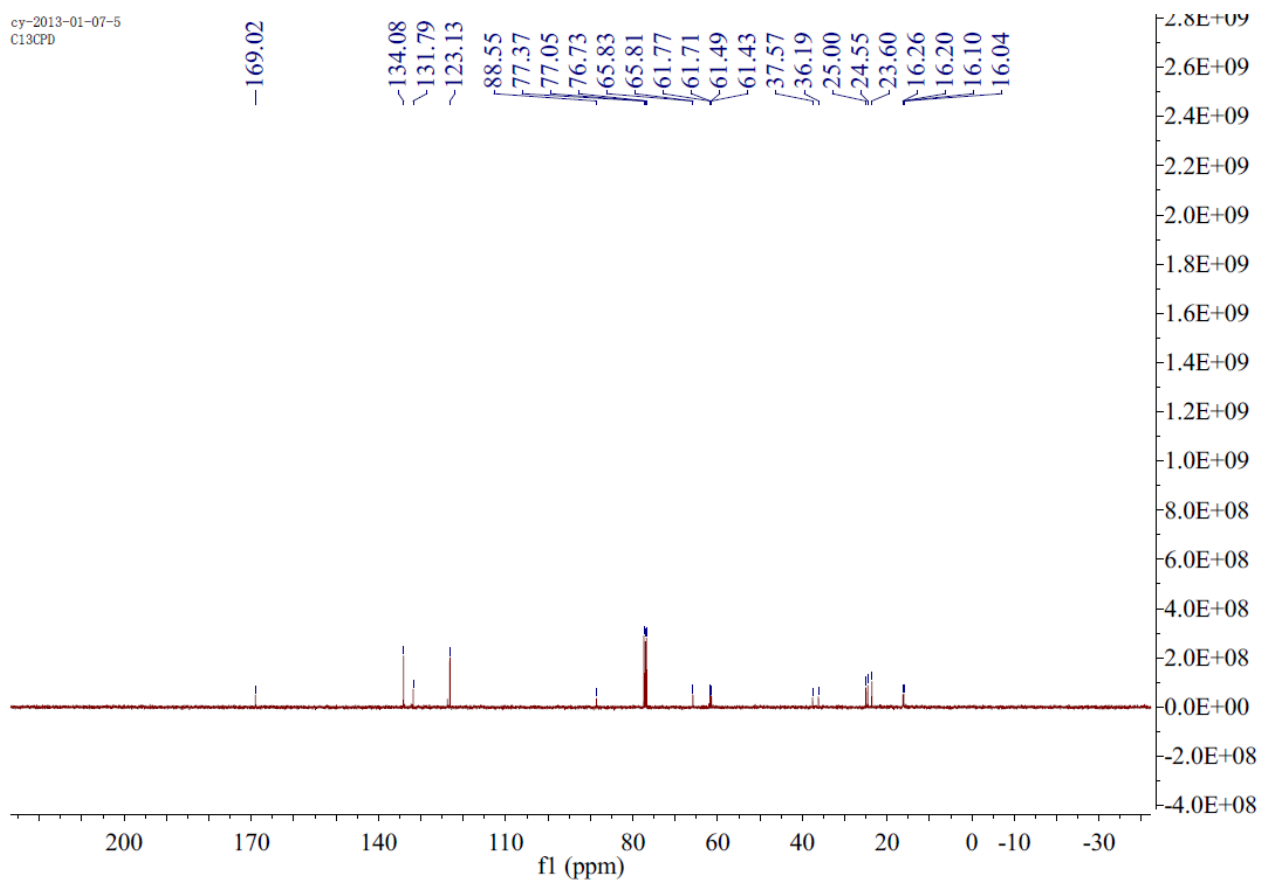

**Diethyl (2-(cyclohexyloxy)-2-(1,3-dioxoisindolin-2-yl)propyl)phosphonate (8q):**

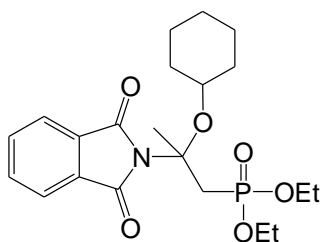

Colourless oil;  $^1\text{H}$  NMR (400 MHz,  $\text{CDCl}_3$ ):  $\delta$  7.84-7.87 (m, 2H, Ph), 7.70-7.73 (m, 2H, Ph), 3.92-4.08 (m, 4H,  $2\text{OCH}_2$ ), 3.58-3.76 (m, 2H, CH,  $\text{CH}_2\text{P}$ ), 2.34 (dd,  $J = 19.2, 16.0$ , Hz, 1H,  $\text{CH}_2\text{P}$ ), 2.20 (s, 3H,  $\text{CH}_3$ ), 1.29-1.88 (m, 8H,  $4\text{CH}_2$ ). 1.07-1.22 (m, 8H,  $\text{CH}_2$ ,  $2\text{CH}_3$ );  $^{13}\text{C}$  NMR (101 MHz,  $\text{CDCl}_3$ ):  $\delta$  169.01 (C=O), 134.05, 131.81, 123.14 (Ph), 88.50 (O-C-N), 71.86 (CH), 61.73 (d,  $J = 6.3$  Hz,  $\text{OCH}_2$ ), 61.44 (d,  $J = 6.3$  Hz,  $\text{OCH}_2$ ), 36.91 (d,  $J = 138.7$  Hz, C-P), 34.69 ( $\text{CH}_2$ ), 33.73 ( $\text{CH}_2$ ), 25.35 ( $\text{CH}_2$ ), 25.07 ( $\text{CH}_2$ ), 24.52 ( $\text{CH}_2$ ), 24.48 ( $\text{CH}_3$ ), 16.23 (d,  $J = 6.4$  Hz,  $\text{CH}_3$ ), 16.07 (d,  $J = 6.4$  Hz,  $\text{CH}_3$ );  $^{31}\text{P}$  NMR (162 MHz,  $\text{CDCl}_3$ ):  $\delta$  24.63 (s); ESI-HRMS calcd for  $[\text{C}_{21}\text{H}_{30}\text{NO}_6\text{P}, \text{M}+\text{Na}]^+$ : 446.1703; Found: 446.1702.

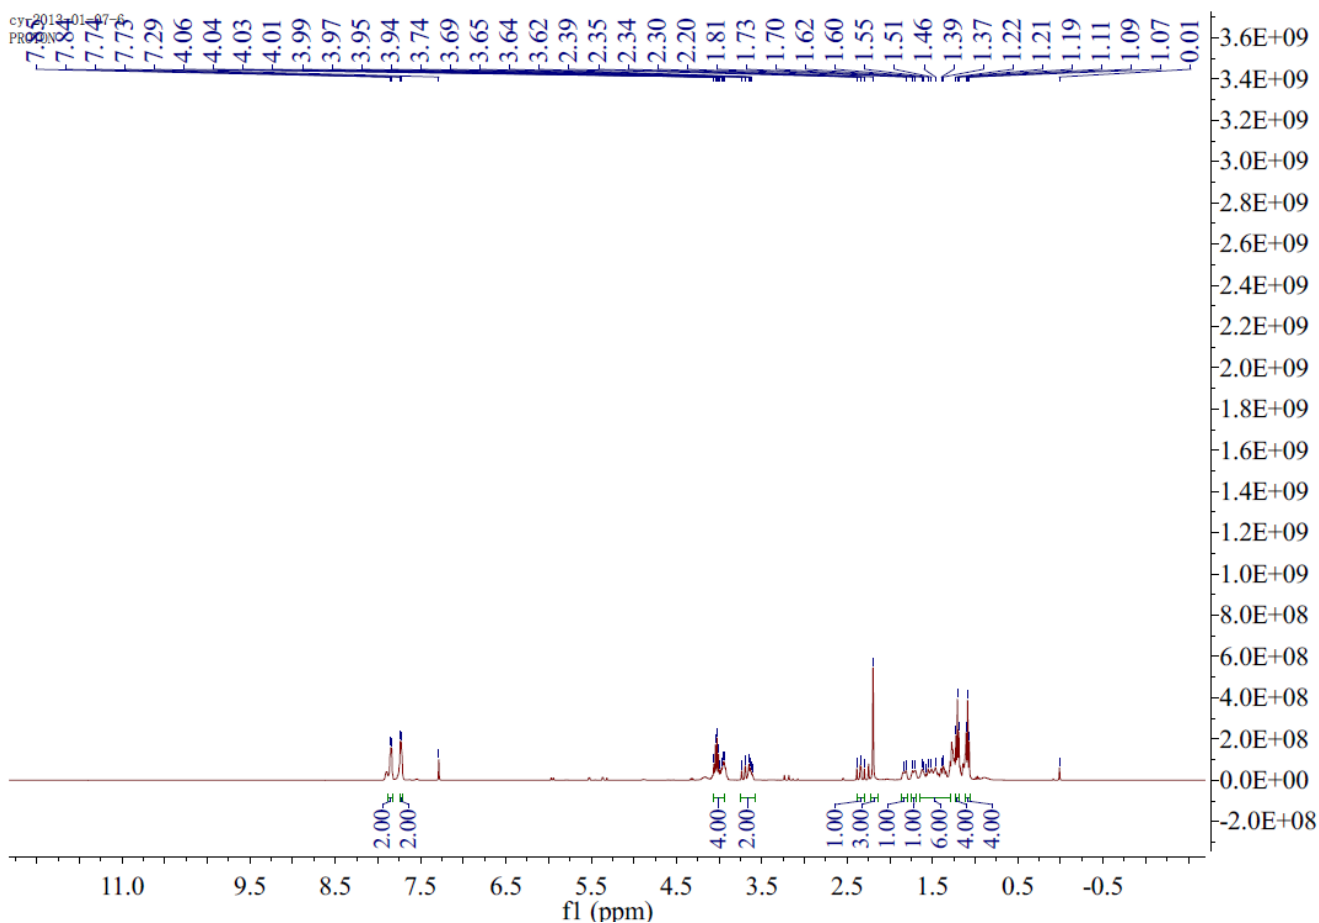

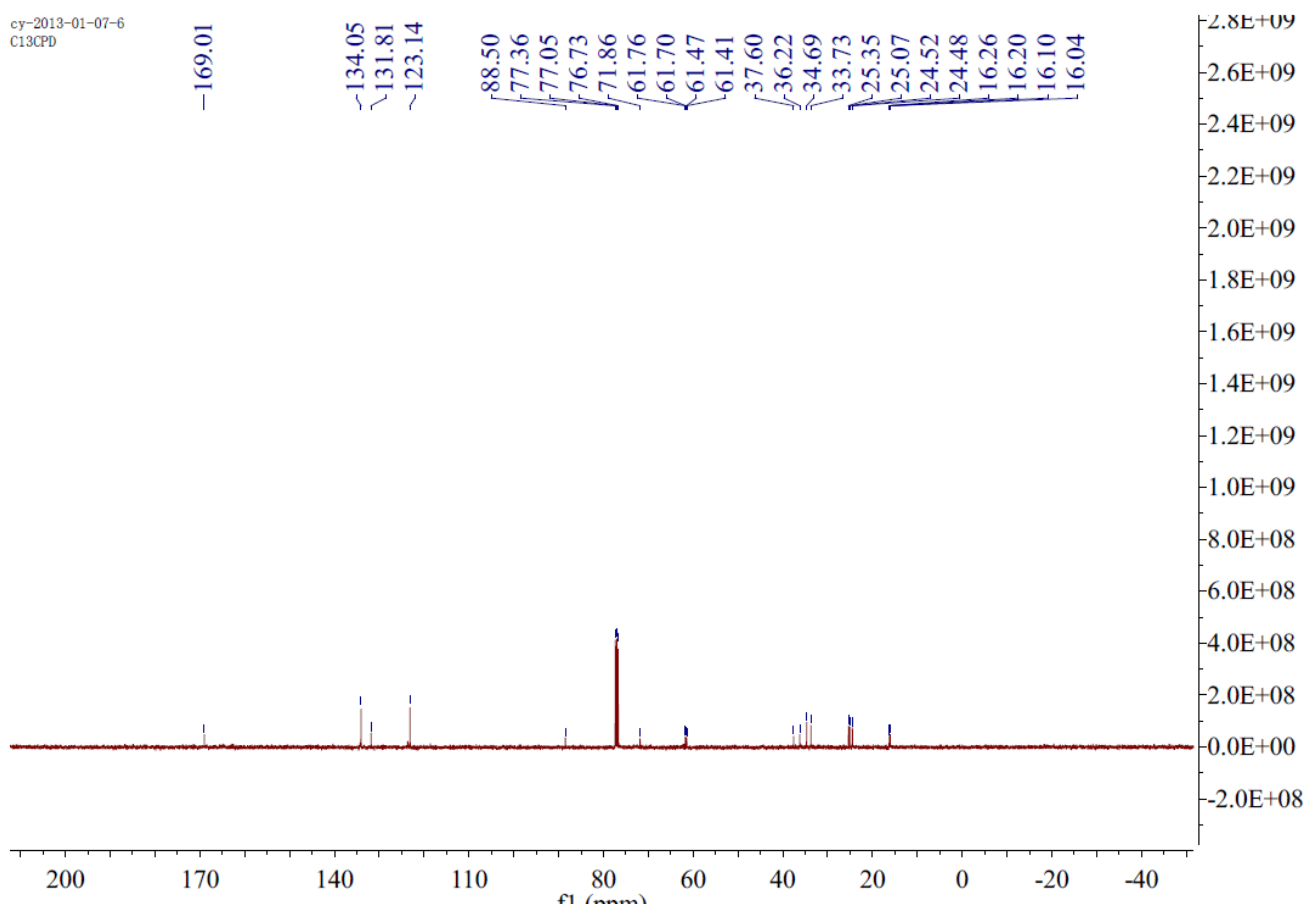

**Dimethyl (2-(1,3-dioxoisindolin-2-yl)-2-methoxypropyl)phosphonate (8s):**

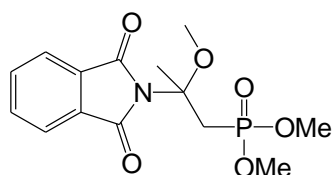

Colourless oil;  $^1\text{H}$  NMR (400 MHz,  $\text{CDCl}_3$ ):  $\delta$  7.82-7.87 (m, 2H, Ph), 7.71-7.75 (m, 2H, Ph), 3.67 (d,  $J = 11.0$  Hz, 3H,  $\text{OCH}_3$ ), 3.61 (d,  $J = 11.0$  Hz, 3H,  $\text{OCH}_3$ ), 3.44 (dd,  $J = 19.1, 15.6$  Hz, 1H,  $\text{CH}_2\text{-P}$ ), 3.27 (s, 3H,  $\text{OCH}_3$ ), 2.47 (dd,  $J = 19.1, 15.6$  Hz, 1H,  $\text{CH}_2\text{-P}$ ), 2.14 (s, 3H,  $\text{CH}_3$ );  $^{13}\text{C}$  NMR (101

MHz,  $\text{CDCl}_3$ ):  $\delta$  168.74 ( $\text{C=O}$ ), 134.20, 131.63, 123.22 (Ph), 89.08 ( $\text{O-C-N}$ ), 52.54 (d,  $J = 6.5$  Hz,  $\text{OCH}_3$ ), 52.34 (d,  $J = 6.5$  Hz,  $\text{OCH}_3$ ), 49.96 (d,  $J = 2.6$  Hz,  $\text{OCH}_3$ ), 35.35 (d,  $J = 141.0$  Hz,  $\text{C-P}$ ), 23.31 ( $\text{CH}_3$ );  $^{31}\text{P}$  NMR (162 MHz,  $\text{CDCl}_3$ ):  $\delta$  27.08 (s); ESI-HRMS calcd for  $[\text{C}_{14}\text{H}_{18}\text{NO}_6\text{P}, \text{M}+\text{Na}]^+$ : 350.0764; Found: 350.0763.



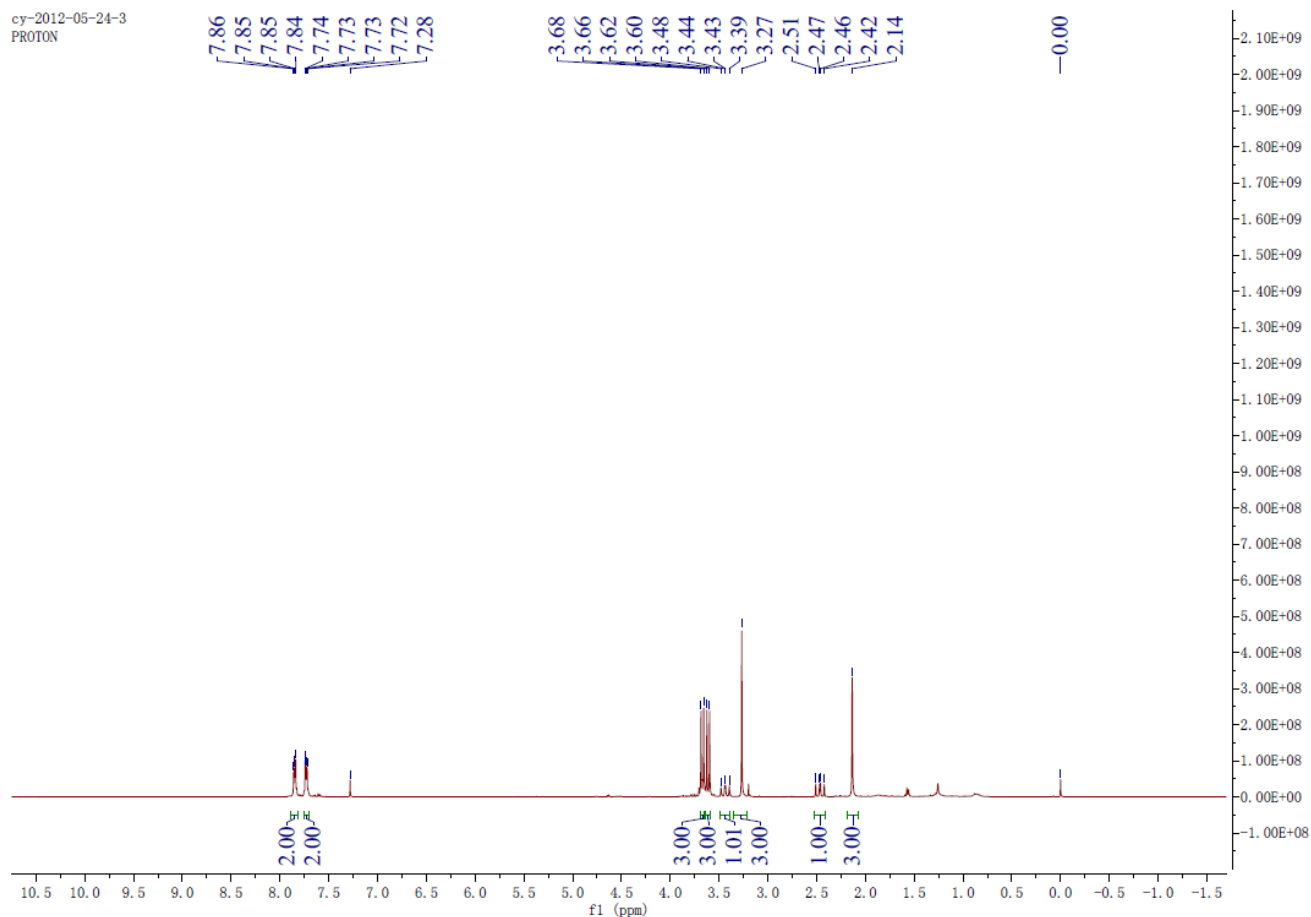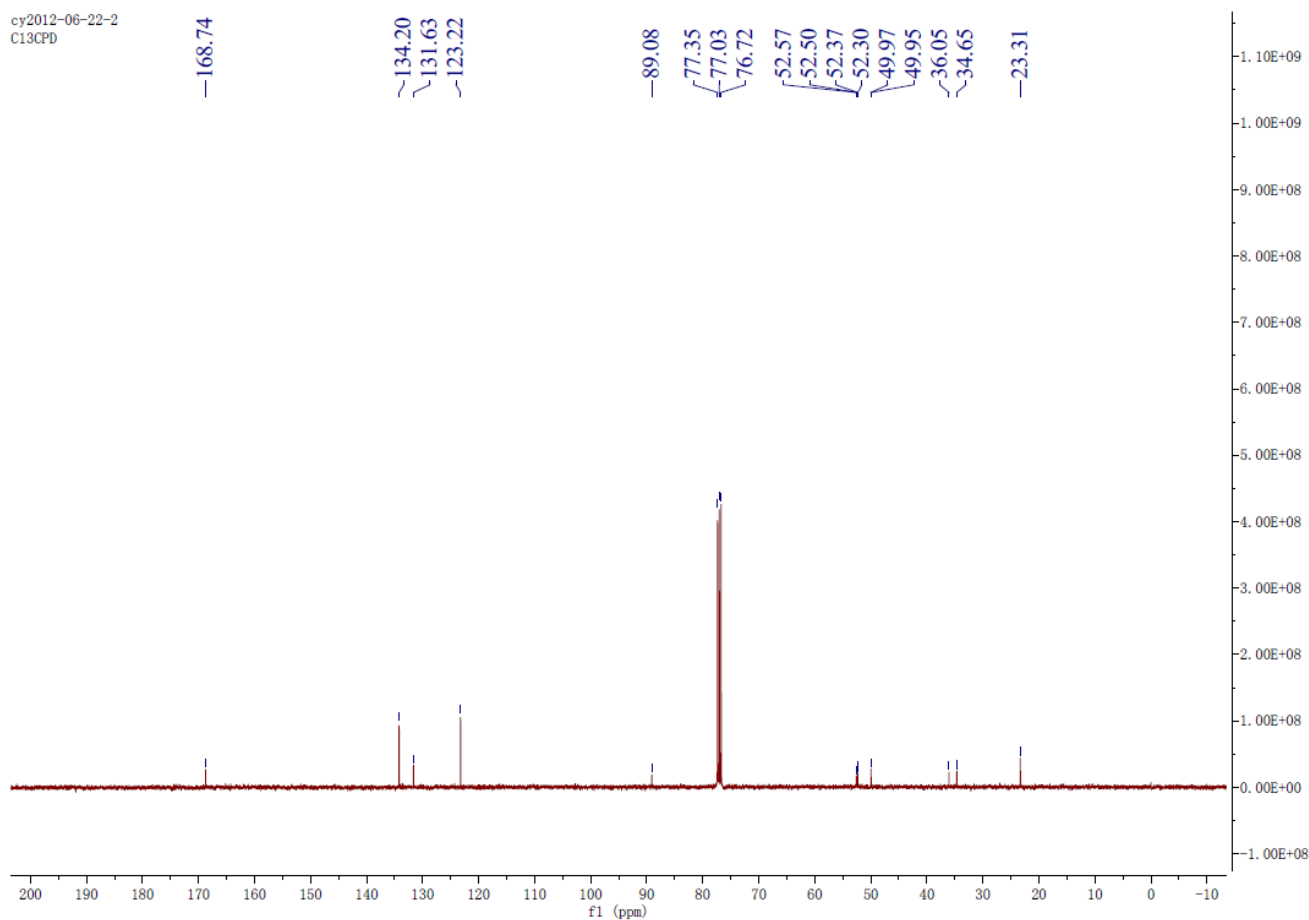

**Dimethyl (2-(benzyloxy)-2-(1,3-dioxisoindolin-2-yl)propyl)phosphonate (8t):**

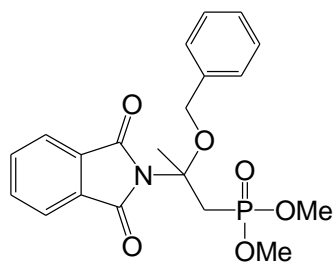

Colourless oil;  $^1\text{H}$  NMR (400 MHz,  $\text{CDCl}_3$ ):  $\delta$  7.81-7.85 (m, 2H, Ph), 7.68-7.74 (m, 2H, Ph), 7.32 (d,  $J = 7.2$  Hz, 2H, Ph), 7.24-7.28 (m, 2H, Ph), 7.20 (t,  $J = 7.1$  Hz, 1H, Ph), 4.61 (d,  $J = 11.2$  Hz, 1H,  $\text{OCH}_2\text{Ph}$ ), 4.45 (d,  $J = 11.2$  Hz, 1H,  $\text{OCH}_2\text{Ph}$ ), 3.64 (d,  $J = 11.0$  Hz, 3H,  $\text{OCH}_3$ ), 3.53-3.62 (m, 4H,  $\text{OCH}_3$ ,  $\text{CH}_2\text{-P}$ ), 2.55 (dd,  $J = 19.7, 15.5$  Hz, 1H,  $\text{CH}_2\text{-P}$ ), 2.26 (s, 3H,  $\text{CH}_3$ );  $^{13}\text{C}$  NMR (101 MHz,  $\text{CDCl}_3$ ):  $\delta$  168.72 (C=O), 137.32, 134.17, 131.62, 128.34, 127.71, 127.57, 123.20 (Ph), 88.91 (O-C-N), 64.90 (d,  $J = 2.5$  Hz,  $\text{OCH}_2\text{Ph}$ ), 52.55 (d,  $J = 6.5$  Hz,  $\text{OCH}_3$ ), 52.33 (d,  $J = 6.5$  Hz,  $\text{OCH}_3$ ), 35.58 (d,  $J = 140.2$  Hz, C-P), 24.19 ( $\text{CH}_3$ );  $^{31}\text{P}$  NMR (162 MHz,  $\text{CDCl}_3$ ):  $\delta$  27.09 (s); ESI-HRMS calcd for  $[\text{C}_{20}\text{H}_{22}\text{NO}_6\text{P}, \text{M}+\text{Na}]^+$ : 426.1077; Found: 426.1076.

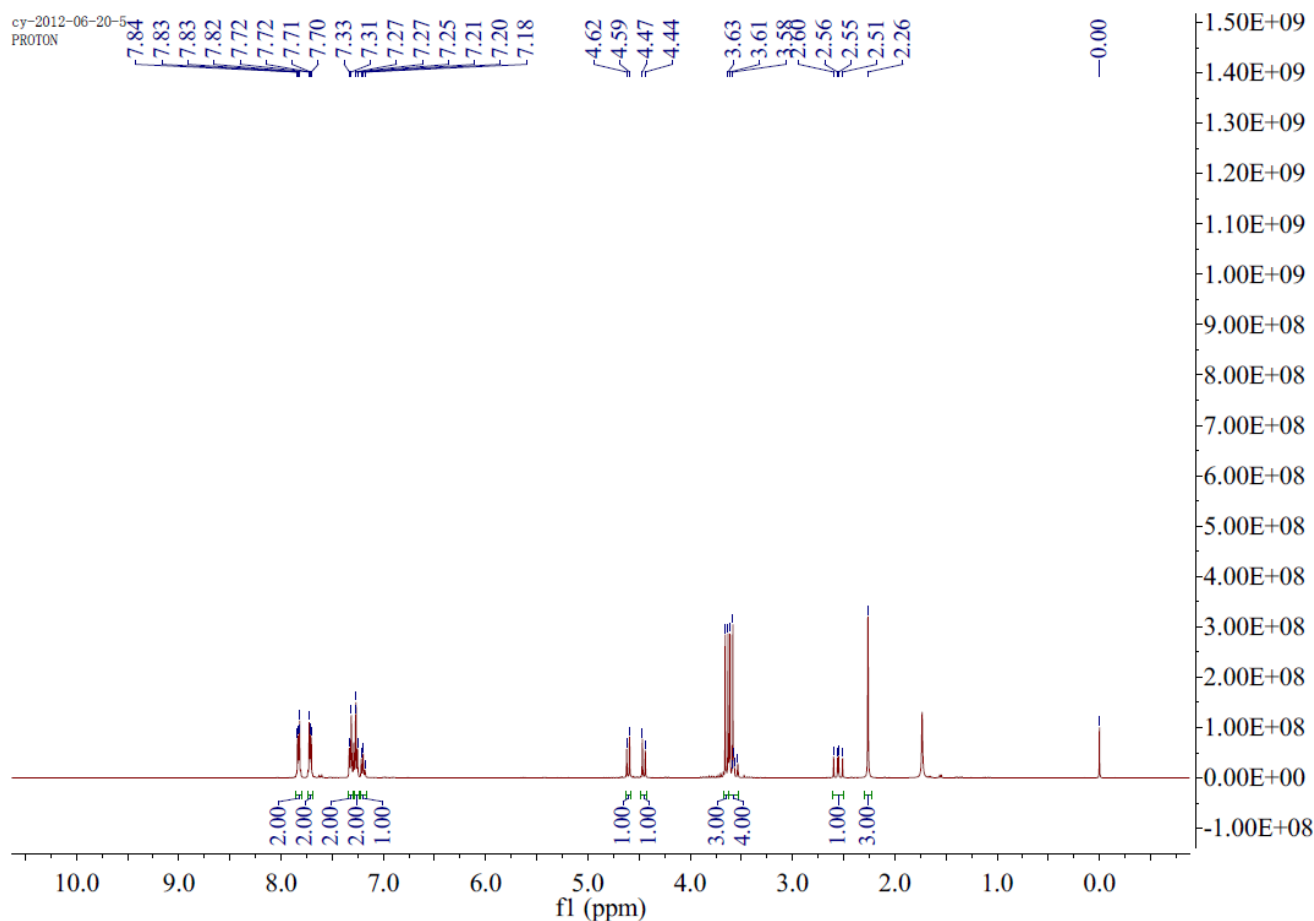

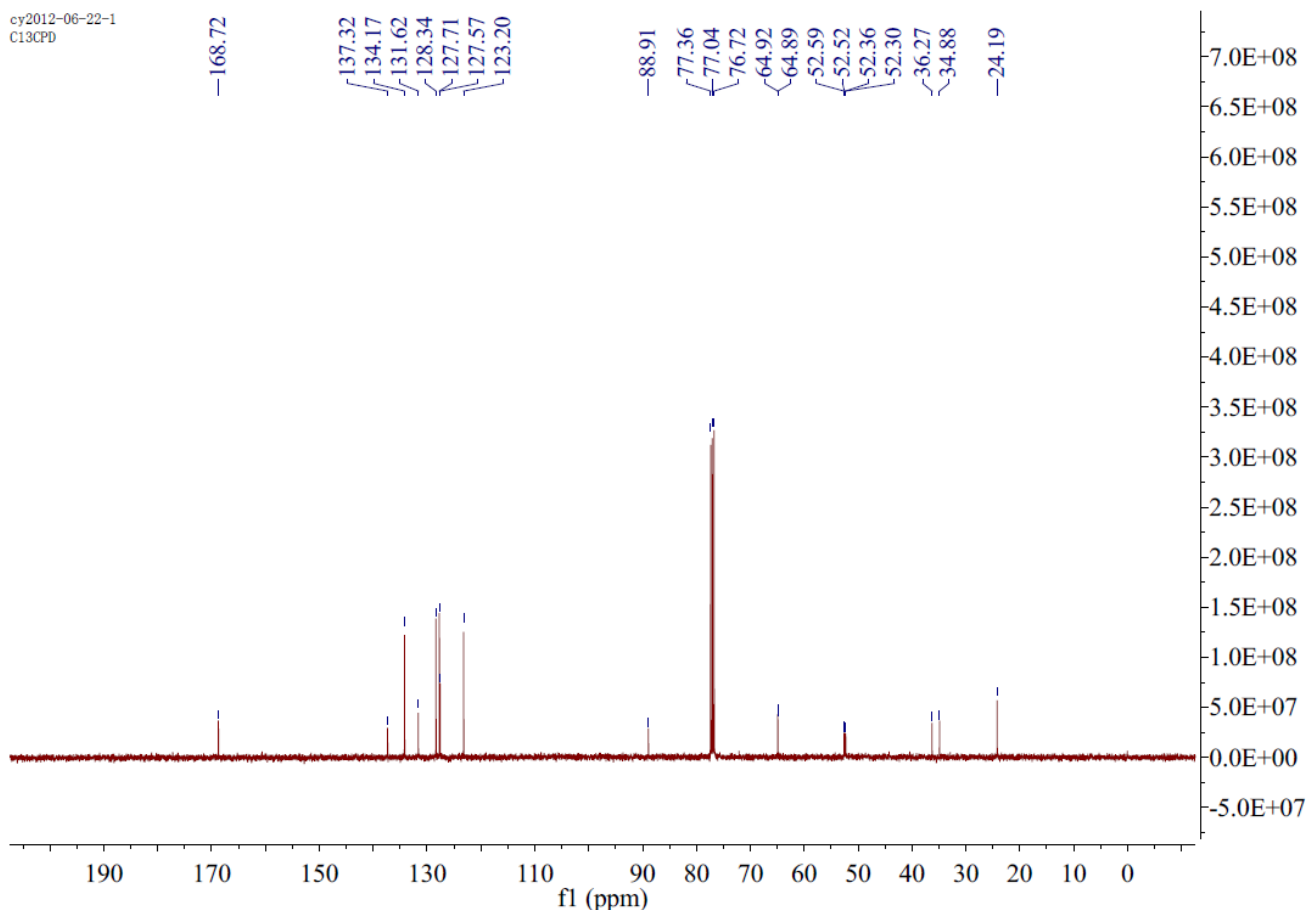

**Dimethyl (2-(1,3-dioxoisindolin-2-yl)-2-((4-fluorobenzyl)oxy)propyl)phosphonate (8u):**

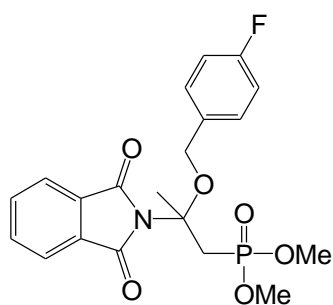

Colourless oil;  $^1\text{H}$  NMR (400 MHz,  $\text{CDCl}_3$ ):  $\delta$  7.82-7.87 (m, 2H, Ph), 7.71-7.77 (m, 2H, Ph), 7.25-7.35 (m, 2H, Ph), 6.93-7.01 (m, 2H, Ph), 4.58 (d,  $J$  = 11.0 Hz, 1H,  $\text{OCH}_2\text{Ar}$ ), 4.43 (d,  $J$  = 11.0 Hz, 1H,  $\text{OCH}_2\text{Ar}$ ), 3.66 (d,  $J$  = 11.0 Hz, 3H,  $\text{OCH}_3$ ), 3.61 (d,  $J$  = 11.0 Hz, 3H,  $\text{OCH}_3$ ), 3.55 (dd,  $J$  = 16.6, 13.5 Hz, 1H,  $\text{CH}_2\text{-P}$ ), 2.56 (dd,  $J$  = 19.7, 15.5 Hz, 1H,  $\text{CH}_2\text{-P}$ ), 2.27 (s, 3H,  $\text{CH}_3$ );  $^{13}\text{C}$  NMR (101 MHz,  $\text{CDCl}_3$ ):  $\delta$  168.70 (C=O), 162.27 (d,  $J$  = 245.6 Hz, Ph), 134.24 (Ph), 133.06 (d,  $J$  = 3.1 Hz, Ar), 131.57 (s, Ph), 129.50 (d,  $J$  = 7.9 Hz, Ar), 123.22 (Ph), 115.18 (d,  $J$  = 21.5 Hz, Ar), 88.92 (O-C-N), 64.22 (d,  $J$  = 2.2 Hz,  $\text{OCH}_2\text{Ar}$ ), 52.56 (d,  $J$  = 6.6 Hz,  $\text{OCH}_3$ ), 52.34 (d,  $J$  = 6.6 Hz,  $\text{OCH}_3$ ), 35.55 (d,  $J$  = 140.3 Hz, C-P), 24.17 ( $\text{CH}_3$ );  $^{31}\text{P}$  NMR (162 MHz,  $\text{CDCl}_3$ ):  $\delta$  26.95 (s); ESI-

HRMS calcd for  $[\text{C}_{20}\text{H}_{21}\text{FNO}_6\text{P}, \text{M}+\text{Na}]^+$ : 444.0983; Found: 444.0982.

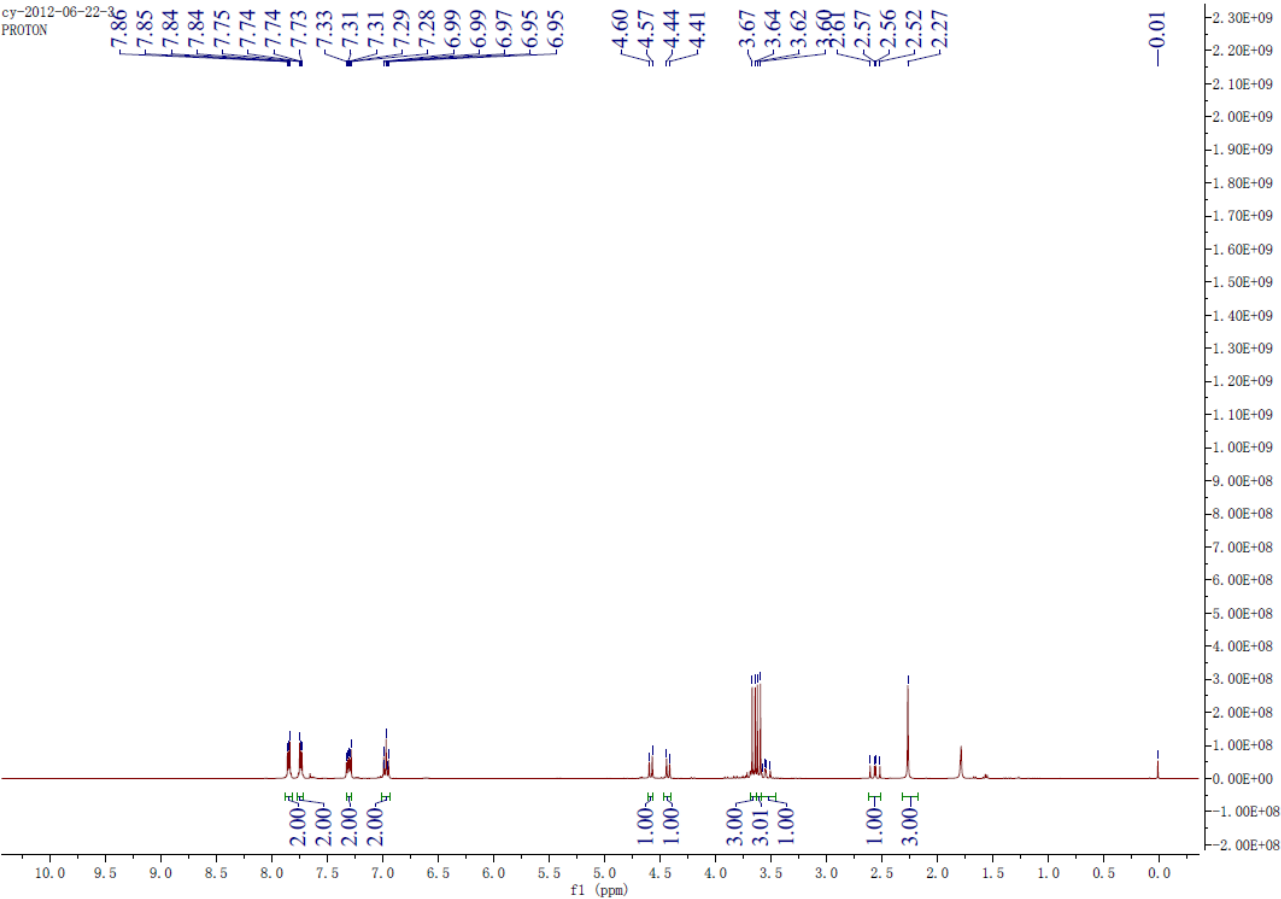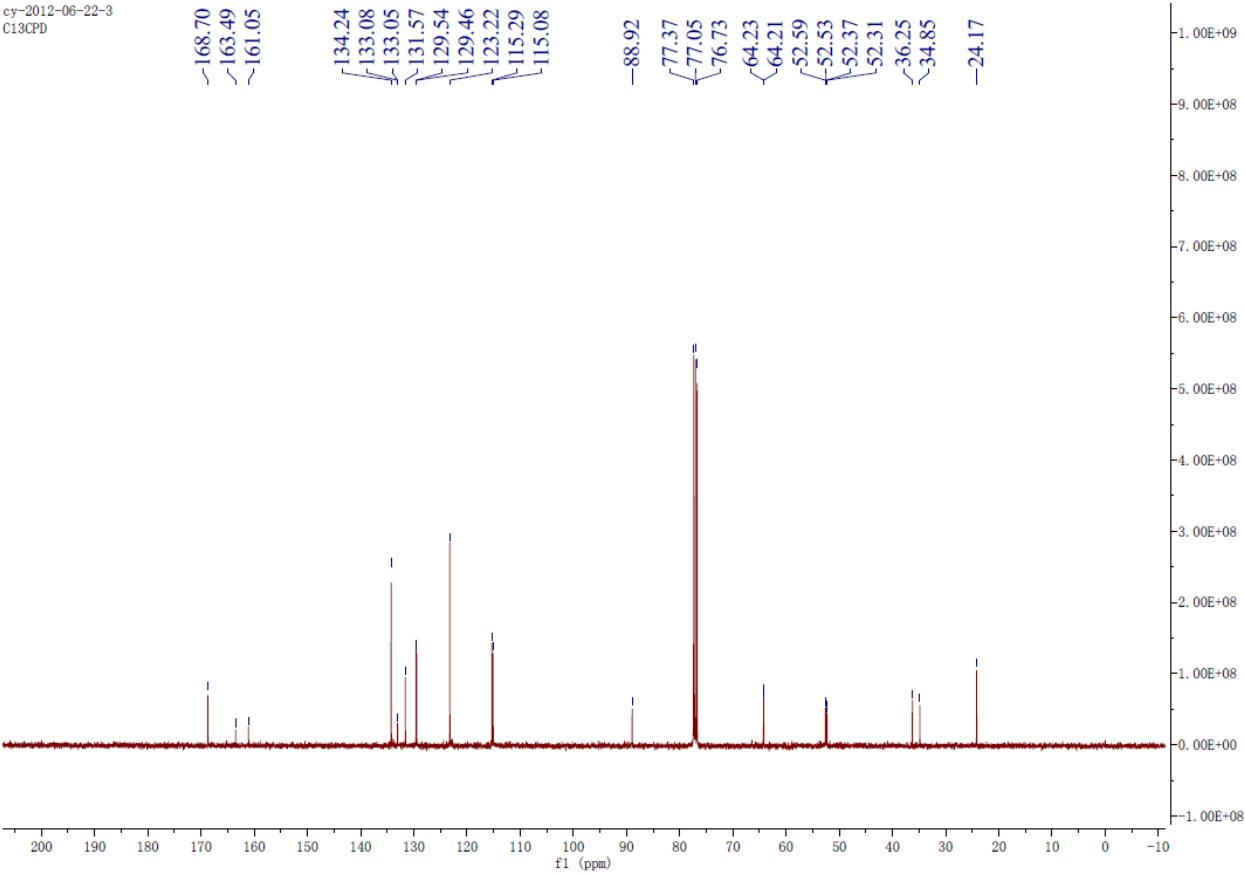

**Diethyl (2-(1,3-dioxoisindolin-2-yl)-2-methoxy-3-phenylpropyl)phosphonate (8v):**

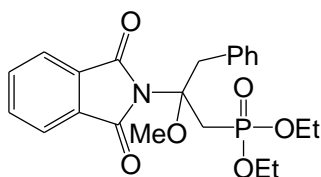

Colourless oil;  $^1\text{H}$  NMR (400 MHz,  $\text{CDCl}_3$ ):  $\delta$  7.82-7.90 (m, 2H, Ph), 7.73-7.80 (m, 2H, Ph), 7.40 (d,  $J = 6.9$  Hz, 1H, Ph), 7.25-7.30 (m, 3H, Ph), 3.97-4.17 (m, 6H,  $2\text{OCH}_2$ ,  $\text{CH}_2\text{Ph}$ ), 3.45 (s, 3H,  $\text{OCH}_3$ ), 3.18-3.31 (m, 1H,  $\text{CH}_2\text{-P}$ ), 2.52-2.68 (m, 1H,  $\text{CH}_2\text{-P}$ ), 1.29 (t,  $J = 7.0$  Hz, 3H,  $\text{CH}_3$ ), 1.18 (t,  $J = 7.0$  Hz, 3H,  $\text{CH}_3$ );  $^{13}\text{C}$  NMR (101 MHz,  $\text{CDCl}_3$ ):  $\delta$  168.60 (C=O), 135.75, 134.24, 131.51, 130.89, 128.27, 126.92, 123.24 (Ph), 92.91 (N-C-O), 61.97 (d,  $J = 6.5$  Hz,  $\text{OCH}_2$ ), 61.53 (d,  $J = 6.5$  Hz,  $\text{OCH}_2$ ), 50.45 (s,  $\text{OCH}_3$ ), 38.88 ( $\text{CH}_2\text{Ph}$ ), 31.12 (d,  $J = 141.4$  Hz, C-P), 16.34 (d,  $J = 6.3$  Hz,  $\text{CH}_3$ ), 16.16 (d,  $J = 6.3$  Hz,  $\text{CH}_3$ );  $^{31}\text{P}$  NMR (162 MHz,  $\text{CDCl}_3$ ):  $\delta$  24.40 (s); ESI-HRMS calcd for  $[\text{C}_{22}\text{H}_{26}\text{NO}_6\text{P}, \text{M}+\text{Na}]^+$ : 454.1390; Found: 454.1394.

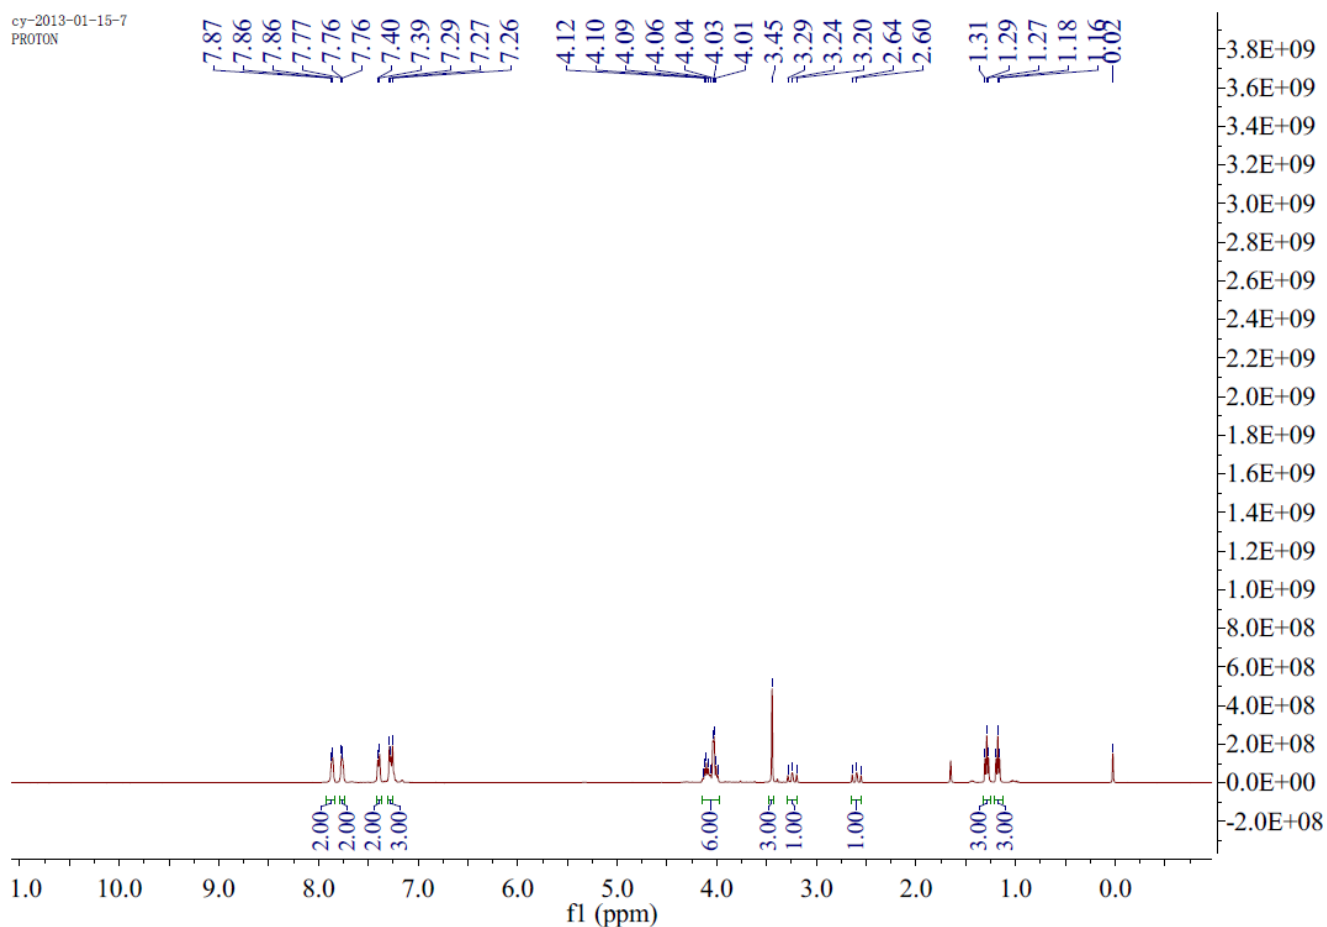

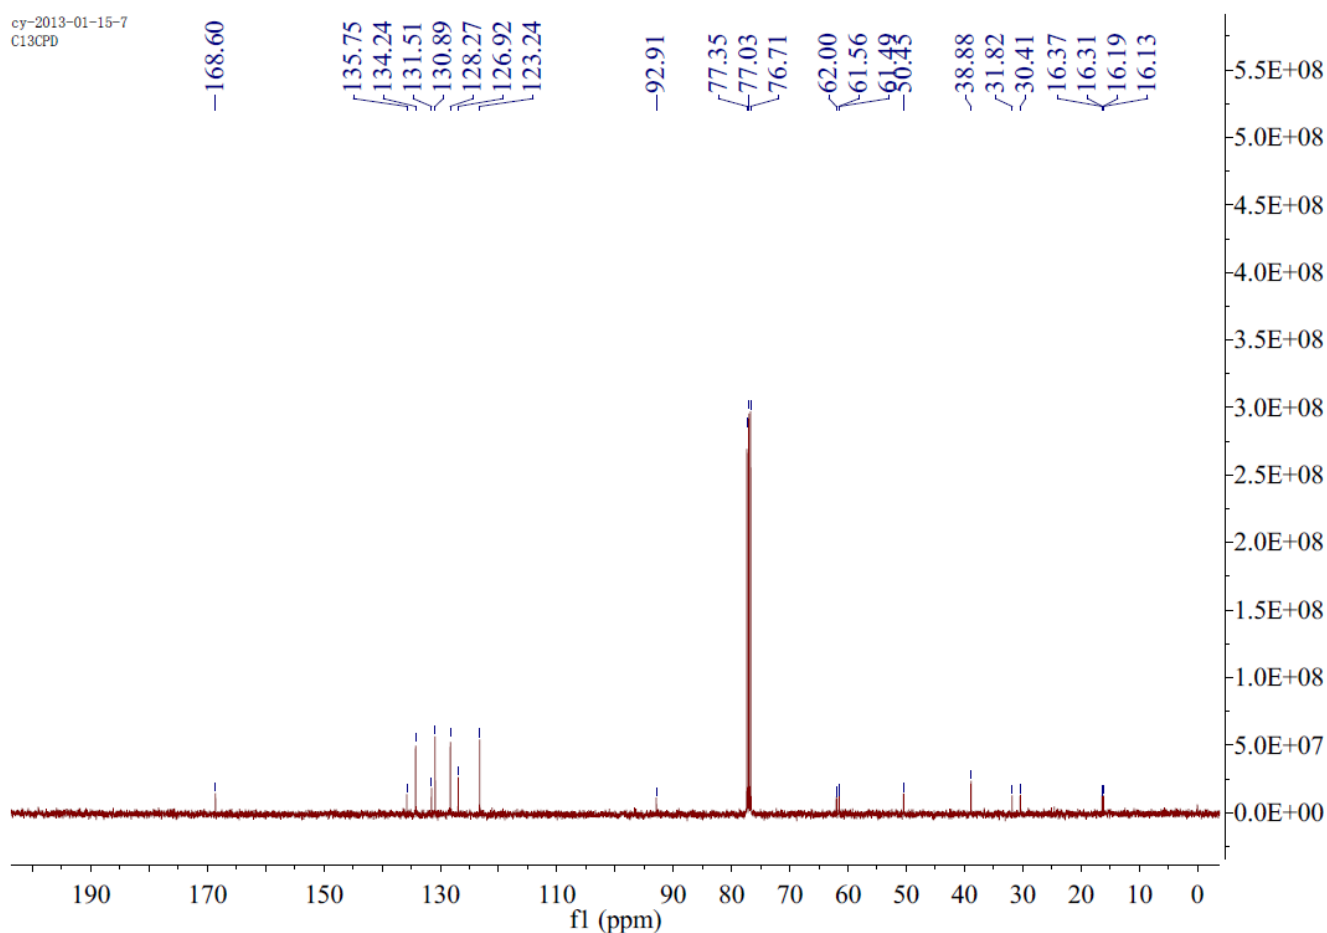

**Diethyl (2-(1,3-dioxoisindolin-2-yl)-2-methoxy-3-methylbutyl)phosphonate (8w):**

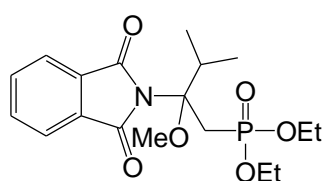

Colourless oil;  $^1\text{H}$  NMR (400 MHz,  $\text{CDCl}_3$ ):  $\delta$  7.81-7.86 (m, 2H, Ph), 7.70-7.74 (m, 2H, Ph), 4.05-4.19 (m, 4H,  $2\text{OCH}_2$ ), 3.51 (s, 3H,  $\text{OCH}_3$ ), 3.26 (dd,  $J = 20.3, 16.1$  Hz, 1H,  $\text{CH}_2\text{-P}$ ), 2.83-3.00 (m, 2H,  $\text{CH}_2\text{-P}$ , CH), 1.29 (t,  $J = 7.0$  Hz, 6H,  $2\text{CH}_3$ ), 1.07 (t,  $J = 7.0$  Hz, 6H,  $2\text{CH}_3$ );  $^{13}\text{C}$  NMR (101 MHz,  $\text{CDCl}_3$ ):  $\delta$  169.18 (C=O), 133.97, 131.78, 123.00 (Ph), 96.61 (O-C-N), 61.87 (d,  $J = 6.4$  Hz,  $\text{OCH}_2$ ), 61.53 (d,  $J = 6.4$  Hz,  $\text{OCH}_2$ ), 53.04 ( $\text{OCH}_3$ ), 37.25 (d,  $J = 5.7$  Hz, CH), 30.99 (d,  $J = 142.1$  Hz, C-P), 18.05 ( $\text{CH}_3$ ), 17.40 ( $\text{CH}_3$ ), 16.33 (d,  $J = 5.5$  Hz,  $\text{CH}_3$ ), 16.28 (d,  $J = 5.5$  Hz,  $\text{CH}_3$ );  $^{31}\text{P}$  NMR (162 MHz,  $\text{CDCl}_3$ ):  $\delta$  25.56 (s); ESI-

HRMS calcd for  $[\text{C}_{18}\text{H}_{26}\text{NO}_6\text{P}, \text{M}+\text{Na}]^+$ : 406.1390; Found: 406.1392.

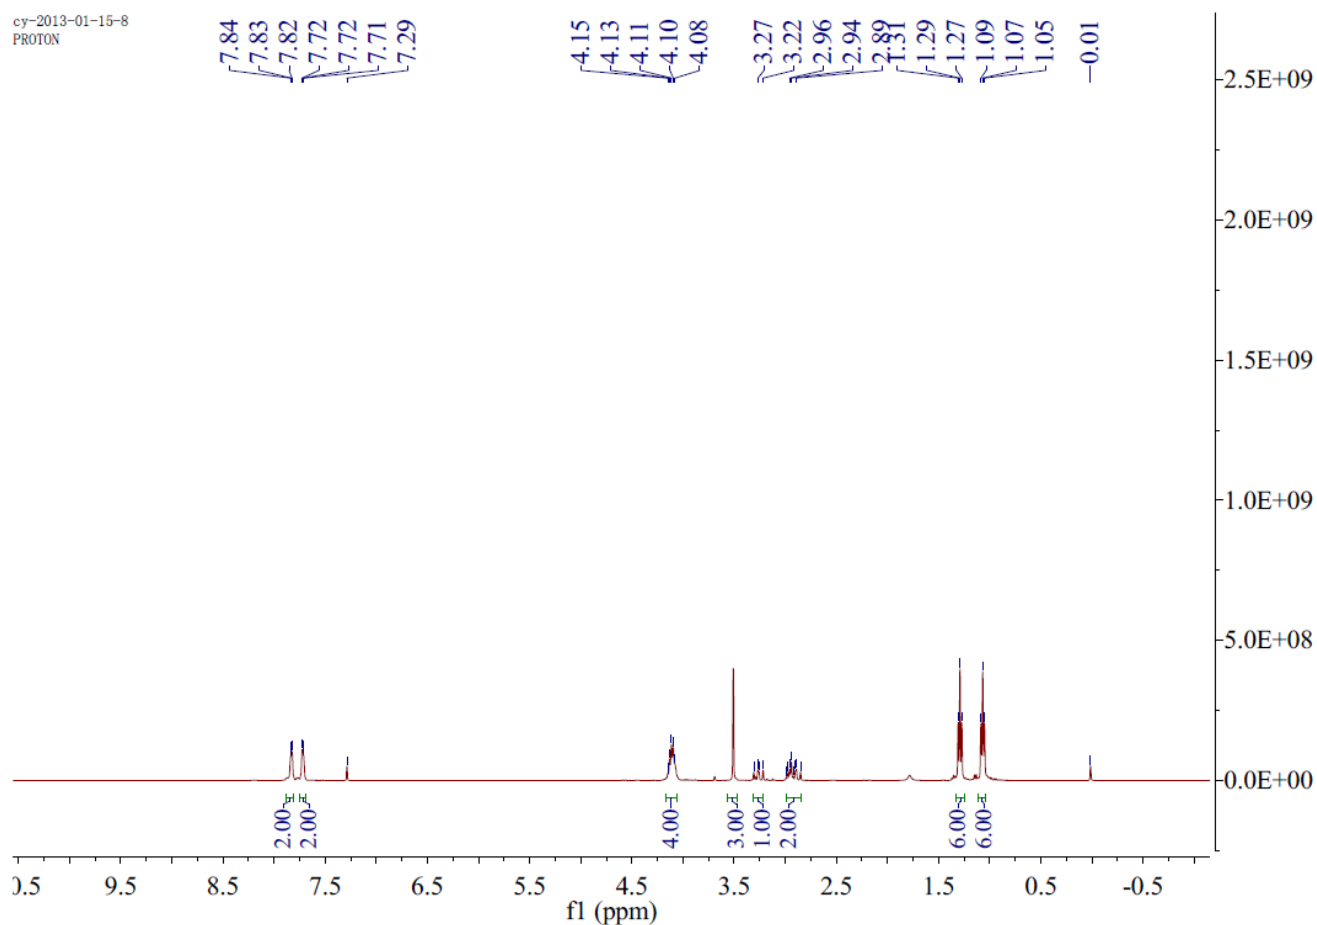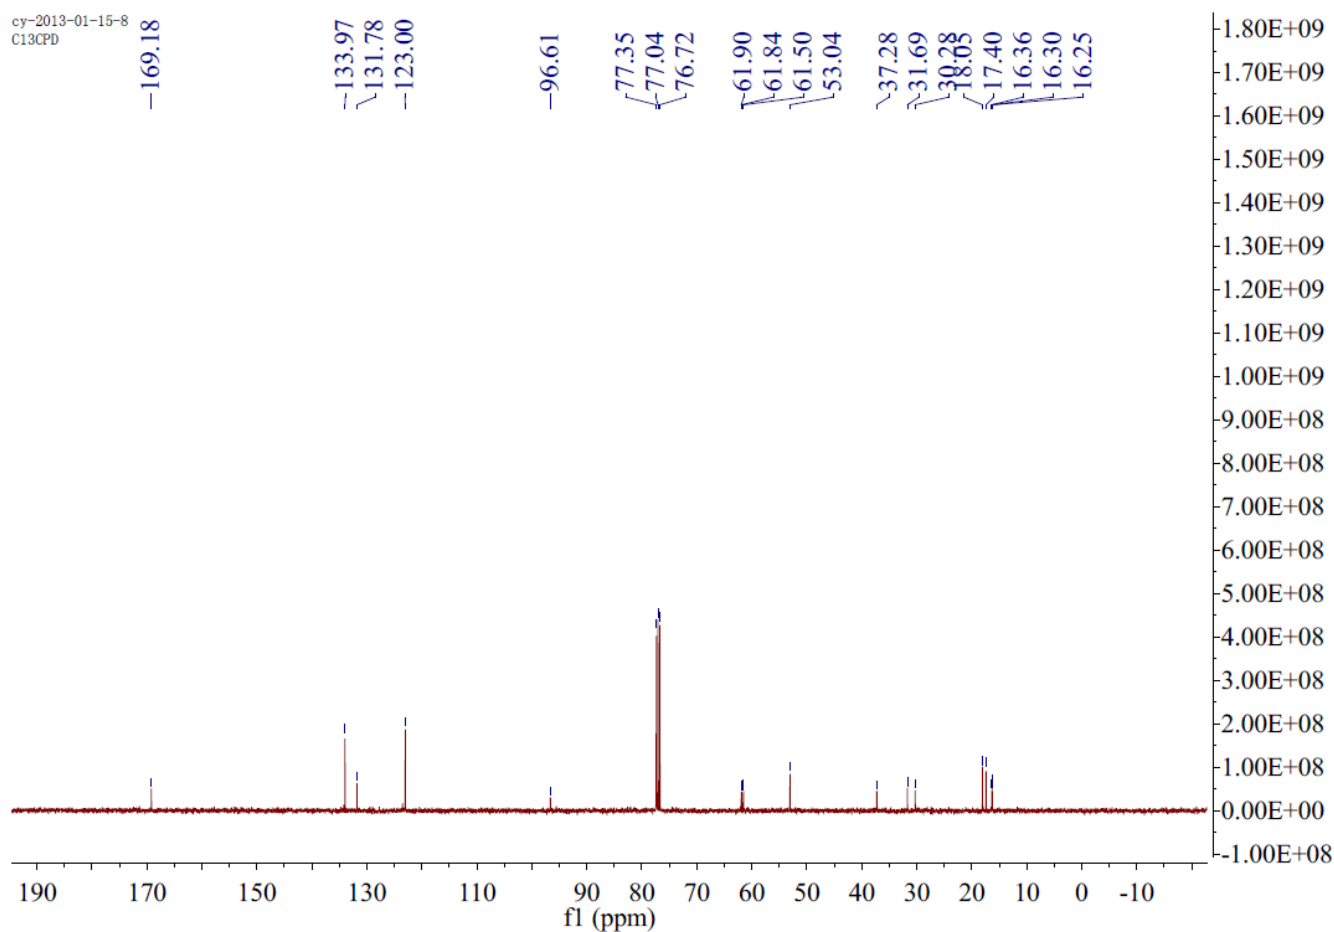

**Diethyl (2-(1,3-dioxoisindolin-2-yl)-2-methoxy-4-methylpentyl)phosphonate (8x):**

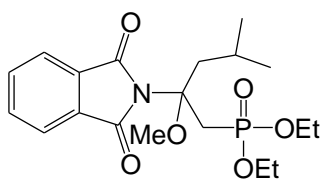

Colourless oil;  $^1\text{H}$  NMR (400 MHz,  $\text{CDCl}_3$ ):  $\delta$  7.83-7.87 (m, 2H, Ph), 7.73-

7.76 (m, 2H, Ph), 3.99-4.11 (m, 4H,  $2\text{OCH}_2$ ), 3.46 (dd,  $J = 19.1, 16.5$  Hz,

1H,  $\text{CH}_2\text{-P}$ ), 3.27 (s, 3H,  $\text{OCH}_3$ ), 2.67-2.84 (m, 2H,  $\text{CH}_2\text{-P}$ ,  $\text{CH}_2$ ), 2.52 (dd,  $J$

= 15.1, 7.2, Hz, 1H,  $\text{CH}_2$ ), 1.92-2.01 (m, 1H, CH), 1.24 (t,  $J = 7.1$  Hz, 3H,  $\text{CH}_3$ ), 1.20 (t,  $J = 7.1$  Hz, 3H,

$\text{CH}_3$ ), 1.07 (d,  $J = 6.6$  Hz, 3H,  $\text{CH}_3$ ), 1.03 (d,  $J = 6.6$  Hz, 3H,  $\text{CH}_3$ );  $^{13}\text{C}$  NMR (101 MHz,  $\text{CDCl}_3$ ):  $\delta$

168.90 (C=O), 134.12, 131.59, 123.14 (Ph), 93.38 (O-C-N), 61.76 (d,  $J = 6.5$  Hz,  $\text{OCH}_2$ ), 61.56 (d,  $J =$

6.5 Hz,  $\text{OCH}_2$ ), 49.99 (d,  $J = 2.0$  Hz,  $\text{OCH}_3$ ), 40.66 ( $\text{CH}_2$ ), 31.59 (d,  $J = 142.3$  Hz, C-P), 24.40 ( $\text{CH}_3$ ),

24.22 ( $\text{CH}_3$ ), 23.10 (CH), 16.29 (d,  $J = 6.5$  Hz,  $\text{CH}_3$ ), 16.20 (d,  $J = 6.5$  Hz,  $\text{CH}_3$ );  $^{31}\text{P}$  NMR (162 MHz,

$\text{CDCl}_3$ ):  $\delta$  24.52 (s); ESI-HRMS calcd for  $[\text{C}_{19}\text{H}_{28}\text{NO}_6\text{P}, \text{M}+\text{Na}]^+$ : 420.1546; Found: 420.1550.

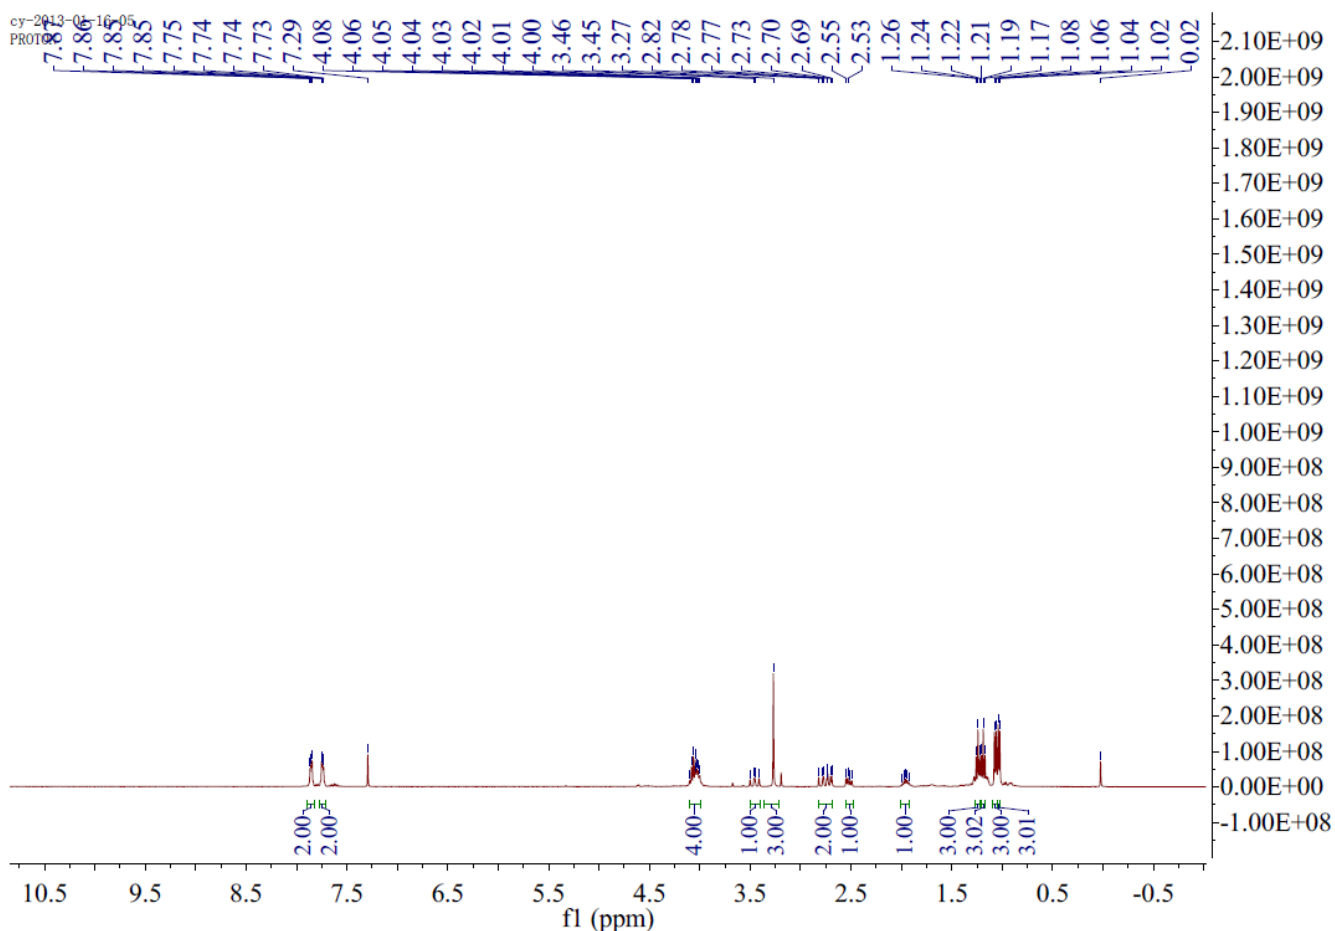



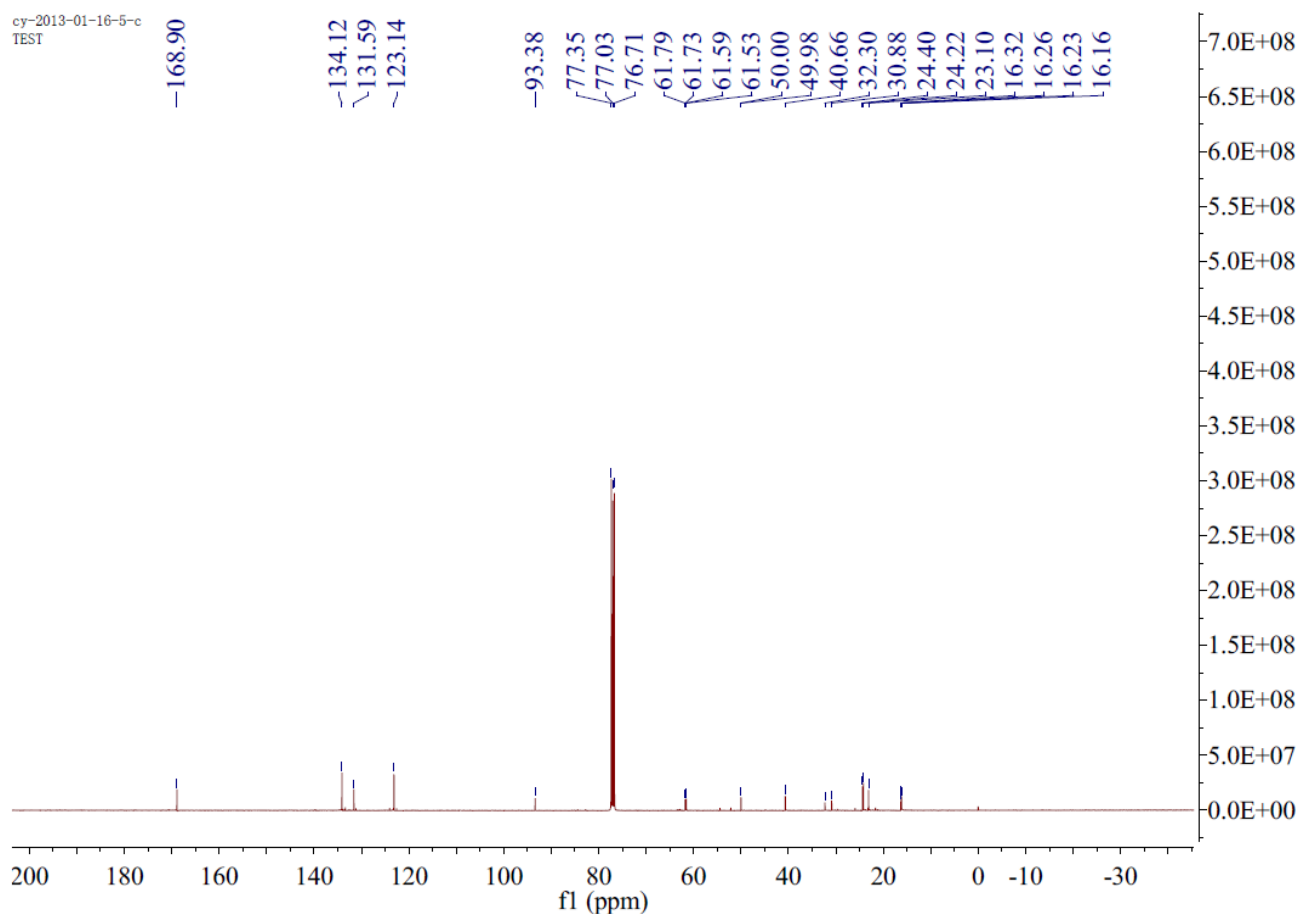

**(Z)-Diethyl (2-(1,3-dioxisoindolin-2-yl)prop-1-en-1-yl)phosphonate (9a):**

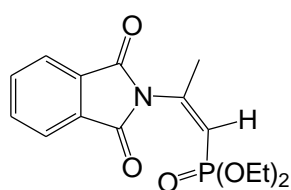

White solid; mp 140-143°C;  $^1\text{H}$  NMR (400 MHz,  $\text{CDCl}_3$ ):  $\delta$  7.87-7.94 (m, 2H, Ph), 7.69-7.80 (m, 2H, Ph), 5.96 (dd,  $J = 10.4, 1.2$  Hz, 1H, =CH), 3.98-4.13 (m, 4H, 2OCH<sub>2</sub>), 2.25 (s, 3H, CH<sub>3</sub>), 1.28 (t,  $J = 7.1$  Hz, 6H, 2CH<sub>3</sub>);  $^{13}\text{C}$  NMR (101 MHz,  $\text{CDCl}_3$ ):  $\delta$  166.63 (C=O), 146.83 (=CN), 134.11, 132.28, 123.71 (Ph), 118.32 (d,  $J = 186.2$  Hz, C-P), 62.08 (d,  $J = 5.3$  Hz, OCH<sub>2</sub>), 24.56 (d,  $J = 17$  Hz, CH<sub>3</sub>), 16.27 (d,  $J = 6.6$  Hz, CH<sub>3</sub>);  $^{31}\text{P}$  NMR (162 MHz,  $\text{CDCl}_3$ ):  $\delta$  11.34 (s). ESI-HRMS calcd for  $[\text{C}_{15}\text{H}_{18}\text{NO}_5\text{P}, \text{M}+\text{Na}]^+$ : 346.0815; Found: 346.0815.

cy-2012-07-07-7  
PROTON

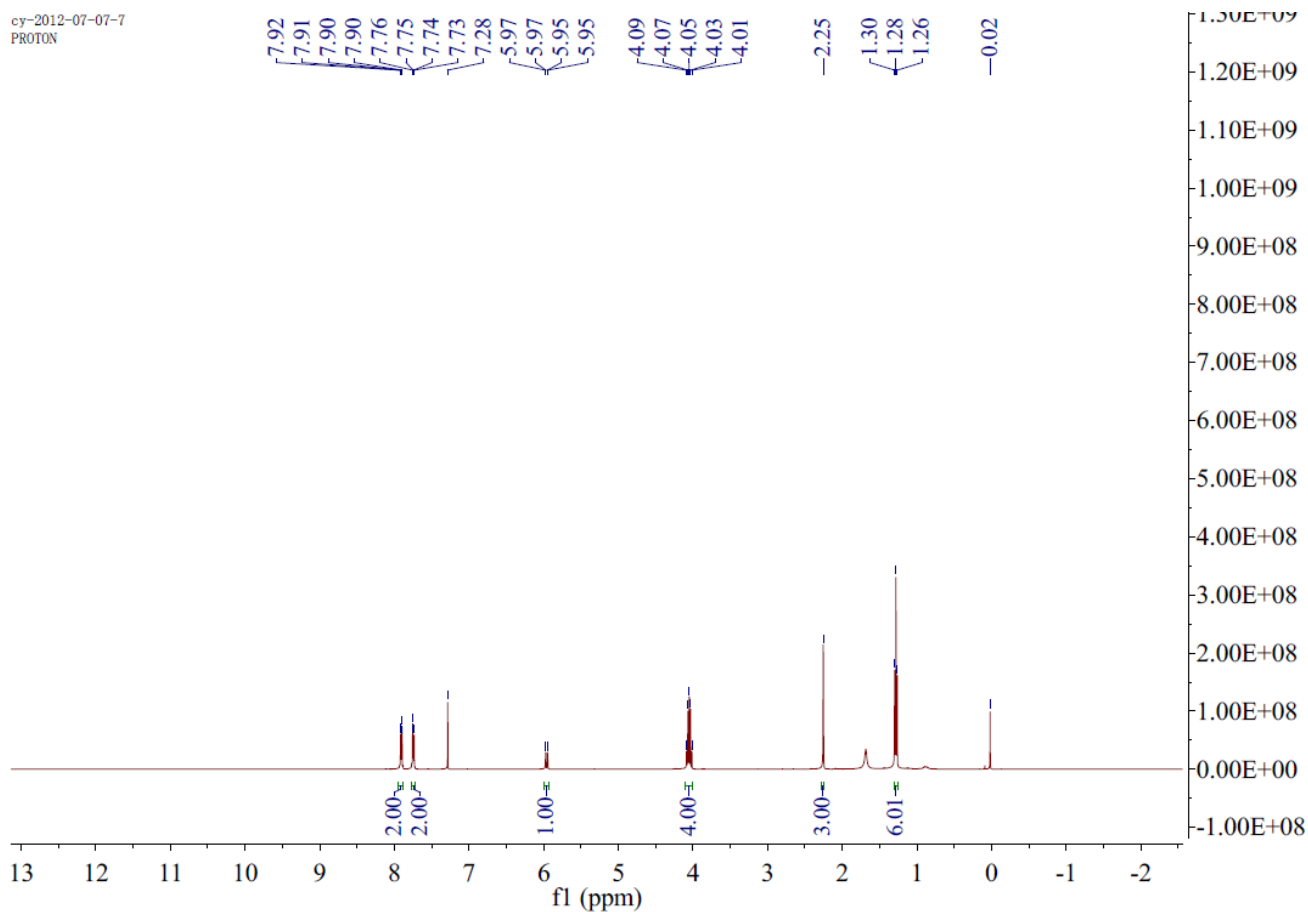

cy-2012-06-24-6  
C13CPD

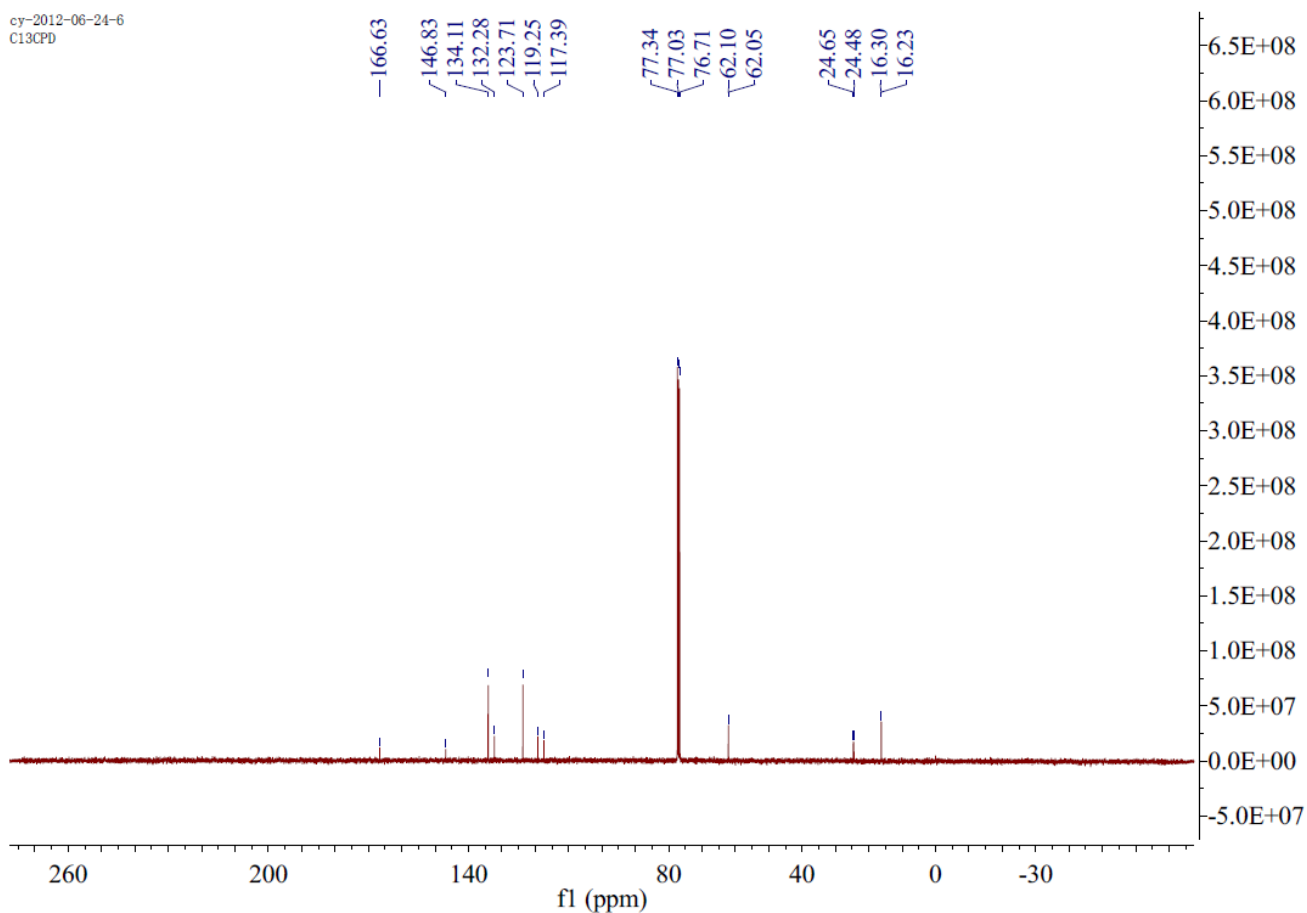

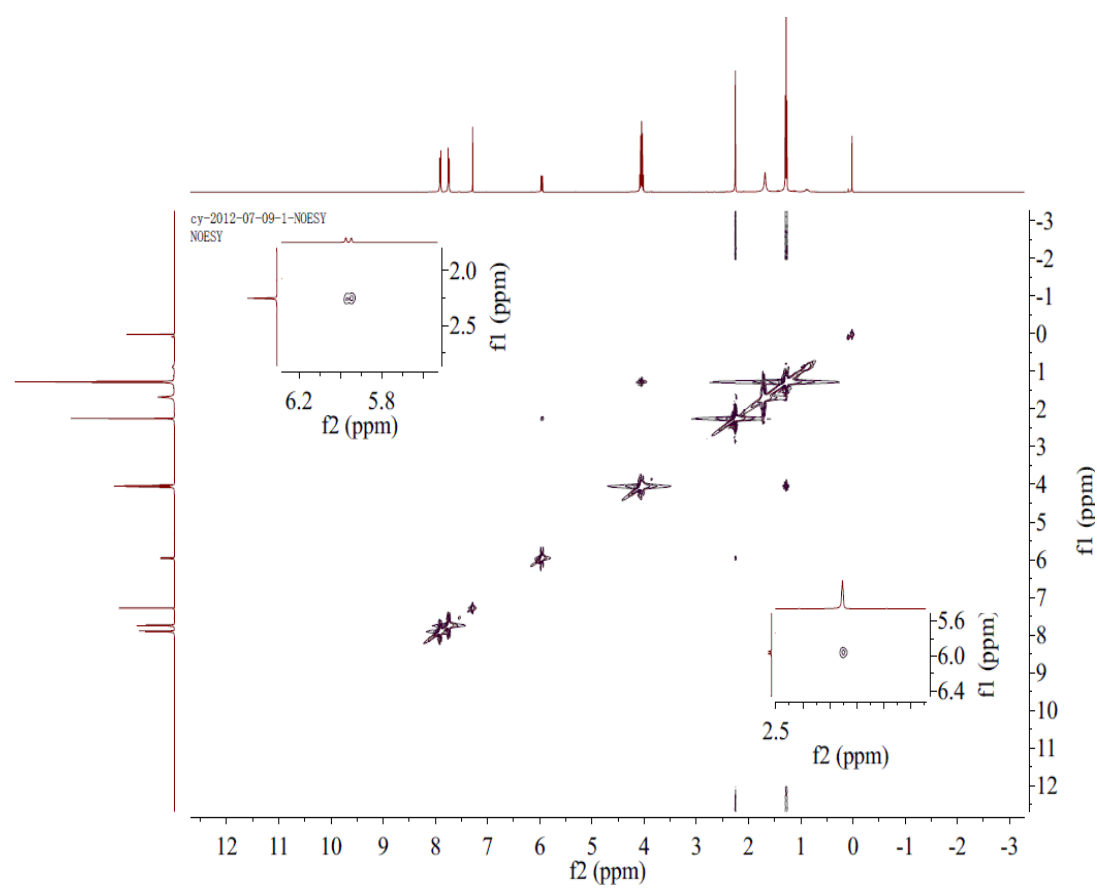

<sup>1</sup>H-<sup>1</sup>H NOESY spectrum of **9a**

Single Crystal X-Ray Analysis **9a** (CCDC 893994 contains the supplementary crystallographic data for this paper. These data can be obtained free of charge by contacting The Cambridge Crystallographic Data Centre, 12, Union Road, Cambridge CB2 1EZ, UK; fax: +44 1223 336033; E-mail: [deposit@ccdc.cam.ac.uk](mailto:deposit@ccdc.cam.ac.uk).)

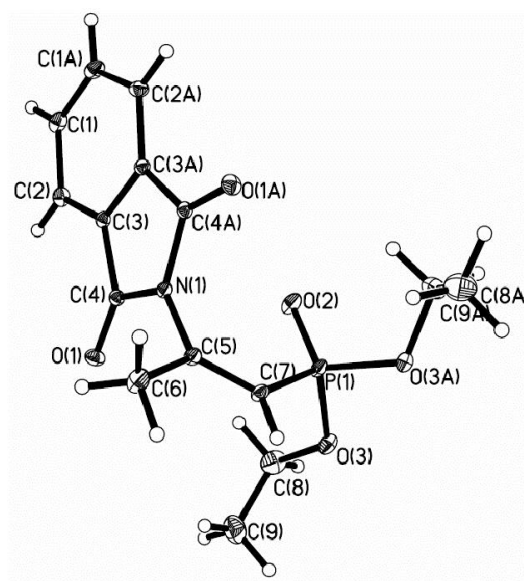

Table 1. Crystal data and structure refinement for shelx.

|                                 |                                                                                         |
|---------------------------------|-----------------------------------------------------------------------------------------|
| Identification code             | shelx                                                                                   |
| Empirical formula               | C <sub>15</sub> H <sub>18</sub> N O <sub>5</sub> P                                      |
| Formula weight                  | 323.27                                                                                  |
| Temperature                     | 293(2) K                                                                                |
| Wavelength                      | 0.71073 Å                                                                               |
| Crystal system, space group     | Orthorhombic, Pnma                                                                      |
| Unit cell dimensions            | a = 14.554(3) Å    α = 90°<br>b = 12.849(3) Å    β = 90°<br>c = 8.6466(17) Å    γ = 90° |
| Volume                          | 1617.0(6) Å <sup>3</sup>                                                                |
| Z, Calculated density           | 4, 1.328 Mg/m <sup>3</sup>                                                              |
| Absorption coefficient          | 0.192 mm <sup>-1</sup>                                                                  |
| F(000)                          | 680.0                                                                                   |
| Crystal size                    | 0.20 x 0.18 x 0.10 mm                                                                   |
| Theta range for data collection | 2.80 to 27.86°                                                                          |
| Limiting indices                | -19 ≤ h ≤ 19, -16 ≤ k ≤ 16, -11 ≤ l ≤ 11                                                |
| Reflections collected / unique  | 15501/2001 [R(int) = 0.0374]                                                            |
| Completeness to theta = 27.87   | 99.3%                                                                                   |
| Absorption correction           | Semi-empirical from equivalents                                                         |

|                                      |                                       |
|--------------------------------------|---------------------------------------|
| Max. and min. transmission           | 0.9811 and 0.9626                     |
| Refinement method                    | Full-matrix least-squares on $F^2$    |
| Data / restraints / parameters       | 2001/13/112                           |
| Goodness-of-fit on $F^2$             | 1.054                                 |
| Final R indices [ $I > 2\sigma(I)$ ] | $R1 = 0.0501$ , $wR2 = 0.1450$        |
| R indices (all data)                 | $R1 = 0.0616$ , $wR2 = 0.1570$        |
| Absolute structure parameter         | 0.072(12)                             |
| Largest diff. peak and hole          | 0.229 and -0.265 e. $\text{\AA}^{-3}$ |
